# Supplementary material
Source: MDPI journal article supplement (https://www.mdpi.com/2073-4344/13/3/510)
Supplement: s1 [file s1]

*Supporting Information*

*for*

**Bulky NHC–Cobalt Complex-Catalyzed Highly Markovnikov-Selective  
Hydrosilylation of Alkynes**

Małgorzata Bolt \* and Patrycja Żak

Department of Organometallic Chemistry, Faculty of Chemistry, Adam Mickiewicz University in  
Poznan, Uniwersytetu Poznańskiego 8, 61-614 Poznan, Poland

\* Correspondence: malgorzata.bolt@amu.edu.pl; Tel.: +48-61-829-17-31

**CONTENTS:**

|    |                                                       |      |
|----|-------------------------------------------------------|------|
| 1. | Synthesis of NHC-cobalt complex                       | S-2  |
| 2. | Analytical data and NMR spectra of NHC-cobalt complex | S-2  |
| 3. | Mercury poisoning experiment                          | S-3  |
| 4. | Hot filtration test                                   | S-3  |
| 5. | Analytical data of isolated products <b>P1-P34</b>    | S-4  |
| 6. | NMR spectra of isolated products <b>P1-P34</b>        | S-12 |
| 7. | References                                            | S-44 |

## 1. Synthesis of NHC-cobalt complex

The oven-dried 25 mL glass reactor equipped with a magnetic stirring bar was charged under argon with freshly isolated bulky NHC –  $\text{IPr}^{\text{MeO}}$  ( $1.6 \times 10^{-4}$  mol, 2 equiv.),  $\text{Co}_2(\text{CO})_8$  ( $0.8 \times 10^{-4}$  mol, 1 equiv.) and n-hexane (5 mL). The reaction mixture was stirred at RT for 2 hours. After this time, the suspension has been decanted, washed with 5 mL of hexane and dried under vacuum. Product was obtained as a brown solid (66% yield).

## 2. Analytical data and $^1\text{H}$ NMR spectra of NHC-cobalt complex

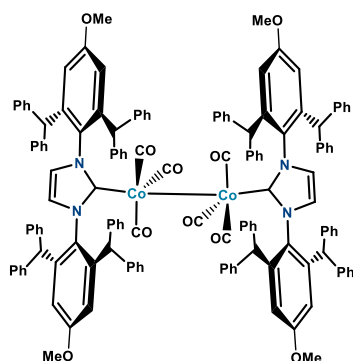

$^1\text{H}$  NMR (400 MHz,  $\text{CDCl}_3$ , 296K):  $\delta$  (ppm) 3.47 (6H,  $\text{CH}_3\text{O}-$ ), 3.53 (4H,  $\text{NCH=CHN}$ ), 3.58 (6H,  $\text{CH}_3\text{O}-$ ), 5.00 (4H,  $\text{CHPh}_2$ ), 5.28 (4H,  $\text{CHPh}_2$ ), 5.36 (4H,  $\text{CH}_{\text{Ar}}$ ), 6.50 – 6.65 (8H,  $\text{CH}_{\text{Ar}}$ ), 6.67 – 6.80 (20H,  $\text{CH}_{\text{Ar}}$ ), 6.90 – 7.15 (56H,  $\text{CH}_{\text{Ar}}$ ).

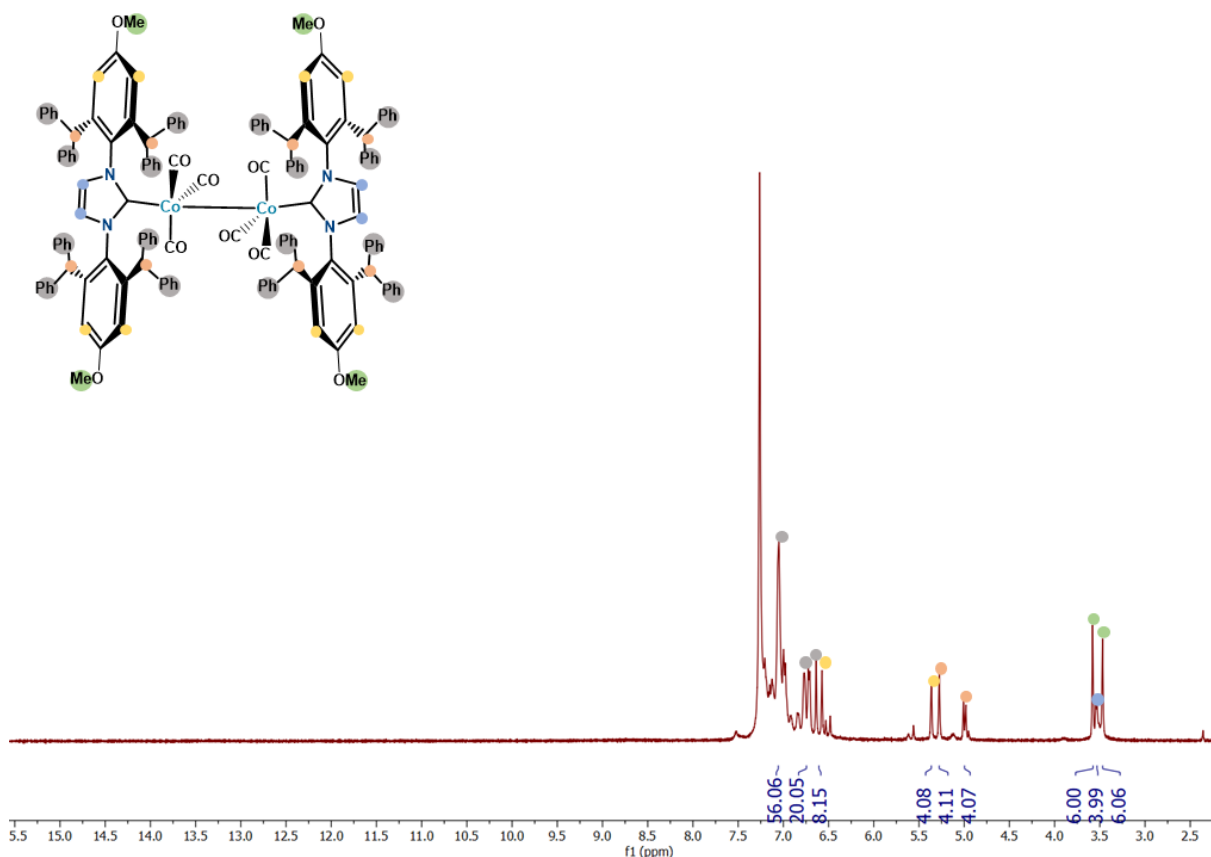

Figure S1.  $^1\text{H}$  NMR (400 MHz,  $\text{CDCl}_3$ ) of NHC-cobalt complex.

### 3. Mercury poisoning experiment

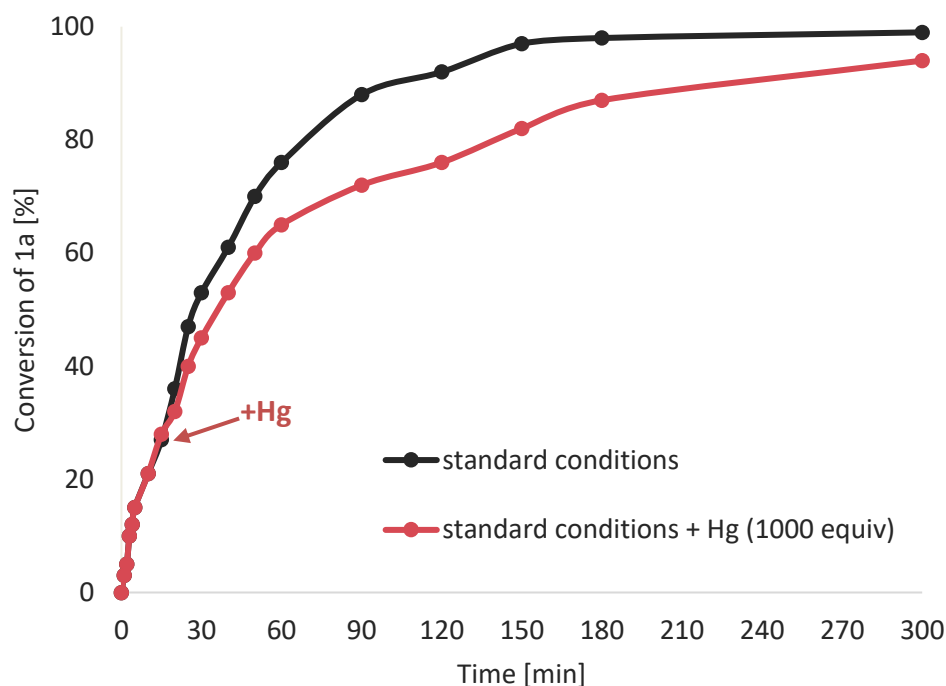

Figure S2. Mercury poisoning experiment. Profiles of the hydrosilylation of phenylacetylene (**1a**) with triethylsilane (**2a**) performed in the standard conditions with and without addition of mercury excess. Reaction conditions: Argon, THF, 60 °C, 5h, [**1a**]:[**2a**] = 1:1, [IPr\*<sup>Ph</sup>] = 5 mol%, [Co] = 2.5 mol%.

### 4. Hot filtration test

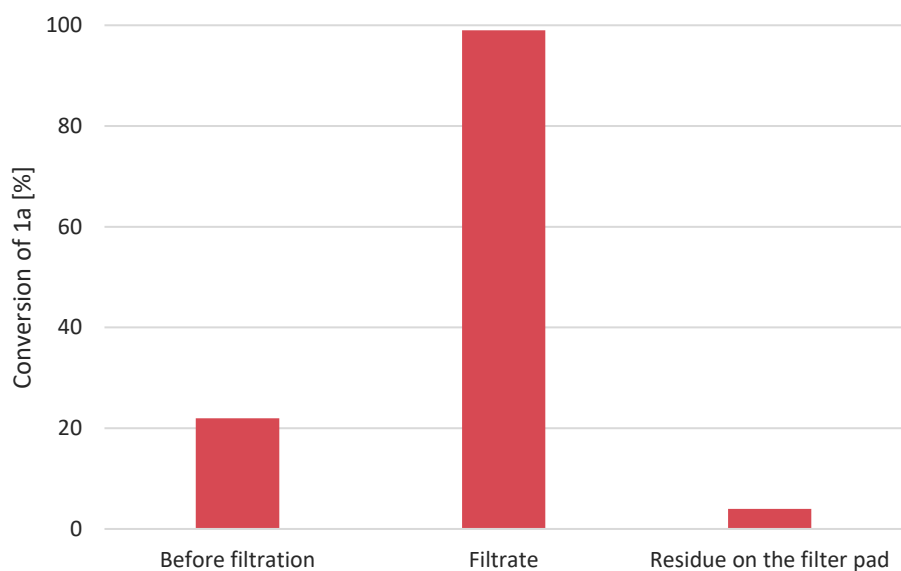

Figure S3. Hot filtration test. Hydrosilylation of phenylacetylene (**1a**) with triethylsilane (**2a**) performed in the standard conditions. Reaction conditions: Argon, THF, 60 °C, 5h, [**1a**]:[**2a**] = 1:1, [IPr\*<sup>Ph</sup>] = 5 mol%, [Co] = 2.5 mol%.

### 3. Analytical data of isolated products P1-P34

|                                                                                                                                  |                                                                                                                                                                                                                                                                                                                                                                                                                                                                                                                                                                                                                                                                                                                                                                                                                                                                                                                                                                                                                                                                                                                                                                                                    |
|----------------------------------------------------------------------------------------------------------------------------------|----------------------------------------------------------------------------------------------------------------------------------------------------------------------------------------------------------------------------------------------------------------------------------------------------------------------------------------------------------------------------------------------------------------------------------------------------------------------------------------------------------------------------------------------------------------------------------------------------------------------------------------------------------------------------------------------------------------------------------------------------------------------------------------------------------------------------------------------------------------------------------------------------------------------------------------------------------------------------------------------------------------------------------------------------------------------------------------------------------------------------------------------------------------------------------------------------|
| 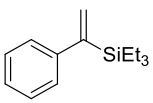 <p style="text-align: center;"><b>P1</b></p>   | <p><sup>1</sup>H NMR (400 MHz, CDCl<sub>3</sub>, 296K): δ (ppm) 0.68 (q, 6H, <i>J</i><sub>HH</sub> = 8.0 Hz, CH<sub>3</sub>CH<sub>2</sub>-), 0.94 (t, 9H, <i>J</i><sub>HH</sub> = 7.9 Hz, CH<sub>3</sub>CH<sub>2</sub>-), 5.59 (d, 1H, <i>J</i><sub>HH</sub> = 3.1 Hz, =CH), 5.89 (d, 1H, <i>J</i><sub>HH</sub> = 3.1 Hz, =CH), 7.13-7.24 (m, 3H, Ph), 7.58-7.33 (m, 2H, Ph); <sup>13</sup>C NMR (100 MHz, CDCl<sub>3</sub>, 296K): δ (ppm) 3.27 (CH<sub>3</sub>CH<sub>2</sub>-), 7.27 (CH<sub>3</sub>CH<sub>2</sub>-), 126.05, 126.62, 128.04, 128.78, 145.47 (=CH), 150.40 (=CH); MS <i>m/z</i> (rel, intensity): 115.00 (15), 161.17 (17), 183.30 (15), 185.30 (19), 186.30 (23), 188.40 (51), 189.30 (100, M<sup>+</sup> - C<sub>2</sub>H<sub>5</sub>), 190.20 (85), 191.10 (31), 218.20 (4, M<sup>+</sup>).</p> <p>These data are in accordance with the literature.<sup>1</sup></p>                                                                                                                                                                                                                                                                                                          |
|  <p style="text-align: center;"><b>P2</b></p>   | <p><sup>1</sup>H NMR (400 MHz, CDCl<sub>3</sub>, 296K): δ (ppm) 0.67 (q, 6H, <i>J</i><sub>HH</sub> = 7.8 Hz, CH<sub>3</sub>CH<sub>2</sub>-), 0.94 (t, 9H, <i>J</i><sub>HH</sub> = 7.9 Hz, CH<sub>3</sub>CH<sub>2</sub>-), 2.34 (s, 3H, CH<sub>3</sub>), 5.55 (d, 1H, <i>J</i><sub>HH</sub> = 3.1 Hz, =CH), 5.87 (d, 1H, <i>J</i><sub>HH</sub> = 3.1 Hz, =CH), 7.07 (d, 2H, <i>J</i><sub>HH</sub> = 8.6 Hz, -C<sub>6</sub>H<sub>4</sub>-Me), 7.11 (d, 2H, <i>J</i><sub>HH</sub> = 8.6 Hz, -C<sub>6</sub>H<sub>4</sub>-Me); <sup>13</sup>C NMR (100 MHz, CDCl<sub>3</sub>, 296K): δ (ppm) 3.31 (CH<sub>3</sub>CH<sub>2</sub>-), 7.31 (CH<sub>3</sub>CH<sub>2</sub>-), 21.04 (CH<sub>3</sub>), 126.50, 128.34, 128.76, 135.63, 142.46 (=CH), 150.02 (=CH); MS <i>m/z</i> (rel, intensity): 115.20 (52), 175.00 (40), 195.20 (59), 197.20 (63), 198.10 (70), 199.00 (69), 199.70 (76), 200.30 (76), 201.10 (86), 201.80 (85), 203.30 (100, M<sup>+</sup> - C<sub>2</sub>H<sub>5</sub>), 204.30 (86), 205.20 (37), 232.60 (10, M<sup>+</sup>).</p> <p>These data are in accordance with the literature.<sup>2</sup></p>                                                                                 |
|  <p style="text-align: center;"><b>P3</b></p> | <p><sup>1</sup>H NMR (400 MHz, CDCl<sub>3</sub>, 296K): δ (ppm) 0.67 (q, 6H, <i>J</i><sub>HH</sub> = 7.9 Hz, CH<sub>3</sub>CH<sub>2</sub>-), 0.94 (t, 9H, <i>J</i><sub>HH</sub> = 7.9 Hz, CH<sub>3</sub>CH<sub>2</sub>-), 2.35 (s, 3H, CH<sub>3</sub>), 5.56 (d, 1H, <i>J</i><sub>HH</sub> = 3.1 Hz, =CH), 5.87 (d, 1H, <i>J</i><sub>HH</sub> = 3.1 Hz, =CH), 6.94 - 6.98 (m, 2H, -C<sub>6</sub>H<sub>4</sub>-Me), 7.03 (d, 1H, <i>J</i><sub>HH</sub> = 7.5 Hz, -C<sub>6</sub>H<sub>4</sub>-Me), 7.18 (t, 2H, <i>J</i><sub>HH</sub> = 7.5 Hz, -C<sub>6</sub>H<sub>4</sub>-Me); <sup>13</sup>C NMR (100 MHz, CDCl<sub>3</sub>, 296K): δ (ppm) 3.29 (CH<sub>3</sub>CH<sub>2</sub>-), 7.30 (CH<sub>3</sub>CH<sub>2</sub>-), 21.50 (CH<sub>3</sub>), 123.72, 126.81, 127.32, 127.87, 128.54, 137.53, 145.42 (=CH<sub>2</sub>), 150.42 (=CH<sub>2</sub>); MS <i>m/z</i> (rel, intensity): 115.00 (33), 173.20 (22), 175.20 (26), 196.80 (23), 197.90 (25), 199.30 (32), 200.50 (36), 201.40 (46), 203.50 (100, M<sup>+</sup> - C<sub>2</sub>H<sub>5</sub>), 204.50 (95), 205.40 (36), 232.50 (6, M<sup>+</sup>).</p> <p>These data are in accordance with the literature.<sup>2</sup></p>               |
|  <p style="text-align: center;"><b>P4</b></p> | <p><sup>1</sup>H NMR (400 MHz, CDCl<sub>3</sub>, 296K): δ (ppm) 0.68 (q, 6H, <i>J</i><sub>HH</sub> = 7.8 Hz, CH<sub>3</sub>CH<sub>2</sub>-), 0.94 (t, 9H, <i>J</i><sub>HH</sub> = 7.9 Hz, CH<sub>3</sub>CH<sub>2</sub>-), 1.33 (s, 9H, C(CH<sub>3</sub>)<sub>3</sub>), 5.55 (d, 1H, <i>J</i><sub>HH</sub> = 3.1 Hz, =CH), 5.90 (d, 1H, <i>J</i><sub>HH</sub> = 3.1 Hz, =CH), 7.12 (d, 2H, <i>J</i><sub>HH</sub> = 8.6 Hz, -C<sub>6</sub>H<sub>4</sub>-<i>t</i>Bu), 7.31 (d, 2H, <i>J</i><sub>HH</sub> = 8.6 Hz, -C<sub>6</sub>H<sub>4</sub>-<i>t</i>Bu); <sup>13</sup>C NMR (100 MHz, CDCl<sub>3</sub>, 296K): δ (ppm) 3.33 (CH<sub>3</sub>CH<sub>2</sub>-), 7.33 (CH<sub>3</sub>CH<sub>2</sub>-), 31.38 (C(CH<sub>3</sub>)<sub>3</sub>), 34.36 (C(CH<sub>3</sub>)<sub>3</sub>), 124.96, 126.22, 128.36, 142.41, 148.91 (=CH), 149.75 (=CH); MS <i>m/z</i> (rel, intensity): 57.10 (100, C<sub>4</sub>H<sub>9</sub>), 114.20 (17), 115.20 (29), 159.00 (16), 237.80 (15), 238.80 (16), 239.50 (16), 240.20 (17), 240.80 (19), 242.50 (22), 243.70 (23), 244.50 (23), 246.30 (27), 259.10 (26), 274.10 (5, M<sup>+</sup>).</p> <p>These data are in accordance with the literature.<sup>3</sup></p> |

|                                                                                                                                  |                                                                                                                                                                                                                                                                                                                                                                                                                                                                                                                                                                                                                                                                                                                                                                                                                                                                                                                                                                                                                                                                                                                                             |
|----------------------------------------------------------------------------------------------------------------------------------|---------------------------------------------------------------------------------------------------------------------------------------------------------------------------------------------------------------------------------------------------------------------------------------------------------------------------------------------------------------------------------------------------------------------------------------------------------------------------------------------------------------------------------------------------------------------------------------------------------------------------------------------------------------------------------------------------------------------------------------------------------------------------------------------------------------------------------------------------------------------------------------------------------------------------------------------------------------------------------------------------------------------------------------------------------------------------------------------------------------------------------------------|
| 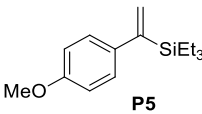 <p style="text-align: center;"><b>P5</b></p>   | <p><sup>1</sup>H NMR (400 MHz, CDCl<sub>3</sub>, 296K): δ (ppm) 0.68 (q, 6H, <i>J</i><sub>HH</sub> = 7.8 Hz, CH<sub>3</sub>CH<sub>2</sub>-), 0.93 (t, 9H, <i>J</i><sub>HH</sub> = 7.9 Hz, CH<sub>3</sub>CH<sub>2</sub>-), 3.81 (s, 3H, OCH<sub>3</sub>), 5.52 (d, 1H, <i>J</i><sub>HH</sub> = 3.1 Hz, =CH), 5.86 (d, 1H, <i>J</i><sub>HH</sub> = 3.1 Hz, =CH), 6.85 (d, 2H, <i>J</i><sub>HH</sub> = 8.7 Hz, -C<sub>6</sub>H<sub>4</sub>-OMe), 7.12 (d, 2H, <i>J</i><sub>HH</sub> = 8.7 Hz, -C<sub>6</sub>H<sub>4</sub>-OMe); <sup>13</sup>C NMR (100 MHz, CDCl<sub>3</sub>, 296K): δ (ppm) 3.34 (CH<sub>3</sub>CH<sub>2</sub>-), 7.30 (CH<sub>3</sub>CH<sub>2</sub>-), 55.16 (OCH<sub>3</sub>), 113.47, 127.62, 127.91, 137.79, 149.38 (=CH), 158.14 (=CH); MS <i>m/z</i> (rel, intensity): 162.20 (40), 163.20 (56), 191.20 (43), 215.30 (43), 216.00 (51), 217.30 (56), 217.90 (53), 219.30 (77), 219.80 (100, M<sup>+</sup> - C<sub>2</sub>H<sub>5</sub>), 221.30 (55), 248.00 (8, M<sup>+</sup>).</p> <p>These data are in accordance with the literature.<sup>1</sup></p>                                                              |
|  <p style="text-align: center;"><b>P6</b></p>   | <p><sup>1</sup>H NMR (400 MHz, CDCl<sub>3</sub>, 296K): δ (ppm) 0.71 (q, 6H, <i>J</i><sub>HH</sub> = 7.8 Hz, CH<sub>3</sub>CH<sub>2</sub>-), 0.96 (t, 9H, <i>J</i><sub>HH</sub> = 7.9 Hz, CH<sub>3</sub>CH<sub>2</sub>-), 5.61 (d, 1H, <i>J</i><sub>HH</sub> = 3.0 Hz, =CH), 5.95 (d, 1H, <i>J</i><sub>HH</sub> = 3.0 Hz, =CH), 7.24 – 7.26 (m, 2H, Ph), 7.32 – 7.36 (m, 1H, Ph), 7.42 – 7.46 (m, 2H, Ph), 7.53 – 7.56 (m, 2H, Ph), 7.60 – 7.63 (m, 2H, Ph); <sup>13</sup>C NMR (100 MHz, CDCl<sub>3</sub>, 296K): δ (ppm) 3.35 (CH<sub>3</sub>CH<sub>2</sub>-), 7.32 (CH<sub>3</sub>CH<sub>2</sub>-), 126.78, 126.91, 127.04, 127.06, 128.69, 128.84, 138.91, 140.93, 144.47 (=CH), 149.89 (=CH); MS <i>m/z</i> (rel, intensity): 206.20 (14), 264.00 (20), 265.60 (50), 266.50 (100, M<sup>+</sup> - C<sub>2</sub>H<sub>5</sub>), 267.50 (39), 294.30 (19, M<sup>+</sup>).</p> <p>These data are in accordance with the literature.<sup>4</sup></p>                                                                                                                                                                                       |
|  <p style="text-align: center;"><b>P7</b></p> | <p><sup>1</sup>H NMR (400 MHz, CDCl<sub>3</sub>, 296K): δ (ppm) 0.66 (q, 6H, <i>J</i><sub>HH</sub> = 7.8 Hz, CH<sub>3</sub>CH<sub>2</sub>-), 0.92 (t, 9H, <i>J</i><sub>HH</sub> = 7.9 Hz, CH<sub>3</sub>CH<sub>2</sub>-), 5.57 (d, 1H, <i>J</i><sub>HH</sub> = 3.0 Hz, =CH), 5.85 (d, 1H, <i>J</i><sub>HH</sub> = 3.0 Hz, =CH), 6.96 – 7.00 (m, 2H, -C<sub>6</sub>H<sub>4</sub>-F), 7.08 – 7.12 (m, 2H, -C<sub>6</sub>H<sub>4</sub>-F); <sup>13</sup>C NMR (100 MHz, CDCl<sub>3</sub>, 296K): δ (ppm) 3.22 (CH<sub>3</sub>CH<sub>2</sub>-), 7.25 (CH<sub>3</sub>CH<sub>2</sub>-), 114.85 (d, <i>J</i> = 21.1 Hz), 128.02 (d, <i>J</i> = 7.8 Hz), 129.03 (br s), 141.35 (d, <i>J</i> = 3.0 Hz), 149.38 (=CH<sub>2</sub>), 161.59 (d, <i>J</i> = 244.2 Hz); MS <i>m/z</i> (rel, intensity): 113.20 (20), 115.20 (39), 202.70 (21), 203.50 (23), 205.50 (36), 206.50 (53), 207.50 (100, M<sup>+</sup> - C<sub>2</sub>H<sub>5</sub>), 208.10 (97), 209.00 (37), 236.50 (4, M<sup>+</sup>).</p> <p>These data are in accordance with the literature.<sup>4</sup></p>                                                                             |
|  <p style="text-align: center;"><b>P8</b></p> | <p><sup>1</sup>H NMR (400 MHz, CDCl<sub>3</sub>, 296K): δ (ppm) 0.67 (q, 6H, <i>J</i><sub>HH</sub> = 7.9 Hz, CH<sub>3</sub>CH<sub>2</sub>-), 0.93 (t, 9H, <i>J</i><sub>HH</sub> = 7.9 Hz, CH<sub>3</sub>CH<sub>2</sub>-), 5.61 (d, 1H, <i>J</i><sub>HH</sub> = 2.9 Hz, =CH), 5.89 (d, 1H, <i>J</i><sub>HH</sub> = 2.9 Hz, =CH), 6.84 – 6.94 (m, 3H, -C<sub>6</sub>H<sub>4</sub>-F), 7.21 – 7.25 and 7.27 – 7.29 (m, 1H, -C<sub>6</sub>H<sub>4</sub>-F); <sup>13</sup>C NMR (100 MHz, CDCl<sub>3</sub>, 296K): δ (ppm) 3.19 (CH<sub>3</sub>CH<sub>2</sub>-), 7.23 (CH<sub>3</sub>CH<sub>2</sub>-), 112.84 (d, <i>J</i> = 21.1 Hz), 113.47 (d, <i>J</i> = 21.1 Hz), 122.37 (d, <i>J</i> = 2.6 Hz), 129.38, 129.46, 129.52, 147.83 (d, <i>J</i> = 7.2 Hz), 149.54 (=CH), 162.64 (d, <i>J</i> = 245.2 Hz); MS <i>m/z</i> (rel, intensity): 46.80 (21), 58.70 (17), 86.70 (25), 114.80 (18), 124.70 (47), 148.80 (35), 150.60 (100), 151.70 (18), 152.70 (29), 176.70 (18), 178.80 (60), 179.60 (19), 206.50 (82), 207.50 (96), 208.50 (20), 236.50 (6, M<sup>+</sup>).</p> <p>These data are in accordance with the literature.<sup>5</sup></p> |

|                                                                                                       |                                                                                                                                                                                                                                                                                                                                                                                                                                                                                                                                                                                                                                                                                                                                                                                                                                                                                                                                                                                                                                                                                                                                                        |
|-------------------------------------------------------------------------------------------------------|--------------------------------------------------------------------------------------------------------------------------------------------------------------------------------------------------------------------------------------------------------------------------------------------------------------------------------------------------------------------------------------------------------------------------------------------------------------------------------------------------------------------------------------------------------------------------------------------------------------------------------------------------------------------------------------------------------------------------------------------------------------------------------------------------------------------------------------------------------------------------------------------------------------------------------------------------------------------------------------------------------------------------------------------------------------------------------------------------------------------------------------------------------|
| 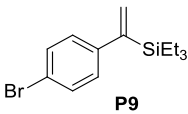 <p><b>P9</b></p>    | <p><sup>1</sup>H NMR (400 MHz, CDCl<sub>3</sub>, 296K): δ (ppm) 0.65 (q, 6H, <i>J</i><sub>HH</sub> = 7.8 Hz, CH<sub>3</sub>CH<sub>2</sub>-), 0.91 (t, 9H, <i>J</i><sub>HH</sub> = 7.8 Hz, CH<sub>3</sub>CH<sub>2</sub>-), 5.58 (d, 1H, <i>J</i><sub>HH</sub> = 2.9 Hz, =CH), 5.85 (d, 1H, <i>J</i><sub>HH</sub> = 2.9 Hz, =CH), 7.01 (d, 2H, <i>J</i><sub>HH</sub> = 8.5 Hz, -C<sub>6</sub>H<sub>4</sub>-Br), 7.40 (d, 2H, <i>J</i><sub>HH</sub> = 8.5 Hz, -C<sub>6</sub>H<sub>4</sub>-Br); <sup>13</sup>C NMR (100 MHz, CDCl<sub>3</sub>, 296K): δ (ppm) 3.18 (CH<sub>3</sub>CH<sub>2</sub>-), 7.25 (CH<sub>3</sub>CH<sub>2</sub>-), 120.01, 128.33, 129.33, 131.13, 144.42 (=CH), 149.42 (=CH); MS <i>m/z</i> (rel, intensity): 113.40 (17), 114.30 (21), 115.30 (33), 116.20 (19), 117.20 (12), 210.30 (12), 211.10 (13), 239.20 (14), 266.50 (17), 267.50 (95), 269.10 (86), 296.80 (100, M<sup>+</sup>).<br/>These data are in accordance with the literature.<sup>4</sup></p>                                                                                                                                                                    |
|  <p><b>P10</b></p>   | <p><sup>1</sup>H NMR (400 MHz, CDCl<sub>3</sub>, 296K): δ (ppm) 0.67 (q, 6H, <i>J</i><sub>HH</sub> = 7.8 Hz, CH<sub>3</sub>CH<sub>2</sub>-), 0.94 (t, 9H, <i>J</i><sub>HH</sub> = 7.9 Hz, CH<sub>3</sub>CH<sub>2</sub>-), 2.34 (s, 3H, CH<sub>3</sub>), 5.66 (d, 1H, <i>J</i><sub>HH</sub> = 2.9 Hz, =CH), 5.90 (d, 1H, <i>J</i><sub>HH</sub> = 2.9 Hz, =CH), 7.24 (d, 2H, <i>J</i><sub>HH</sub> = 7.9 Hz, -C<sub>6</sub>H<sub>4</sub>-CF<sub>3</sub>), 7.55 (d, 2H, <i>J</i><sub>HH</sub> = 7.9 Hz, -C<sub>6</sub>H<sub>4</sub>-CF<sub>3</sub>); <sup>13</sup>C NMR (100 MHz, CDCl<sub>3</sub>, 296K): δ (ppm) 3.15 (CH<sub>3</sub>CH<sub>2</sub>-), 7.21 (CH<sub>3</sub>CH<sub>2</sub>-), 125.03 (q, <i>J</i> = 3.7 Hz, CF<sub>3</sub>), 126.89, 130.12, 149.35(=CH), 149.76 (=CH); MS <i>m/z</i> (rel, intensity): 151.00 (10), 257.20 (22), 258.50 (21), 267.00 (100, M<sup>+</sup> - F), 268.00 (22), 286.80 (3, M<sup>+</sup>)<br/>These data are in accordance with the literature.<sup>5</sup></p>                                                                                                                                             |
|  <p><b>P11</b></p> | <p><sup>1</sup>H NMR (400 MHz, CDCl<sub>3</sub>, 296K): δ (ppm) 0.72 (q, 6H, <i>J</i><sub>HH</sub> = 7.8 Hz, CH<sub>3</sub>CH<sub>2</sub>-), 0.95 (t, 9H, <i>J</i><sub>HH</sub> = 7.9 Hz, CH<sub>3</sub>CH<sub>2</sub>-), 2.96 (s, 36H, NCH<sub>3</sub>), 5.47 (br s, 1H, =CH), 5.87 (br s, 1H, =CH), 6.62 – 6.78 (m, 2H, -C<sub>6</sub>H<sub>4</sub>-NMe<sub>2</sub>), 7.08 – 7.20 (m, 2H, -C<sub>6</sub>H<sub>4</sub>-NMe<sub>2</sub>); <sup>13</sup>C NMR (100 MHz, CDCl<sub>3</sub>, 296K): δ (ppm) 3.45 (CH<sub>3</sub>CH<sub>2</sub>-), 7.33 (CH<sub>3</sub>CH<sub>2</sub>-), 40.58 (N(CH<sub>3</sub>)<sub>3</sub>), 112.53, 126.51, 127.23, 127.26, 149.07 (=CH); MS <i>m/z</i> (rel, intensity): 230.50 (5), 231.50 (6), 232.40 (6), 233.50 (7), 260.20 (85), 261.20 (100, M<sup>+</sup>).<br/>These data are in accordance with the literature.<sup>1</sup></p>                                                                                                                                                                                                                                                                               |
|  <p><b>P12</b></p> | <p><sup>1</sup>H NMR (400 MHz, CDCl<sub>3</sub>, 296K): δ (ppm) 0.70 (q, 6H, <i>J</i><sub>HH</sub> = 7.9 Hz, CH<sub>3</sub>CH<sub>2</sub>-), 0.94 (t, 9H, <i>J</i><sub>HH</sub> = 7.9 Hz, CH<sub>3</sub>CH<sub>2</sub>-), 5.53 (d, 1H, <i>J</i><sub>HH</sub> = 3.0 Hz, =CH), 6.02 (d, 1H, <i>J</i><sub>HH</sub> = 3.0 Hz, =CH), 7.03 (dd, 1H, <i>J</i><sub>HH</sub> = 2.9, 1.3 Hz, thiophene), 7.06 (dd, 1H, <i>J</i><sub>HH</sub> = 5.0, 1.3 Hz, thiophene), 7.25 (dd, 1H, <i>J</i><sub>HH</sub> = 5.0, 2.9 Hz, thiophene); <sup>13</sup>C NMR (100 MHz, CDCl<sub>3</sub>, 296K): δ (ppm) 3.33 (CH<sub>3</sub>CH<sub>2</sub>-), 7.29 (CH<sub>3</sub>CH<sub>2</sub>-), 119.57, 124.87, 126.66, 127.76, 128.69, 143.64 (=CH), 145.24 (=CH); MS <i>m/z</i> (rel, intensity): 108.90 (44), 109.80 (30), 110.74 (34), 111.70 (33), 113.20 (41), 114.00 (35), 115.30 (40), 165.30 (46), 167.10 (95), 168.00 (52), 169.20 (34), 191.20 (35), 192.50 (42), 193.30 (57), 195.20 (100, M<sup>+</sup> - C<sub>2</sub>H<sub>5</sub>), 196.20 (73), 197.20 (31), 224.50 (17, M<sup>+</sup>).<br/>These data are in accordance with the literature.<sup>4</sup></p> |

|                                                                                                               |                                                                                                                                                                                                                                                                                                                                                                                                                                                                                                                                                                                                                                                                                                                                                                                                                                                                                                                                                                                                                                                                                                                                                                                                                                                                                                                                                                                                                                                                                                                                                                                                                                                                                                                                                                                                                                                                                                                    |
|---------------------------------------------------------------------------------------------------------------|--------------------------------------------------------------------------------------------------------------------------------------------------------------------------------------------------------------------------------------------------------------------------------------------------------------------------------------------------------------------------------------------------------------------------------------------------------------------------------------------------------------------------------------------------------------------------------------------------------------------------------------------------------------------------------------------------------------------------------------------------------------------------------------------------------------------------------------------------------------------------------------------------------------------------------------------------------------------------------------------------------------------------------------------------------------------------------------------------------------------------------------------------------------------------------------------------------------------------------------------------------------------------------------------------------------------------------------------------------------------------------------------------------------------------------------------------------------------------------------------------------------------------------------------------------------------------------------------------------------------------------------------------------------------------------------------------------------------------------------------------------------------------------------------------------------------------------------------------------------------------------------------------------------------|
| 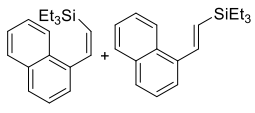 <p><b>1:0.6<br/>P13</b></p> | <p><sup>1</sup>H NMR (400 MHz, CDCl<sub>3</sub>, 296K): δ (ppm) β-(Z): 0.43 (q, 6H, <i>J</i><sub>HH</sub> = 8.0 Hz, CH<sub>3</sub>CH<sub>2</sub>-), 0.83 (t, 9H, <i>J</i><sub>HH</sub> = 7.8 Hz, CH<sub>3</sub>CH<sub>2</sub>-), 6.10 (d, 1H, <i>J</i><sub>HH</sub> = 15.0 Hz, =CH), 7.39 (dt, 1H, <i>J</i><sub>HH</sub> = 6.9, 1.2 Hz, CH<sub>Ar</sub>), 7.45 (d, 1H, <i>J</i><sub>HH</sub> = 7.7 Hz, CH<sub>Ar</sub>), 7.47 – 7.51 (m, 1H, CH<sub>Ar</sub>), 7.53 – 7.56 (m, 1H, CH<sub>Ar</sub>), 7.72 (d, 1H, <i>J</i><sub>HH</sub> = 7.4 Hz, CH<sub>Ar</sub>), 7.80 (d, 1H, <i>J</i><sub>HH</sub> = 15.8 Hz, =CH), 7.95 (d, 1H, <i>J</i><sub>HH</sub> = 14.3 Hz, CH<sub>Ar</sub>), 8.01 – 8.05 (m, 1H, CH<sub>Ar</sub>); β-(E): 0.78 (q, 6H, <i>J</i><sub>HH</sub> = 7.9 Hz, CH<sub>3</sub>CH<sub>2</sub>-), 1.10 (t, 9H, <i>J</i><sub>HH</sub> = 7.5 Hz, CH<sub>3</sub>CH<sub>2</sub>-), 6.54 (d, 1H, <i>J</i><sub>HH</sub> = 18.9 Hz, =CH), 7.51 – 7.53 (m, 3H, CH<sub>Ar</sub>), 7.56 – 7.59 (m, 1H, CH<sub>Ar</sub>), 7.82 – 7.84 (m, 1H, CH<sub>Ar</sub>), 7.87 – 7.90 (m, 3H, CH<sub>Ar</sub>), 8.21 (d, 1H, <i>J</i><sub>HH</sub> = 7.3 Hz, CH<sub>Ar</sub>); <sup>13</sup>C NMR (100 MHz, CDCl<sub>3</sub>, 296K): δ (ppm) β-(Z)+β-(E): 3.63 (CH<sub>3</sub>CH<sub>2</sub>-), 4.54 (CH<sub>3</sub>CH<sub>2</sub>-), 7.37 (CH<sub>3</sub>CH<sub>2</sub>-), 7.49 (CH<sub>3</sub>CH<sub>2</sub>-), 123.58, 125.02, 125.16, 125.49, 125.61, 125.56, 125.73, 125.77, 126.00, 127.81, 128.04, 128.23, 128.51, 130.29, 130.37, 130.90, 131.76, 133.18, 133.64, 136.89 (CH=), 138.37 (CH=), 142.19 (CH=), 146.05 (CH=); MS <i>m/z</i> (rel, intensity): 209.30 (10), 210.50 (10), 211.20 (14), 237.60 (12), 238.50 (22), 239.50 (100, M<sup>+</sup> - C<sub>2</sub>H<sub>5</sub>), 240.30 (25), 268.00 (15, M<sup>+</sup>).</p> <p>These data are in accordance with the literature (β-(E)).<sup>11</sup></p> |
|  <p><b>P14</b></p>         | <p><sup>1</sup>H NMR (400 MHz, CDCl<sub>3</sub>, 296K): δ (ppm) 0.65 (q, 6H, <i>J</i><sub>HH</sub> = 7.8 Hz, CH<sub>3</sub>CH<sub>2</sub>-), 0.91 (t, 9H, <i>J</i><sub>HH</sub> = 7.8 Hz, CH<sub>3</sub>CH<sub>2</sub>-), 5.67 (d, 1H, <i>J</i><sub>HH</sub> = 2.8 Hz, =CH), 5.89 (d, 1H, <i>J</i><sub>HH</sub> = 2.8 Hz, =CH), 7.22 (d, 2H, <i>J</i><sub>HH</sub> = 8.4 Hz, -C<sub>6</sub>H<sub>4</sub>-), 7.58 (d, 2H, <i>J</i><sub>HH</sub> = 8.4 Hz, -C<sub>6</sub>H<sub>4</sub>-); <sup>13</sup>C NMR (100 MHz, CDCl<sub>3</sub>, 296K): δ (ppm) 3.16 (CH<sub>3</sub>CH<sub>2</sub>-), 7.18 (CH<sub>3</sub>CH<sub>2</sub>-), 109.78, 119.13, 127.36, 130.61, 131.98, 149.67 (=CH), 150.65 (=CH); MS <i>m/z</i> (rel, intensity): 87.20 (9), 115.00 (15), 132.00 (23), 158.30 (82), 186.20 (30), 243.00 (100, M<sup>+</sup>).</p> <p>These data are in accordance with the literature.<sup>4</sup></p>                                                                                                                                                                                                                                                                                                                                                                                                                                                                                                                                                                                                                                                                                                                                                                                                                                                                                                                                                                                                         |
|  <p><b>P15</b></p>         | <p><sup>1</sup>H NMR (400 MHz, CDCl<sub>3</sub>, 296K): δ (ppm) 0.57 (q, 12H, <i>J</i><sub>HH</sub> = 7.9 Hz, CH<sub>3</sub>CH<sub>2</sub>-), 0.93 (t, 9H, <i>J</i><sub>HH</sub> = 7.9 Hz, CH<sub>3</sub>CH<sub>2</sub>-), 5.54 (s, 2H, =CH<sub>2</sub>); <sup>13</sup>C NMR (100 MHz, CDCl<sub>3</sub>, 296K): δ (ppm) 3.19 (CH<sub>3</sub>CH<sub>2</sub>-), 7.36 (CH<sub>3</sub>CH<sub>2</sub>-), 148.89 (=CH<sub>2</sub>); MS <i>m/z</i> (rel, intensity): 59.00 (25), 87.00 (30), 115.90 (41), 139.90 (18), 197.90 (100, M<sup>+</sup> - (C<sub>2</sub>H<sub>5</sub>)<sub>2</sub>), 199.20 (20), 226.80 (10), 256.00 (5, M<sup>+</sup>).</p> <p>These data are in accordance with the literature.<sup>6</sup></p>                                                                                                                                                                                                                                                                                                                                                                                                                                                                                                                                                                                                                                                                                                                                                                                                                                                                                                                                                                                                                                                                                                                                                                                              |
|  <p><b>P16</b></p>         | <p><sup>1</sup>H NMR (400 MHz, CDCl<sub>3</sub>, 296K): δ (ppm) 0.58 (q, 12H, <i>J</i><sub>HH</sub> = 7.9 Hz, CH<sub>3</sub>CH<sub>2</sub>-), 0.94 (t, 9H, <i>J</i><sub>HH</sub> = 7.9 Hz, CH<sub>3</sub>CH<sub>2</sub>-), 1.02 – 1.13 (m, 21H, (CH<sub>3</sub>)<sub>2</sub>CH), 6.50 (d, 1H, <i>J</i><sub>HH</sub> = 23.1 Hz, =CH), 6.58 (d, 1H, <i>J</i><sub>HH</sub> = 23.1 Hz, =CH); <sup>13</sup>C NMR (100 MHz, CDCl<sub>3</sub>, 296K): δ (ppm) 3.23 (CH<sub>3</sub>CH<sub>2</sub>-), 7.40 (CH<sub>3</sub>CH<sub>2</sub>-), 10.63 ((CH<sub>3</sub>)<sub>2</sub>CH), 18.60 ((CH<sub>3</sub>)<sub>2</sub>CH), 148.86 (=CH), 150.00 (=CH); MS <i>m/z</i> (rel, intensity): 211.20 (17), 213.20 (42), 214.20 (20), 226.30 (21), 227.30 (100), 228.20 (26), 229.20 (19), 254.90 (35), 298.80 (2, M<sup>+</sup>).</p> <p>These data are in accordance with the literature.<sup>7</sup></p>                                                                                                                                                                                                                                                                                                                                                                                                                                                                                                                                                                                                                                                                                                                                                                                                                                                                                                                                                                                                                        |

|                                                                                                                                   |                                                                                                                                                                                                                                                                                                                                                                                                                                                                                                                                                                                                                                                                                                                                                                                                                                                                                                                                                                                                           |
|-----------------------------------------------------------------------------------------------------------------------------------|-----------------------------------------------------------------------------------------------------------------------------------------------------------------------------------------------------------------------------------------------------------------------------------------------------------------------------------------------------------------------------------------------------------------------------------------------------------------------------------------------------------------------------------------------------------------------------------------------------------------------------------------------------------------------------------------------------------------------------------------------------------------------------------------------------------------------------------------------------------------------------------------------------------------------------------------------------------------------------------------------------------|
| 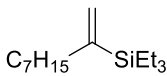 <p style="text-align: center;"><b>P17</b></p>   | <p><sup>1</sup>H NMR (400 MHz, CDCl<sub>3</sub>, 296K): δ (ppm) 0.51 – 0.63 (m, 6H, CH<sub>3</sub>CH<sub>2</sub>-), 0.85 – 0.97 (m, 12H, CH<sub>3</sub> and CH<sub>3</sub>CH<sub>2</sub>-), 1.24 – 1.34 (m, 8H, CH<sub>2</sub>), 1.36 – 1.42 (m, 2H, CH<sub>2</sub>), 2.04 – 2.11 (m, 2H, CH<sub>2</sub>), 5.28 (dt, 1H, J<sub>HH</sub> = 3.1, 1.0 Hz, =CH), 5.60 – 5.65 (m, 1H, =CH); <sup>13</sup>C NMR (100 MHz, CDCl<sub>3</sub>, 296K): δ (ppm) 2.93 (CH<sub>3</sub>CH<sub>2</sub>-), 7.37 (CH<sub>3</sub>CH<sub>2</sub>-), 14.10 (CH<sub>3</sub>), 22.68 (CH<sub>2</sub>), 28.93 (CH<sub>2</sub>), 29.26 (CH<sub>2</sub>), 29.58 (CH<sub>2</sub>), 31.89 (CH<sub>2</sub>), 36.36 (CH<sub>2</sub>), 124.83 (=CH), 149.27 (=CH); MS m/z (rel, intensity): 206.70 (10), 207.30 (10), 208.50 (14), 209.50 (20), 210.50 (34), 211.30 (100, M<sup>+</sup> - C<sub>2</sub>H<sub>5</sub>), 212.30 (26), 240.30 (2, M<sup>+</sup>).</p> <p>These data are in accordance with the literature.<sup>9</sup></p> |
|  <p style="text-align: center;"><b>P18</b></p>   | <p><sup>1</sup>H NMR (400 MHz, CDCl<sub>3</sub>, 296K): δ (ppm) 0.52 – 0.65 (m, 6H, CH<sub>3</sub>CH<sub>2</sub>-), 0.93 (t, 9H, J<sub>HH</sub> = 7.9 Hz, CH<sub>3</sub>CH<sub>2</sub>-), 1.07 – 1.32 (m, 5H, c-CH<sub>2</sub>), 1.64 – 1.80 (m, 5H, c-CH<sub>2</sub>), 1.92 – 2.12 (m, 1H, c-CH), 5.30 (d, 1H, J<sub>HH</sub> = 2.6 Hz, =CH), 5.67 (dd, 1H, J<sub>HH</sub> = 2.6, 1.1 Hz, =CH); <sup>13</sup>C NMR (100 MHz, CDCl<sub>3</sub>, 296K): δ (ppm) 3.13 (CH<sub>3</sub>CH<sub>2</sub>-), 7.43 (CH<sub>3</sub>CH<sub>2</sub>-), 26.39 (c-CH), 27.12 (c-CH), 35.54 (c-CH), 45.12 (c-CH), 123.41 (=CH), 154.54 (=CH); MS m/z (rel, intensity): 111.00 (6), 115.00 (6), 139.00 (10), 166.90 (100, M<sup>+</sup> - 2C<sub>2</sub>H<sub>5</sub>), 194.70 (46), 223.50 (2, M<sup>+</sup>).</p> <p>These data are in accordance with the literature.<sup>4</sup></p>                                                                                                                                  |
|  <p style="text-align: center;"><b>P19</b></p> | <p><sup>1</sup>H NMR (400 MHz, CDCl<sub>3</sub>, 296K): δ (ppm) 0.61 (q, 6H, J<sub>HH</sub> = 7.7 Hz, CH<sub>3</sub>CH<sub>2</sub>-), 0.93 (t, 9H, J<sub>HH</sub> = 7.8 Hz, CH<sub>3</sub>CH<sub>2</sub>-), 1.45 (t, 1H, J<sub>HH</sub> = 5.8 Hz, OH), 2.39 (t, 2H, J<sub>HH</sub> = 6.6 Hz, CH<sub>2</sub>), 3.67 (dd, 2H, J<sub>HH</sub> = 12.5, 6.6 Hz, CH<sub>2</sub>), 5.44 (d, 1H, J<sub>HH</sub> = 2.9 Hz, =CH), 5.72 – 5.74 (m, 1H, =CH); <sup>13</sup>C NMR (100 MHz, CDCl<sub>3</sub>, 296K): δ (ppm) 2.86 (CH<sub>3</sub>CH<sub>2</sub>-), 7.28 (CH<sub>3</sub>CH<sub>2</sub>-), 39.37 (CH<sub>2</sub>), 61.31 (CH<sub>2</sub>), 128.16 (=CH), 145.41 (=CH); MS m/z (rel, intensity): 55.00 (40), 101.20 (26), 103.00 (55), 113.10 (24), 115.00 (56), 156.90 (100, M<sup>+</sup> - C<sub>2</sub>H<sub>5</sub>), 186.00 (3, M<sup>+</sup>).</p> <p>These data are in accordance with the literature.<sup>4</sup></p>                                                                            |
|  <p style="text-align: center;"><b>P20</b></p> | <p><sup>1</sup>H NMR (400 MHz, CDCl<sub>3</sub>, 296K): δ (ppm) 0.68 (q, 6H, J<sub>HH</sub> = 7.9 Hz, CH<sub>3</sub>CH<sub>2</sub>-), 0.97 (t, 9H, J<sub>HH</sub> = 7.9 Hz, CH<sub>3</sub>CH<sub>2</sub>-), 4.91 (t, 2H, J<sub>HH</sub> = 1.6 Hz, CH<sub>2</sub>O), 5.48 – 5.52 (m, 1H, =CH), 5.95 – 5.99 (m, 1H, =CH), 7.43 – 7.47 (m, 2H, Ph), 7.54 – 7.58 (m, 1H, Ph), 8.06 – 8.09 (m, 2H, Ph); <sup>13</sup>C NMR (100 MHz, CDCl<sub>3</sub>, 296K): δ (ppm) 2.80 (CH<sub>3</sub>CH<sub>2</sub>-), 7.22 (CH<sub>3</sub>CH<sub>2</sub>-), 68.51 (CH<sub>2</sub>O), 126.83, 128.34, 129.56, 130.34, 132.85, 143.27 (=CH), 166.22 (=CH); MS m/z (rel, intensity): 105.00 (49), 115.00 (16), 206.20 (21), 207.20 (100, M<sup>+</sup> - C<sub>4</sub>H<sub>10</sub>), 208.10 (34), 247.20 (29, M<sup>+</sup> - CH<sub>3</sub>).</p> <p>These data are in accordance with the literature.<sup>4</sup></p>                                                                                                   |



|                                                                                                                                   |                                                                                                                                                                                                                                                                                                                                                                                                                                                                                                                                                                                                                                                                                                                                                                                                                                                                                                                                                                    |
|-----------------------------------------------------------------------------------------------------------------------------------|--------------------------------------------------------------------------------------------------------------------------------------------------------------------------------------------------------------------------------------------------------------------------------------------------------------------------------------------------------------------------------------------------------------------------------------------------------------------------------------------------------------------------------------------------------------------------------------------------------------------------------------------------------------------------------------------------------------------------------------------------------------------------------------------------------------------------------------------------------------------------------------------------------------------------------------------------------------------|
| 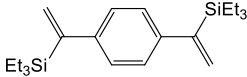 <p style="text-align: center;"><b>P21</b></p>   | <p><sup>1</sup>H NMR (400 MHz, C<sub>6</sub>D<sub>6</sub>, 296K): δ (ppm) 0.70 (q, 12H, <i>J</i><sub>HH</sub> = 7.9 Hz, CH<sub>3</sub>CH<sub>2</sub>-), 0.97 (t, 18H, <i>J</i><sub>HH</sub> = 7.9 Hz, CH<sub>3</sub>CH<sub>2</sub>-), 5.56 (d, 1H, <i>J</i><sub>HH</sub> = 3.1 Hz, =CH), 5.95 (d, 1H, <i>J</i><sub>HH</sub> = 3.1 Hz, =CH), 7.24 (s, 4H, -C<sub>6</sub>H<sub>4</sub>-); <sup>13</sup>C NMR (100 MHz, C<sub>6</sub>D<sub>6</sub>, 296K): δ (ppm) 3.81 (CH<sub>3</sub>CH<sub>2</sub>-), 7.60 (CH<sub>3</sub>CH<sub>2</sub>-), 126.97, 128.81, 143.82 (=CH), 150.43 (=CH); MS <i>m/z</i> (rel, intensity): 58.80 (18), 86.70 (20), 114.80 (11), 130.80 (10), 244.90 (12), 271.00 (16), 272.80 (21), 298.90 (24), 299.80 (13), 300.80 (24), 301.90 (19), 328.80 (18), 329.80 (100, M<sup>+</sup> - C<sub>2</sub>H<sub>5</sub>), 330.70 (36), 331.80 (13), 358.20 (4, M<sup>+</sup>). These data are in accordance with the literature.<sup>4</sup></p> |
|  <p style="text-align: center;"><b>P22</b></p>   | <p><sup>1</sup>H NMR (400 MHz, CDCl<sub>3</sub>, 296K): δ (ppm) 0.60 (q, 12H, <i>J</i><sub>HH</sub> = 7.9 Hz, CH<sub>3</sub>CH<sub>2</sub>-), 0.93 (t, 18H, <i>J</i><sub>HH</sub> = 7.9 Hz, CH<sub>3</sub>CH<sub>2</sub>-), 1.38 – 1.44 (m, 4H, CH<sub>2</sub>), 2.06 – 2.12 (m, 4H, CH<sub>2</sub>), 5.29 (d, 2H, <i>J</i><sub>HH</sub> = 3.0 Hz, =CH), 5.60 – 5.66 (m, 2H, =CH); <sup>13</sup>C NMR (100 MHz, CDCl<sub>3</sub>, 296K): δ (ppm) 2.92 (CH<sub>3</sub>CH<sub>2</sub>-), 7.37 (CH<sub>3</sub>CH<sub>2</sub>-), 28.84 (CH<sub>2</sub>), 36.22 (CH<sub>2</sub>), 124.98 (=CH), 149.08 (=CH); MS <i>m/z</i> (rel, intensity): 115.00 (42), 163.20 (10), 165.00 (43), 197.00 (100, M<sup>+</sup> - SiC<sub>8</sub>H<sub>17</sub>), 214.90 (4), 308.60 (4), 336.50 (2, M<sup>+</sup>). These data are in accordance with the literature.<sup>4</sup></p>                                                                                                  |
|  <p style="text-align: center;"><b>P23</b></p>  | <p><sup>1</sup>H NMR (400 MHz, CDCl<sub>3</sub>, 296K): δ (ppm) 0.57 (q, 6H, <i>J</i><sub>HH</sub> = 7.9 Hz, CH<sub>3</sub>CH<sub>2</sub>-), 0.88 – 0.94 (m, 15H, CH<sub>3</sub>CH<sub>2</sub>- and CH<sub>3</sub>), 1.26 – 1.31 (m, 2H, CH<sub>2</sub>), 1.36 – 1.42 (m, 2H, CH<sub>2</sub>), 2.01 – 2.06 (m, 2H, CH<sub>2</sub>), 2.06 – 2.12 (m, 2H, CH<sub>2</sub>), 5.67 (t, 1H, <i>J</i><sub>HH</sub> = 6.8 Hz, =CH); <sup>13</sup>C NMR (100 MHz, CDCl<sub>3</sub>, 296K): δ (ppm) 3.18 (CH<sub>3</sub>CH<sub>2</sub>-), 7.45 (CH<sub>3</sub>CH<sub>2</sub>-), 13.85, 14.56, 22.83, 23.41, 30.47, 32.28, 137.39, 141.88 (=CH); MS <i>m/z</i> (rel, intensity): 136.00 (1), 108.90 (2), 169.00 (1), 194.80 (10), 195.80 (20), 196.80 (100, M<sup>+</sup> - C<sub>2</sub>H<sub>5</sub>), 226.70 (2, M<sup>+</sup>). These data are in accordance with the literature.<sup>4</sup></p>                                                                         |
|  <p style="text-align: center;"><b>P24</b></p> | <p><sup>1</sup>H NMR (400 MHz, CDCl<sub>3</sub>, 296K): δ (ppm) 0.56 (q, 6H, <i>J</i><sub>HH</sub> = 8.0 Hz, CH<sub>3</sub>CH<sub>2</sub>-), 0.88 (t, 9H, <i>J</i><sub>HH</sub> = 7.6 Hz, CH<sub>3</sub>CH<sub>2</sub>-), 1.85 (s, 3H, CH<sub>3</sub>), 4.38 (dd, 2H, <i>J</i><sub>HH</sub> = 6.2, 0.8 Hz, CH<sub>2</sub>), 5.64 (m, 1H, CH=), 7.70 – 7.74 (m, 2H, CH<sub>Ar</sub>), 7.84 – 7.87 (m, 2H, CH<sub>Ar</sub>); <sup>13</sup>C NMR (100 MHz, CDCl<sub>3</sub>, 296K): δ (ppm) 2.37 (CH<sub>3</sub>CH<sub>2</sub>-), 7.33 (CH<sub>3</sub>CH<sub>2</sub>-), 15.31 (CH<sub>3</sub>-), 35.91 (NCH<sub>2</sub>), 123.20, 126.72, 128.47, 129.32, 132.30, 133.01, 133.82, 138.82 (CH=), 142.12 (CH=), 168.06 (C=O); MS <i>m/z</i> (rel, intensity): 111.00 (3), 130.10 (3), 159.80 (2), 232.10 (4), 244.90 (3), 257.90 (1), 285.80 (100, M<sup>+</sup> - C<sub>2</sub>H<sub>5</sub>), 286.80 (21), 315.70 (2, M<sup>+</sup>).</p>                             |
|  <p style="text-align: center;"><b>P26</b></p> | <p><sup>1</sup>H NMR (400 MHz, CDCl<sub>3</sub>, 296K): δ (ppm) 0.19 (s, 6H, Si(CH<sub>3</sub>)<sub>2</sub>), 0.80 (s, 9H, C(CH<sub>3</sub>)<sub>3</sub>), 5.64 (d, 1H, <i>J</i><sub>HH</sub> = 3.1 Hz, =CH), 5.84 (d, 1H, <i>J</i><sub>HH</sub> = 3.1 Hz, =CH), 7.13 – 7.16 (m, 2H, C<sub>6</sub>H<sub>5</sub>-), 7.18 – 7.27 (m, 1H, C<sub>6</sub>H<sub>5</sub>-), 7.27 – 7.31 (m, 2H, C<sub>6</sub>H<sub>5</sub>-); <sup>13</sup>C NMR (100 MHz, CDCl<sub>3</sub>, 296K): δ (ppm) -4.94 (Si(CH<sub>3</sub>)<sub>2</sub>), 17.20 (C(CH<sub>3</sub>)<sub>3</sub>), 26.87 (C(CH<sub>3</sub>)<sub>3</sub>), 125.96, 127.18, 127.94, 129.76, 146.22 (=CH), 151.82 (=CH); MS <i>m/z</i> (rel, intensity): 73.00 (12), 201.20 (14), 203.00 (100, M<sup>+</sup> - CH<sub>3</sub>), 203.80 (18), 218.20 (3, M<sup>+</sup>). These data are in accordance with the literature.<sup>4</sup></p>                                                                            |

|                                                                                                                                   |                                                                                                                                                                                                                                                                                                                                                                                                                                                                                                                                                                                                                                                                                                                                                                                                                                                                                                                                                     |
|-----------------------------------------------------------------------------------------------------------------------------------|-----------------------------------------------------------------------------------------------------------------------------------------------------------------------------------------------------------------------------------------------------------------------------------------------------------------------------------------------------------------------------------------------------------------------------------------------------------------------------------------------------------------------------------------------------------------------------------------------------------------------------------------------------------------------------------------------------------------------------------------------------------------------------------------------------------------------------------------------------------------------------------------------------------------------------------------------------|
| 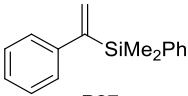 <p style="text-align: center;"><b>P27</b></p>   | <p><sup>1</sup>H NMR (400 MHz, CDCl<sub>3</sub>, 296K): δ (ppm) 0.44 (s, 6H, CH<sub>3</sub>), 5.70 (d, 1H, <i>J</i><sub>HH</sub> = 2.9 Hz, =CH), 6.02 (d, 1H, <i>J</i><sub>HH</sub> = 2.9 Hz, =CH), 7.13-7.18 (m, 2H, Ph), 7.19-7.25, 7.27-7.29 (m, 3H, Ph), 7.36-7.40 (m, 3H, Ph), 7.57-7.60 (m, 2H, Ph); <sup>13</sup>C NMR (100 MHz, CDCl<sub>3</sub>, 296K): δ (ppm) -2.34 (CH<sub>3</sub>), 126.36, 126.83, 127.80, 128.07, 129.04, 129.13, 134.01, 138.25, 144.12 (=CH), 150.94 (=CH); MS <i>m/z</i> (rel, intensity): 134.80 (18), 197.20 (18), 211.20 (21), 212.00 (25), 213.50 (30), 214.90 (36), 215.80 (45), 216.80 (49), 217.50 (53), 218.10 (56), 218.70 (60), 219.30 (63), 220.80 (69), 221.50 (71), 223.30 (100, M<sup>+</sup> - CH<sub>3</sub>), 224.30 (47), 225.20 (20), 234.20 (20), 235.20 (21), 236.20 (22), 237.60 (27), 238.20 (30, M<sup>+</sup>).</p> <p>These data are in accordance with the literature.<sup>4</sup></p> |
|  <p style="text-align: center;"><b>P28</b></p>   | <p><sup>1</sup>H NMR (400 MHz, CDCl<sub>3</sub>, 296K): δ (ppm) 5.75 (d, 1H, <i>J</i><sub>HH</sub> = 2.7 Hz, =CH), 6.35 (d, 1H, <i>J</i><sub>HH</sub> = 2.7 Hz, =CH), 7.21 – 7.26 (m, 5H, C<sub>6</sub>H<sub>5</sub>-), 7.21 – 7.26 (m, 5H, C<sub>6</sub>H<sub>5</sub>-), 7.36 – 7.40 (m, 5H, C<sub>6</sub>H<sub>5</sub>-), 7.43 – 7.48 (m, 4H, C<sub>6</sub>H<sub>5</sub>-), 7.57 – 7.59 (m, 4H, C<sub>6</sub>H<sub>5</sub>-), 7.63 – 7.67 (m, 1H, C<sub>6</sub>H<sub>5</sub>-); <sup>13</sup>C NMR (100 MHz, CDCl<sub>3</sub>, 296K): δ (ppm) 126.69, 127.41, 127.77, 127.89, 128.09, 129.49, 133.93, 134.15, 135.99, 136.35, 143.84, 147.19, 148.83; MS <i>m/z</i> (rel, intensity): 258.30 (30), 259.20 (67), 260.20 (20), 284.50 (54), 285.20 (51), 362.00 (100, M<sup>+</sup>).</p> <p>These data are in accordance with the literature.<sup>4</sup></p>                                                                                      |
|  <p style="text-align: center;"><b>P29</b></p> | <p><sup>1</sup>H NMR (400 MHz, CDCl<sub>3</sub>, 296K): δ (ppm) 0.07 (s, 9H, OSi(CH<sub>3</sub>)<sub>3</sub>), 0.24 (s, 6H, OSi(CH<sub>3</sub>)<sub>2</sub>), 5.68 (d, 1H, <i>J</i><sub>HH</sub> = 3.0 Hz, =CH), 5.90 (d, 1H, <i>J</i><sub>HH</sub> = 3.0 Hz, =CH), 7.21 – 7.26 (m, 1H, C<sub>6</sub>H<sub>5</sub>), 7.30 – 7.34 (m, 4H, C<sub>6</sub>H<sub>5</sub>); <sup>13</sup>C NMR (100 MHz, CDCl<sub>3</sub>, 296K): δ (ppm) 0.97 (CH<sub>2</sub>), 1.84 (CH<sub>3</sub>), 126.39, 126.82, 127.26, 128.08, 143.66 (=CH), 152.61 (=CH); MS <i>m/z</i> (rel, intensity): 234.30 (14), 235.20 (100, M<sup>+</sup> - CH<sub>3</sub>), 236.00 (19), 250.70 (1, M<sup>+</sup>).</p> <p>These data are in accordance with the literature.<sup>4</sup></p>                                                                                                                                                                                           |
|  <p style="text-align: center;"><b>P31</b></p> | <p><sup>1</sup>H NMR (400 MHz, CDCl<sub>3</sub>, 296K): δ (ppm) 5.40 (s, 1H, SiH), 5.69 (d, 1H, <i>J</i><sub>HH</sub> = 2.5 Hz, =CH), 6.29 (dd, 1H, <i>J</i><sub>HH</sub> = 2.5, 1.0 Hz, =CH), 7.17 – 7.25 (m, 2H, C<sub>6</sub>H<sub>5</sub>-), 7.27 – 7.31 (m, 1H, C<sub>6</sub>H<sub>5</sub>-), 7.34 – 7.41 (m, 8H, C<sub>6</sub>H<sub>5</sub>-), 7.56 – 7.59 (m, 4H, C<sub>6</sub>H<sub>5</sub>-); <sup>13</sup>C NMR (100 MHz, CDCl<sub>3</sub>, 296K): δ (ppm) 126.70, 127.04, 127.72, 128.01, 128.37, 129.78, 132.11, 134.09, 135.75, 142.91 (=CH), 145.87 (=CH); MS <i>m/z</i> (rel, intensity): 103.00 (7), 130.10 (2), 180.50 (5), 204.90 (7), 207.00 (7), 225.20 (1), 232.20 (1), 259.10 (8), 271.00 (3), 278.80 (2), 286.00 (100, M<sup>+</sup>).</p> <p>These data are in accordance with the literature.<sup>10</sup></p>                                                                                                             |
|  <p style="text-align: center;"><b>P32</b></p> | <p><sup>1</sup>H NMR (400 MHz, CDCl<sub>3</sub>, 296K): δ (ppm) 5.39 (s, 1H, SiH), 5.69 (d, 1H, <i>J</i><sub>HH</sub> = 2.3 Hz, =CH), 6.28 (dd, 1H, <i>J</i><sub>HH</sub> = 2.3, 0.9 Hz, =CH), 6.93 – 6.98 (m, 2H, -C<sub>6</sub>H<sub>4</sub>-F), 7.29 – 7.33 (m, 2H, -C<sub>6</sub>H<sub>4</sub>-F), 7.36 – 7.44 (m, 7H, -C<sub>6</sub>H<sub>5</sub>), 7.56 – 7.58 (m, 3H, -C<sub>6</sub>H<sub>5</sub>); <sup>13</sup>C NMR (100 MHz, CDCl<sub>3</sub>, 296K): δ (ppm) 115.22 (d, <i>J</i> = 21.4 Hz), 128.08, 128.23 (d, <i>J</i> = 8.0 Hz), 128.80 (d, <i>J</i> = 8.0 Hz), 129.89, 132.04, 132.72, 135.71, 144.87 (d, <i>J</i> = 2.7 Hz), 148.27 (=CH<sub>2</sub>), 162.08 (d, <i>J</i> = 246.1 Hz); MS <i>m/z</i> (rel, intensity): 299.10 (10), 299.70 (12), 301.60 (21), 303.20 (100, M<sup>+</sup> - H), 304.20 (89, M<sup>+</sup>).</p> <p>These data are in accordance with the literature.<sup>10</sup></p>                              |

|                                                                                                                                 |                                                                                                                                                                                                                                                                                                                                                                                                                                                                                                                                                                                                                                                                                                                                                                                                                                                                                                                                                                                                                                        |
|---------------------------------------------------------------------------------------------------------------------------------|----------------------------------------------------------------------------------------------------------------------------------------------------------------------------------------------------------------------------------------------------------------------------------------------------------------------------------------------------------------------------------------------------------------------------------------------------------------------------------------------------------------------------------------------------------------------------------------------------------------------------------------------------------------------------------------------------------------------------------------------------------------------------------------------------------------------------------------------------------------------------------------------------------------------------------------------------------------------------------------------------------------------------------------|
| 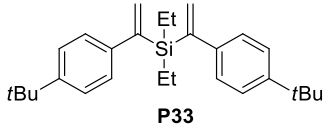 <p style="text-align: center;"><b>P33</b></p> | <p><sup>1</sup>H NMR (400 MHz, CDCl<sub>3</sub>, 296K): δ (ppm) 0.61 – 0.69 (m, 2H, CH<sub>3</sub>CH<sub>2</sub>-), 0.82 – 0.88 (m, 8H, CH<sub>3</sub>CH<sub>2</sub>-), 1.31 (s, 18H, C(CH<sub>3</sub>)<sub>3</sub>), 5.66 (d, 2H, J<sub>HH</sub> = 2.8 Hz, =CH), 6.04 (d, 2H, J<sub>HH</sub> = 2.8 Hz, =CH), 7.20 (d, 2H, J<sub>HH</sub> = 8.6 Hz, -C<sub>6</sub>H<sub>4</sub>-tBu), 7.26 (d, 2H, J<sub>HH</sub> = 2.8 Hz, -C<sub>6</sub>H<sub>4</sub>-tBu); <sup>13</sup>C NMR (100 MHz, CDCl<sub>3</sub>, 296K): δ (ppm) 3.14 (CH<sub>3</sub>CH<sub>2</sub>-), 7.09 (CH<sub>3</sub>CH<sub>2</sub>-), 31.35 (C(CH<sub>3</sub>)<sub>3</sub>), 34.37 (C(CH<sub>3</sub>)<sub>3</sub>), 124.93, 126.37, 129.33, 141.29, 148.91(=CH<sub>2</sub>), 149.21 (=CH<sub>2</sub>); MS m/z (rel, intensity): 57.20 (100, C<sub>4</sub>H<sub>9</sub>), 289.20 (17), 290.80 (17), 291.50 (23), 319.50 (16), 346.70 (23), 347.60 (70), 348.50 (47), 349.50 (26), 375.70 (41), 376.70 (26), 389.70 (16), 403.50 (34), 404.20 (88, M<sup>+</sup>).</p> |
|  <p style="text-align: center;"><b>P34</b></p> | <p><sup>1</sup>H NMR (400 MHz, CDCl<sub>3</sub>, 296K): δ (ppm) 0.76 – 0.83 (m, 2H, CH<sub>3</sub>CH<sub>2</sub>-), 0.84 – 1.00 (m, 8H, CH<sub>3</sub>CH<sub>2</sub>-), 5.66 (d, 2H, J<sub>HH</sub> = 2.8 Hz, =CH), 5.99 (d, 2H, J<sub>HH</sub> = 2.8 Hz, =CH), 6.94 (d, 4H, J<sub>HH</sub> = 8.9 Hz, -C<sub>6</sub>H<sub>4</sub>-F), 7.17 (dd, 4H, J<sub>HH</sub> = 8.9, 5.0 Hz, -C<sub>6</sub>H<sub>4</sub>-F); <sup>13</sup>C NMR (100 MHz, CDCl<sub>3</sub>, 296K): δ (ppm) 3.00 (CH<sub>3</sub>CH<sub>2</sub>-), 6.94 (CH<sub>3</sub>CH<sub>2</sub>-), 114.93 (d, J = 21.3 Hz), 128.14 (d, J = 8.0 Hz), 128.80 (br s), 130.19, 140.26 (d, J = 3.6 Hz), 148.27 (=CH<sub>2</sub>), 161.83 (d, J = 245.0 Hz); MS m/z (rel, intensity): 203.50 (15), 271.00 (26), 299.10 (100, M<sup>+</sup> - C<sub>2</sub>H<sub>5</sub>), 299.80 (29), 327.80 (29), 328.80 (10, M<sup>+</sup>).</p>                                                                                                                                                 |

#### 4. NMR spectra of isolated products P1-P34

##### Product 1

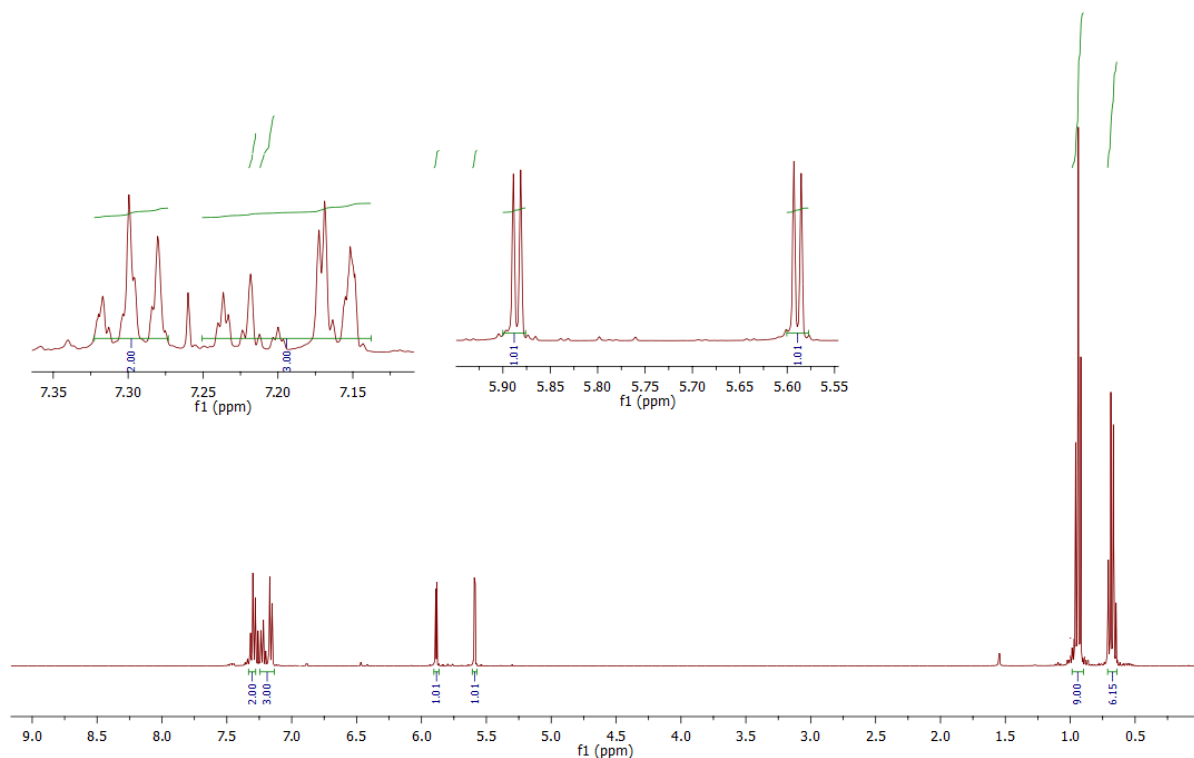

Figure S4.  $^1\text{H}$  NMR (400 MHz,  $\text{CDCl}_3$ ) of product **P1**

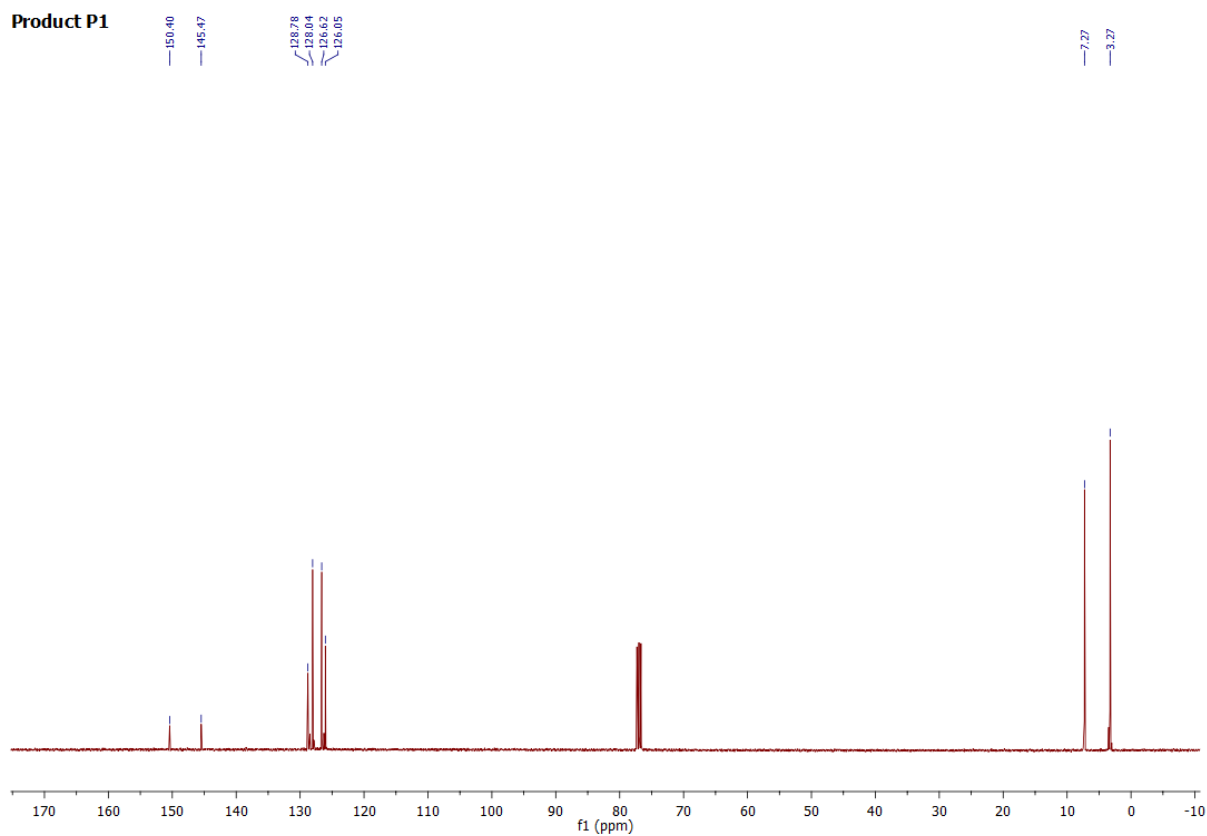

Figure S5.  $^{13}\text{C}$  NMR (101 MHz,  $\text{CDCl}_3$ ) of product **P1**

**Product P2**

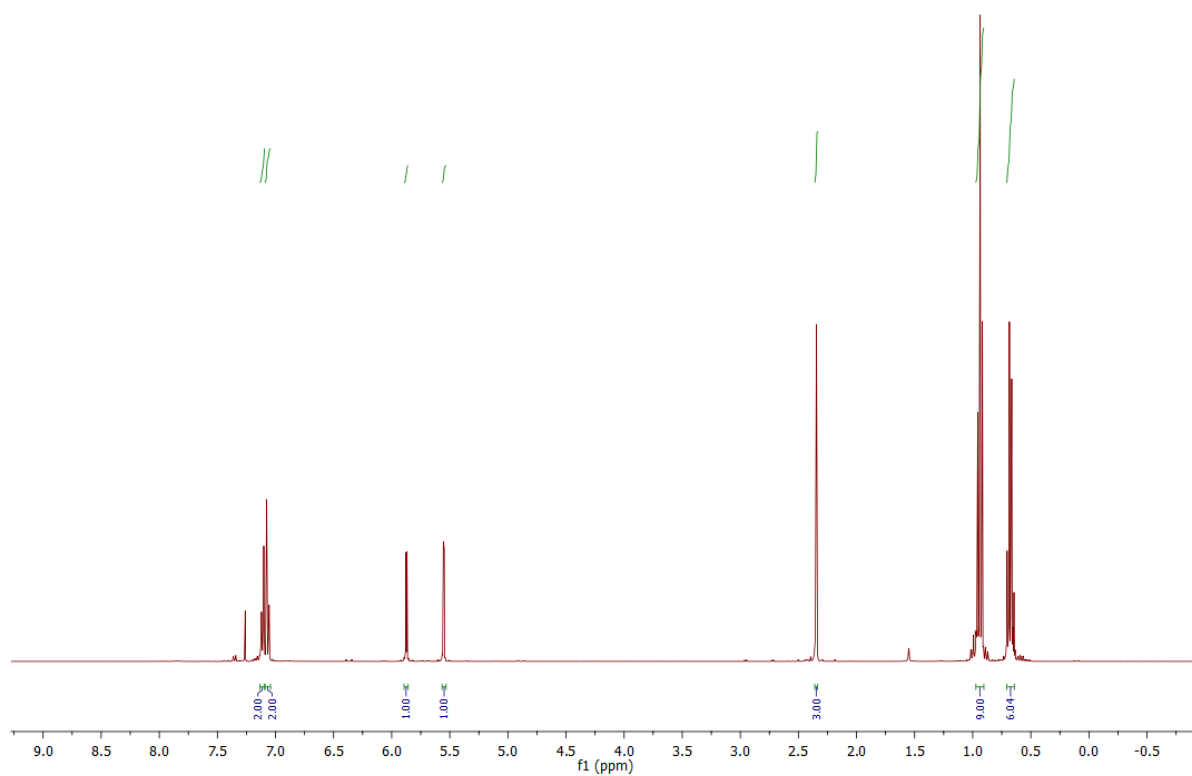

Figure S6. <sup>1</sup>H NMR (400 MHz, CDCl<sub>3</sub>) of product **P2**

**Product P2**

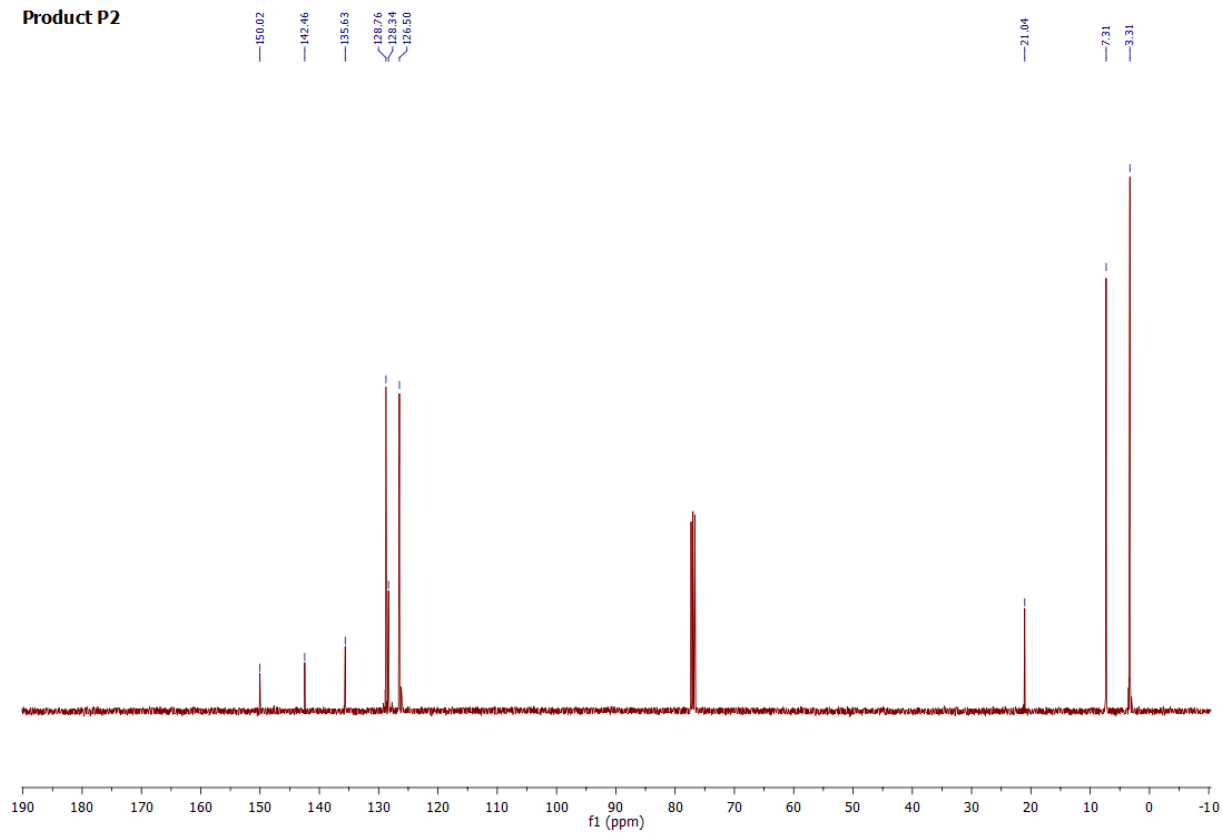

Figure S7. <sup>13</sup>C NMR (101 MHz, CDCl<sub>3</sub>) of product **P2**

**Product P3**

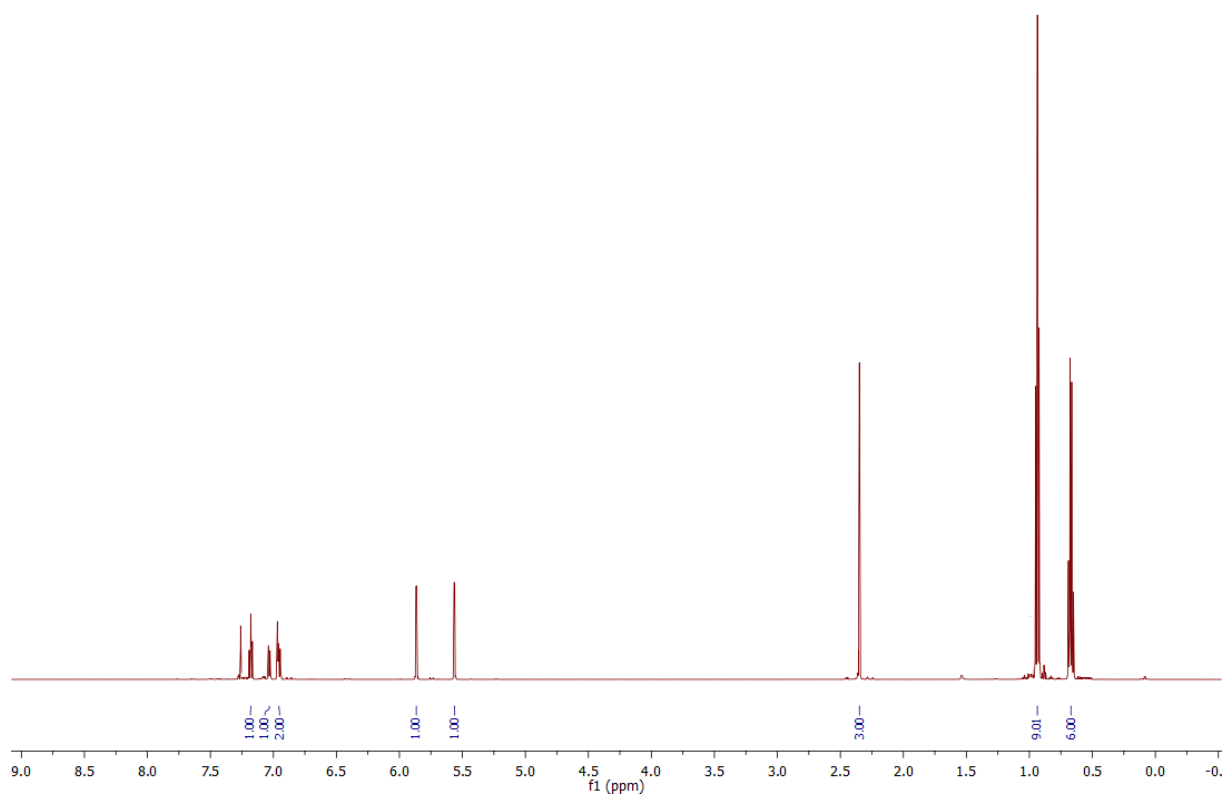

Figure S8. <sup>1</sup>H NMR (400 MHz, CDCl<sub>3</sub>) of product **P3**

**Product P3**

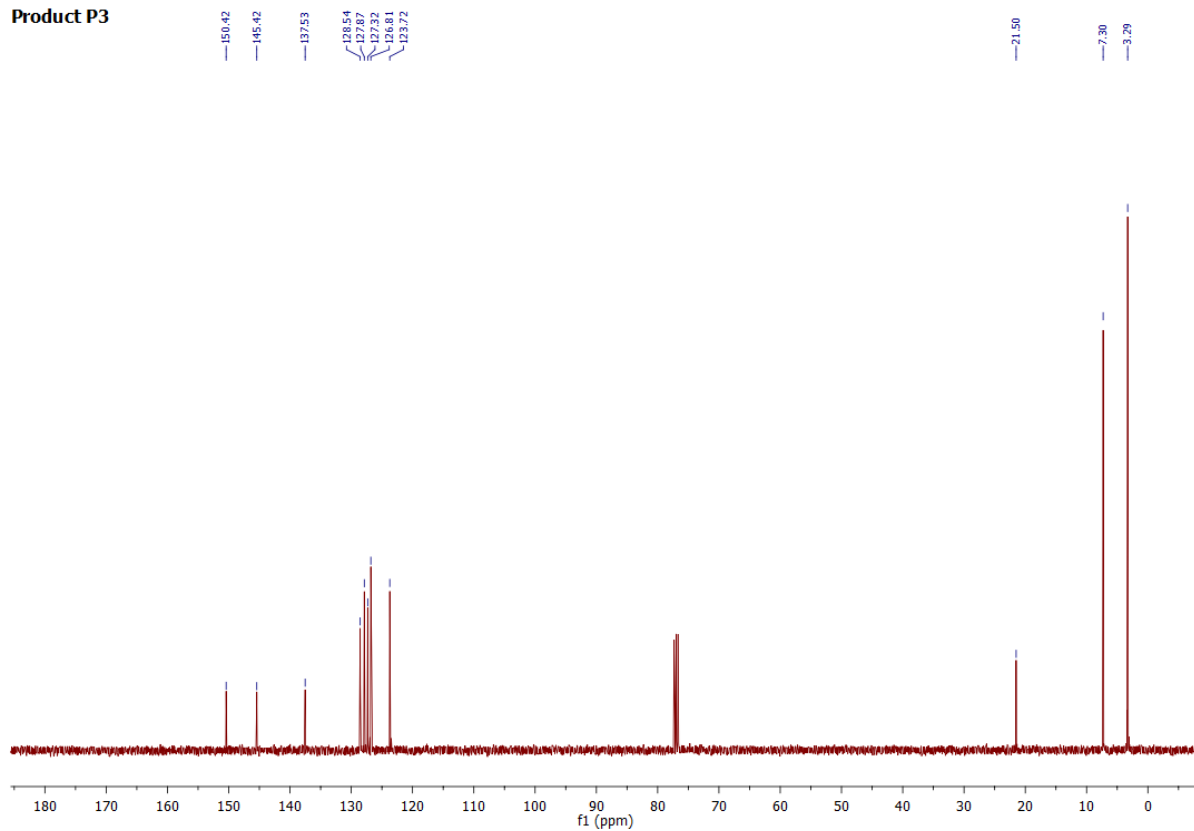

Figure S9. <sup>13</sup>C NMR (101 MHz, CDCl<sub>3</sub>) of product **P3**

Product P4

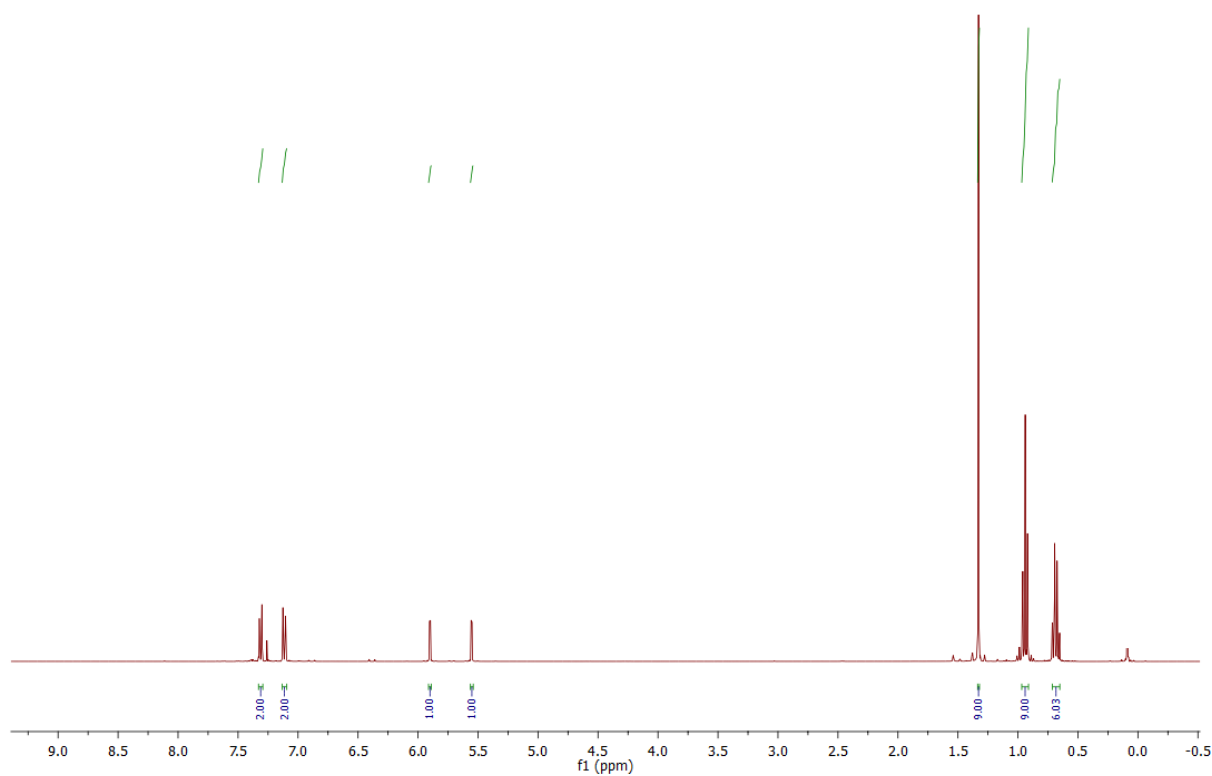

Figure S10. <sup>1</sup>H NMR (400 MHz, CDCl<sub>3</sub>) of product **P4**

Product P4

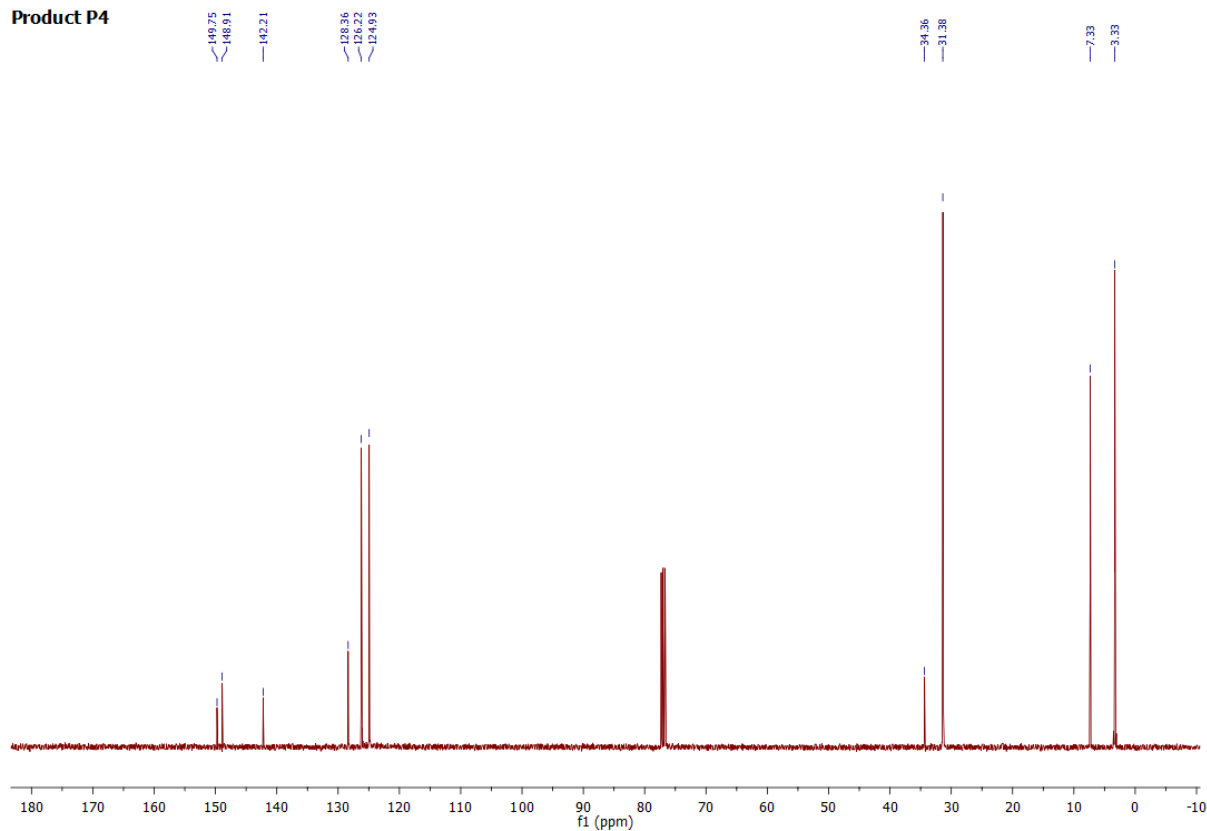

Figure S11. <sup>13</sup>C NMR (101 MHz, CDCl<sub>3</sub>) of product **P4**

**Product P5**

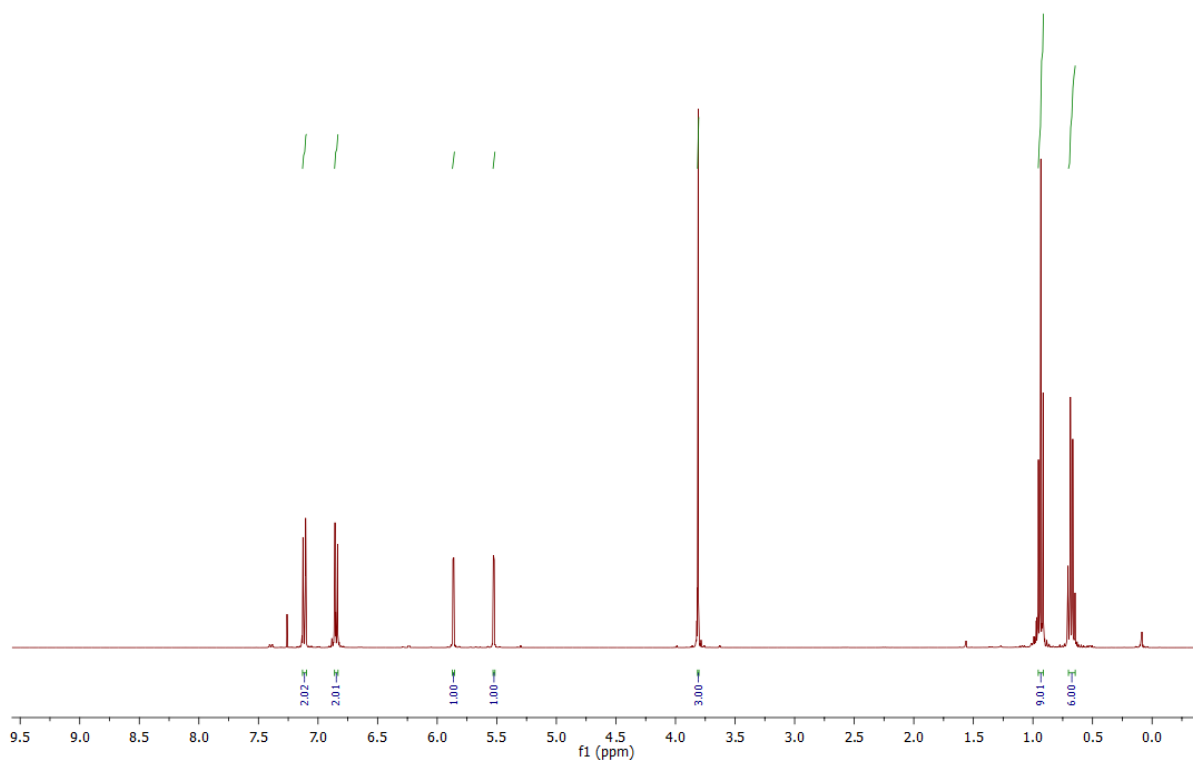

Figure S12. <sup>1</sup>H NMR (400 MHz, CDCl<sub>3</sub>) of product **P5**

**Product P5**

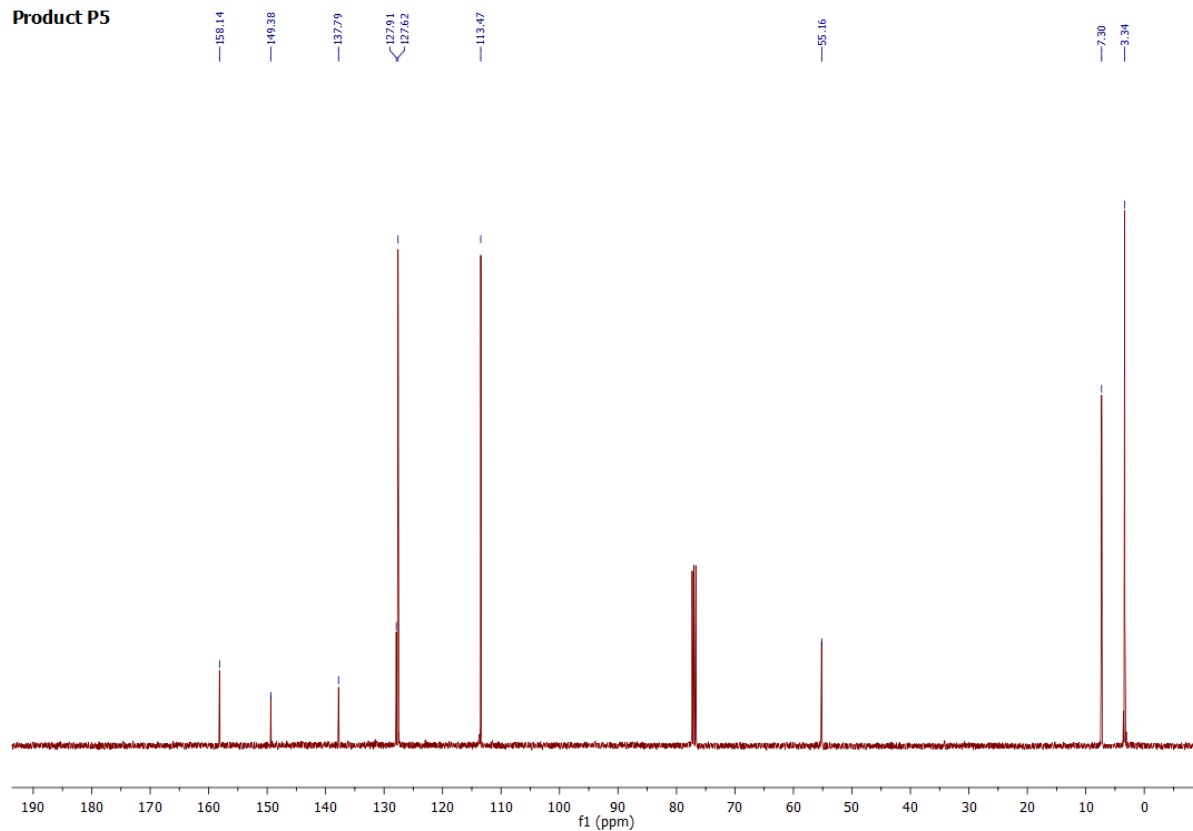

Figure S13. <sup>13</sup>C NMR (101 MHz, CDCl<sub>3</sub>) of product **P5**



**Product P6**

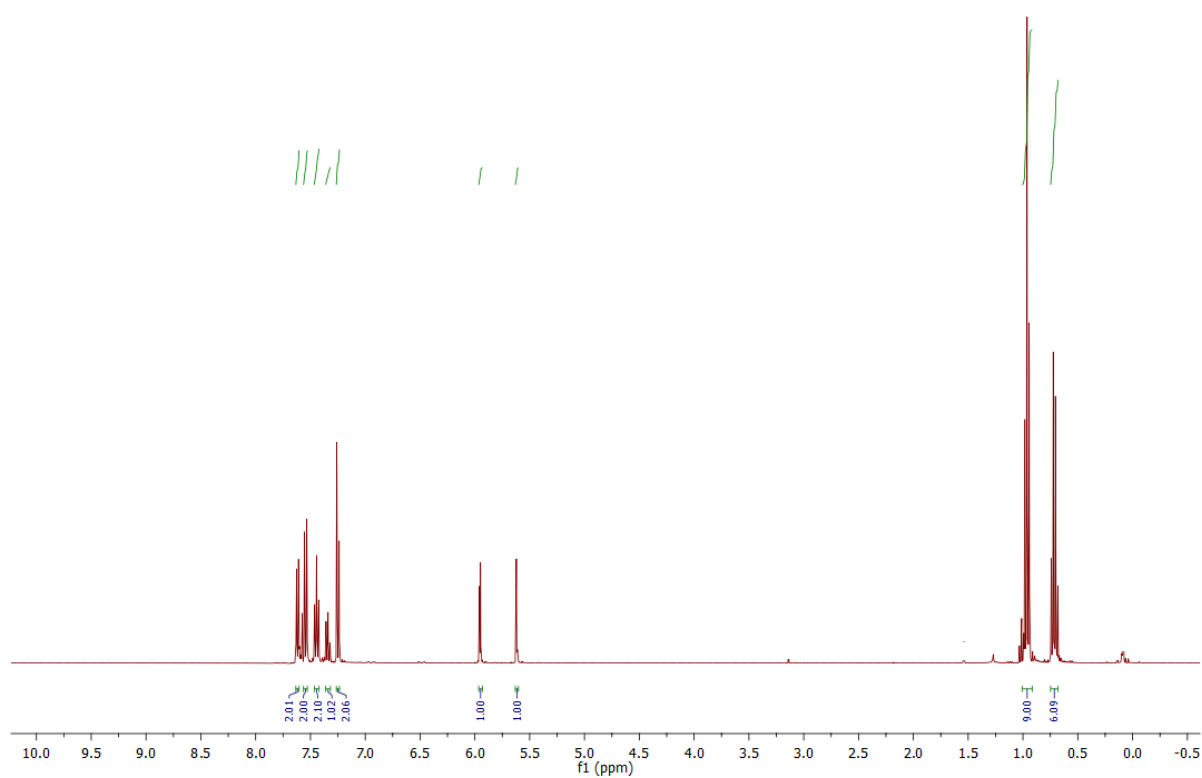

Figure S14. <sup>1</sup>H NMR (400 MHz, CDCl<sub>3</sub>) of product **P6**

**Product P6**

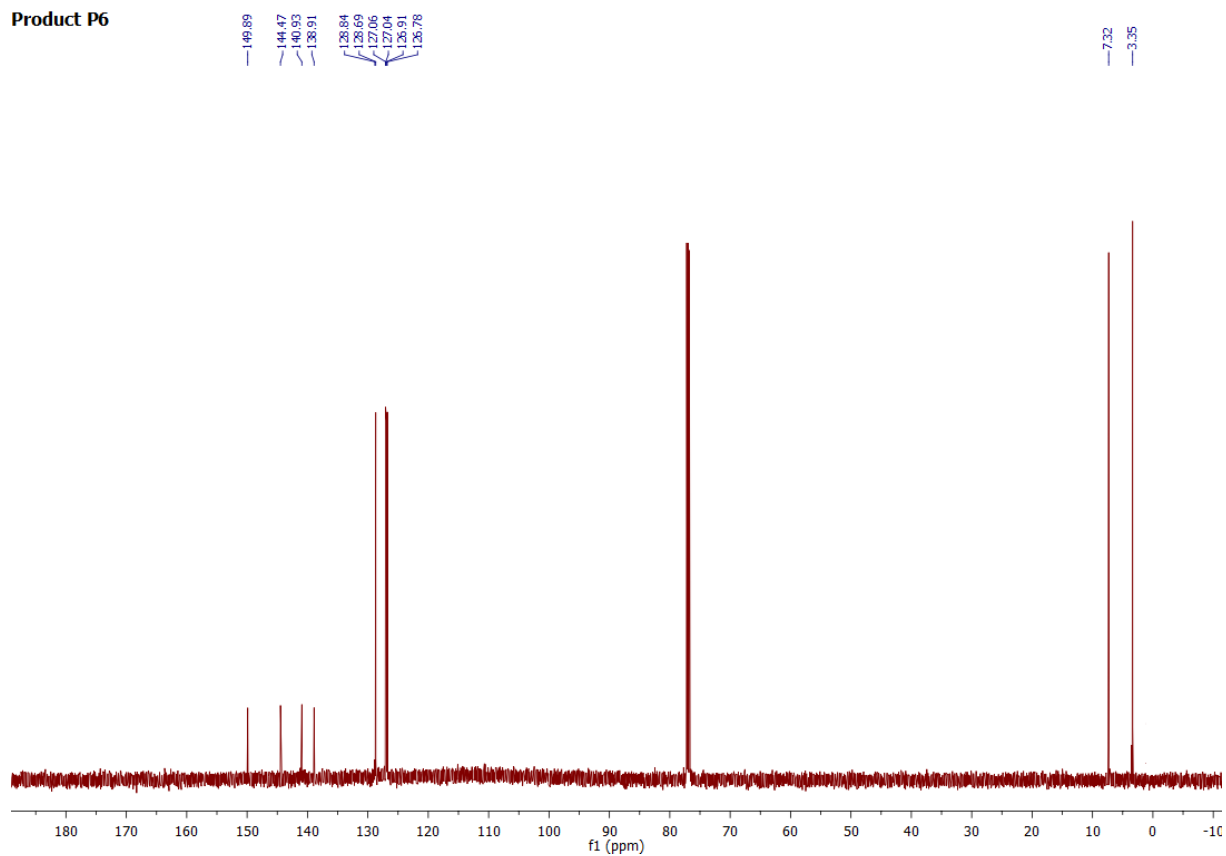

Figure S15. <sup>13</sup>C NMR (101 MHz, CDCl<sub>3</sub>) of product **P6**

**Product P7**

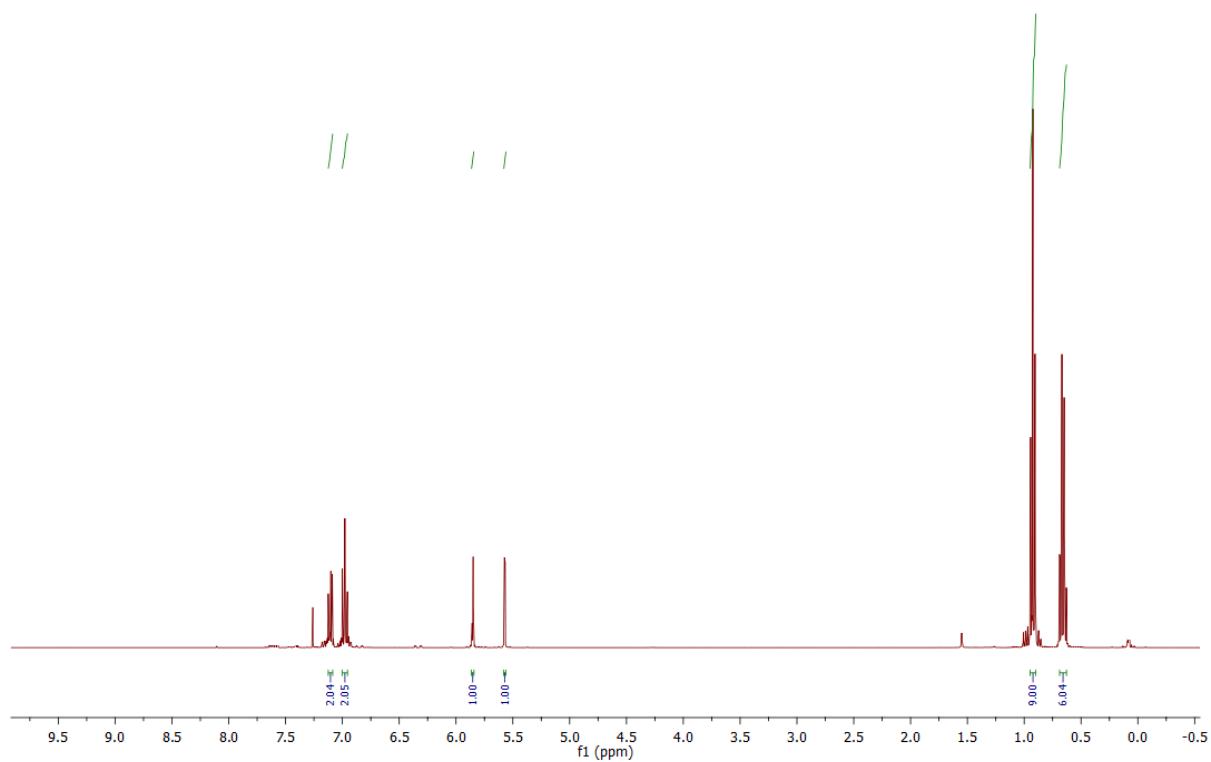

Figure S16.  $^1\text{H}$  NMR (400 MHz,  $\text{CDCl}_3$ ) of product **P7**

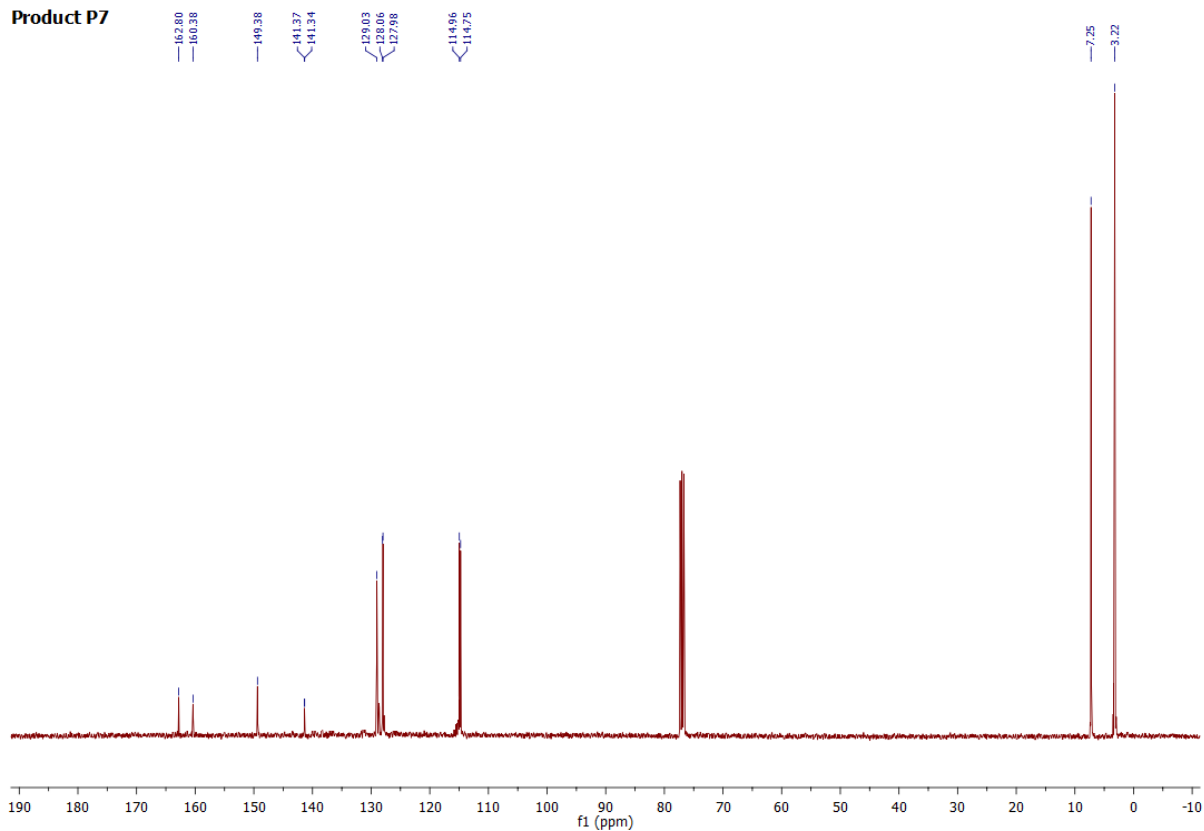

Figure S17.  $^{13}\text{C}$  NMR (101 MHz,  $\text{CDCl}_3$ ) of product **P7**

**Product P8**

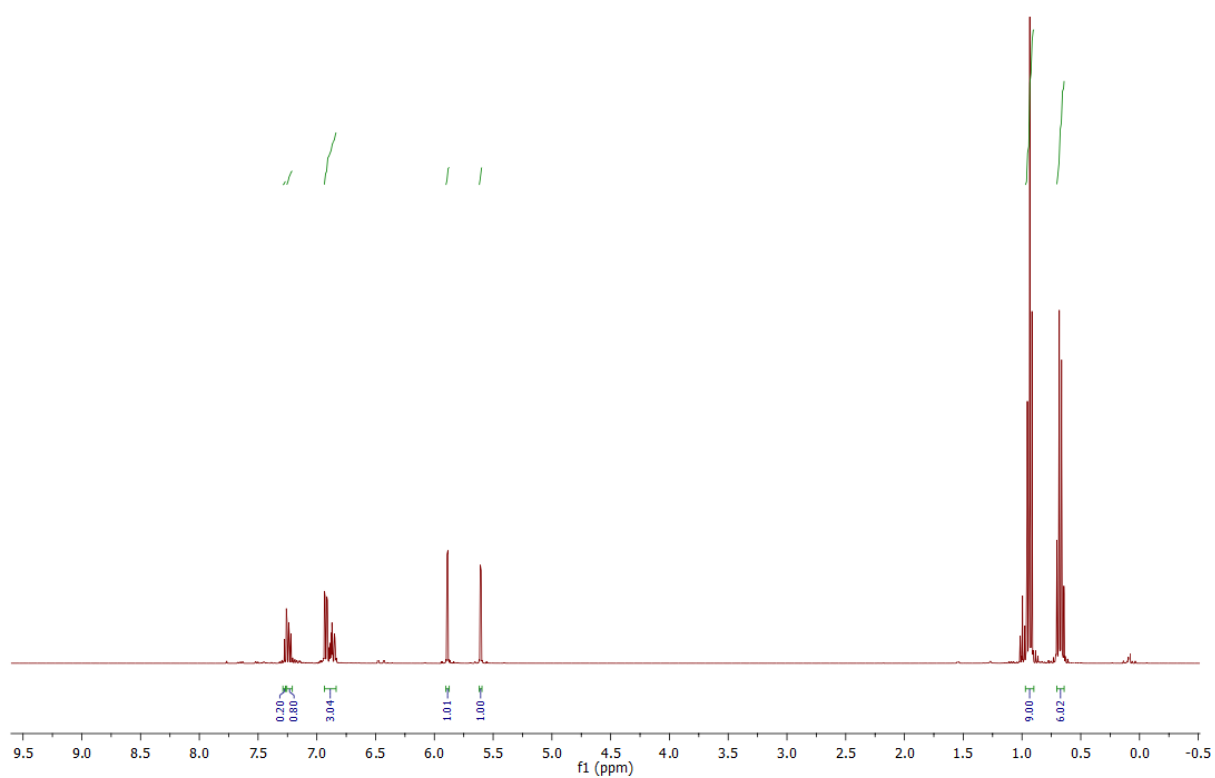

Figure S18. <sup>1</sup>H NMR (400 MHz, CDCl<sub>3</sub>) of product **P8**

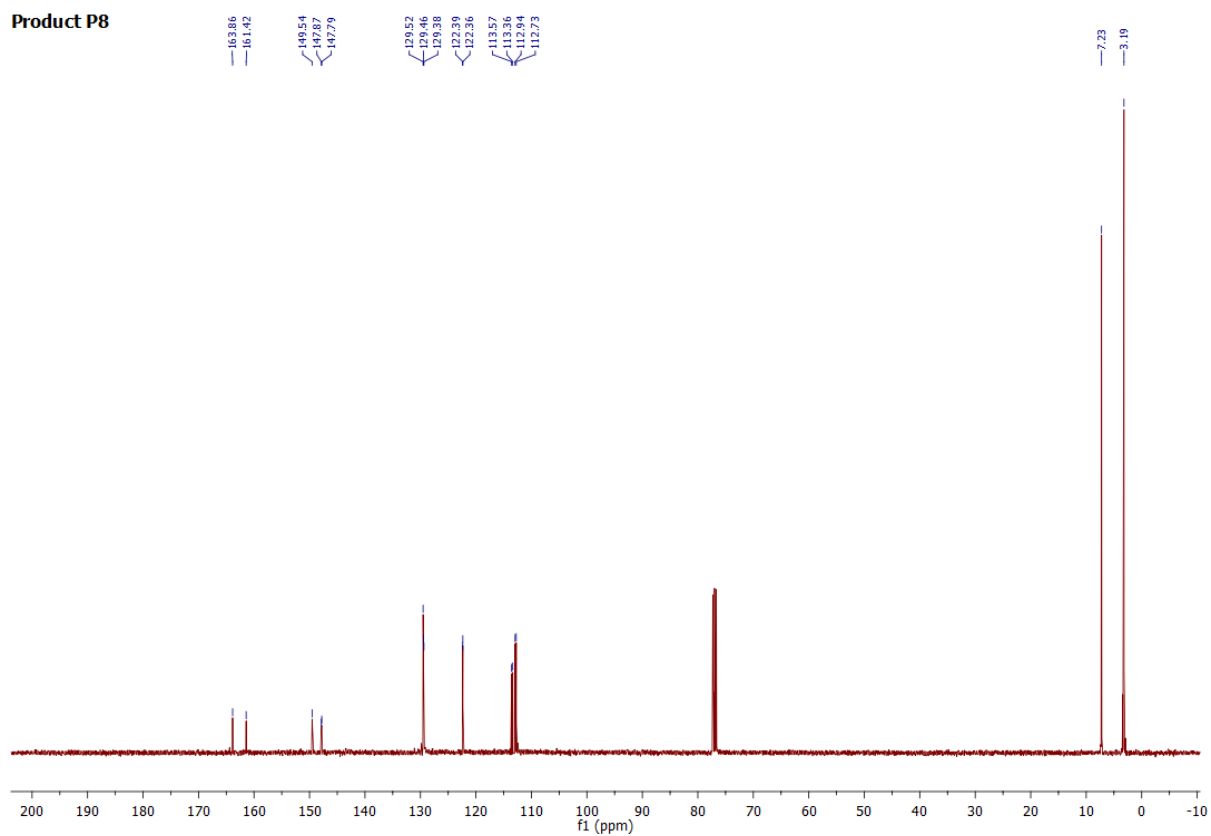

Figure S19. <sup>13</sup>C NMR (101 MHz, CDCl<sub>3</sub>) of product **P8**

**Product P9**

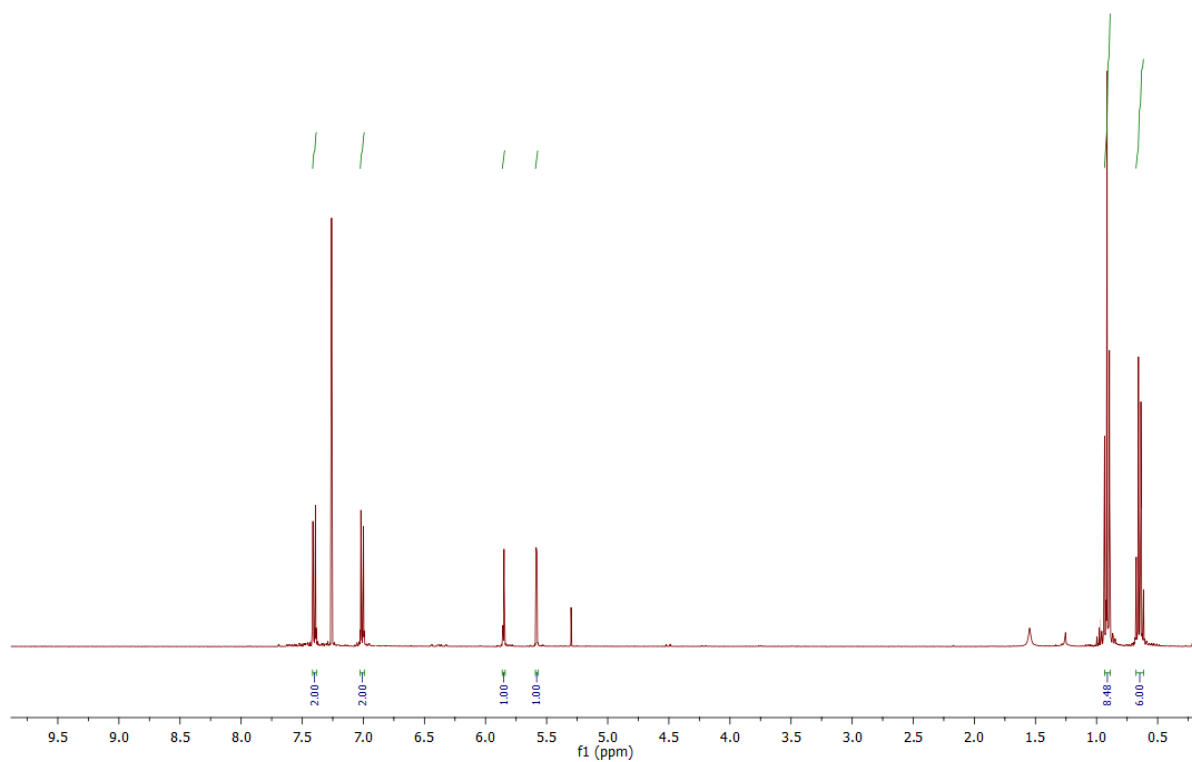

Figure S20. <sup>1</sup>H NMR (400 MHz, CDCl<sub>3</sub>) of product **P9**

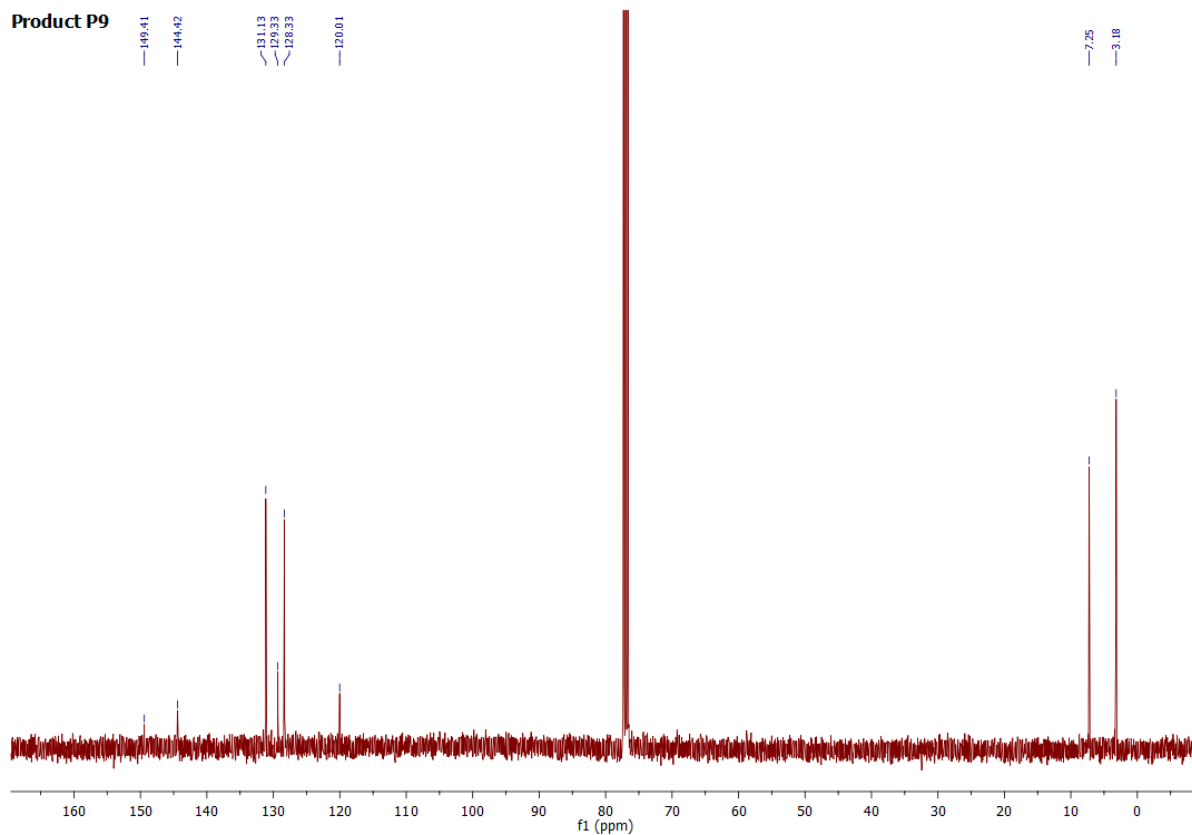

Figure S21. <sup>13</sup>C NMR (101 MHz, CDCl<sub>3</sub>) of product **P9**

Product P10

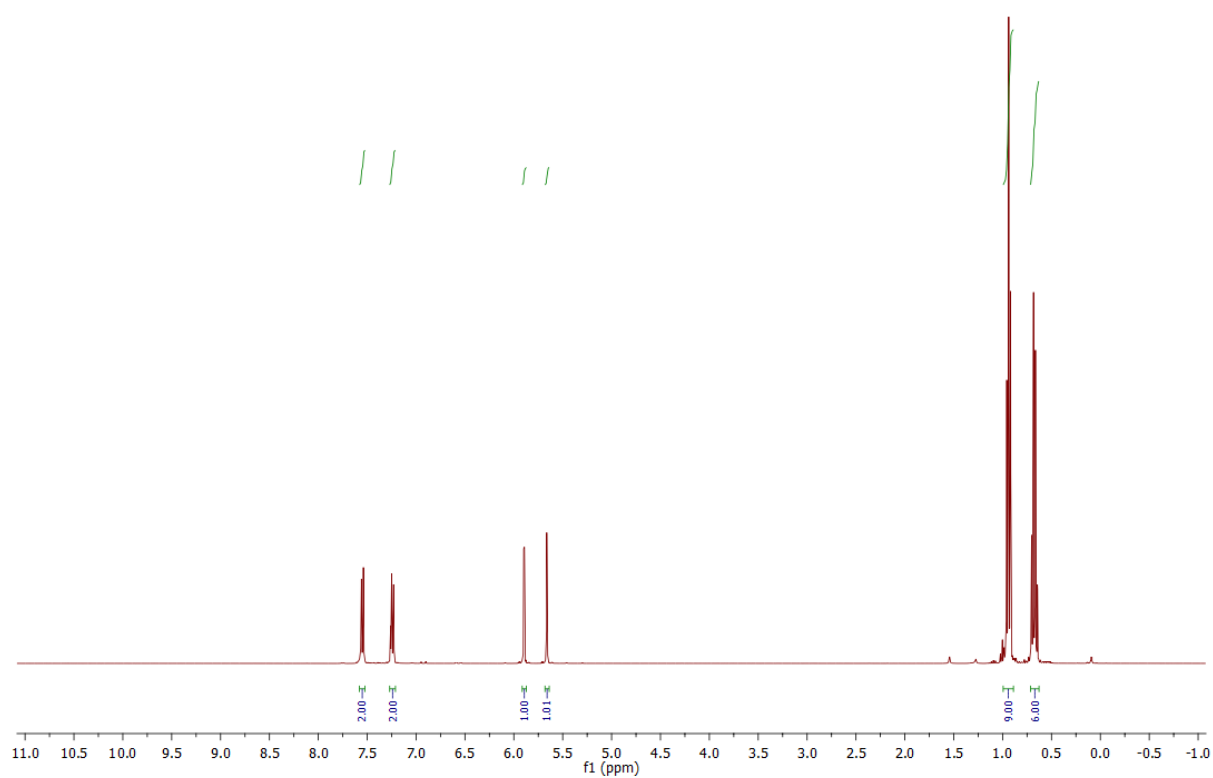

Figure S22. <sup>1</sup>H NMR (400 MHz, CDCl<sub>3</sub>) of product **P10**

Product P10

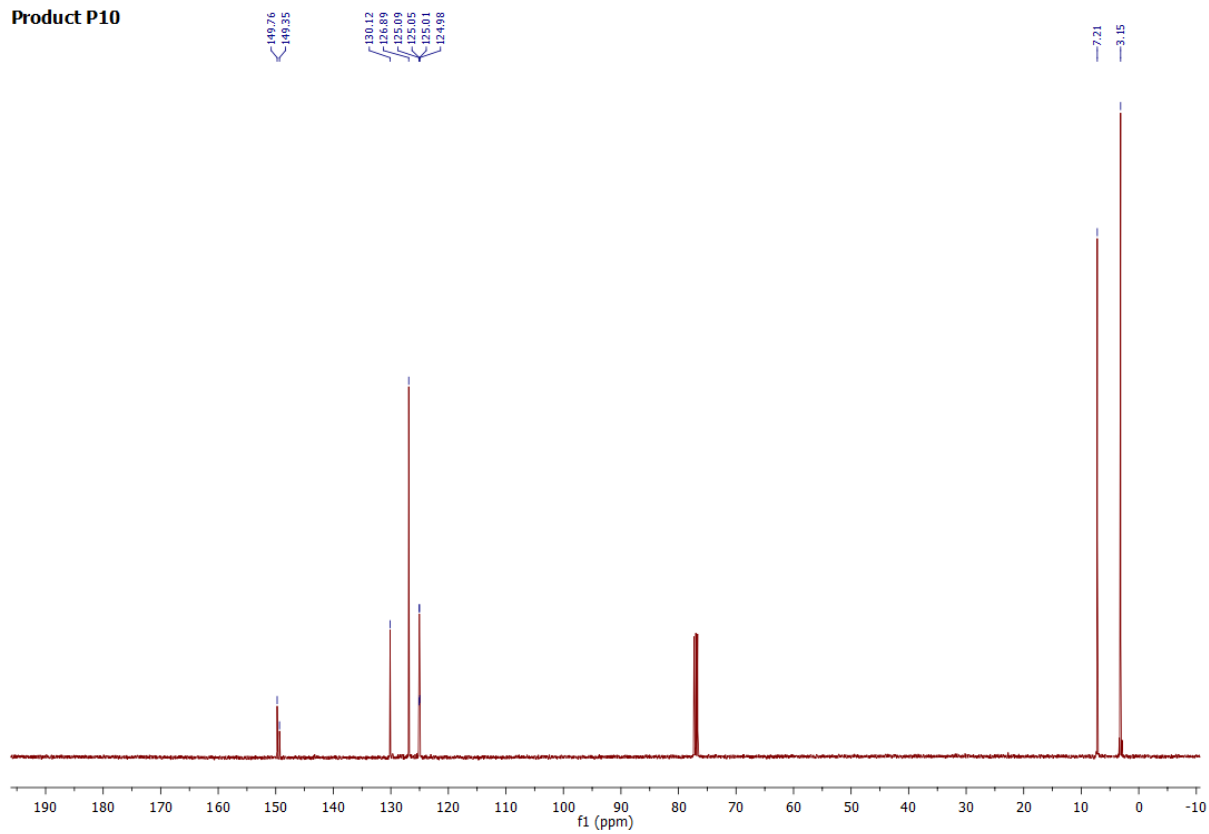

Figure S23. <sup>13</sup>C NMR (101 MHz, CDCl<sub>3</sub>) of product **P10**

**Product P11**

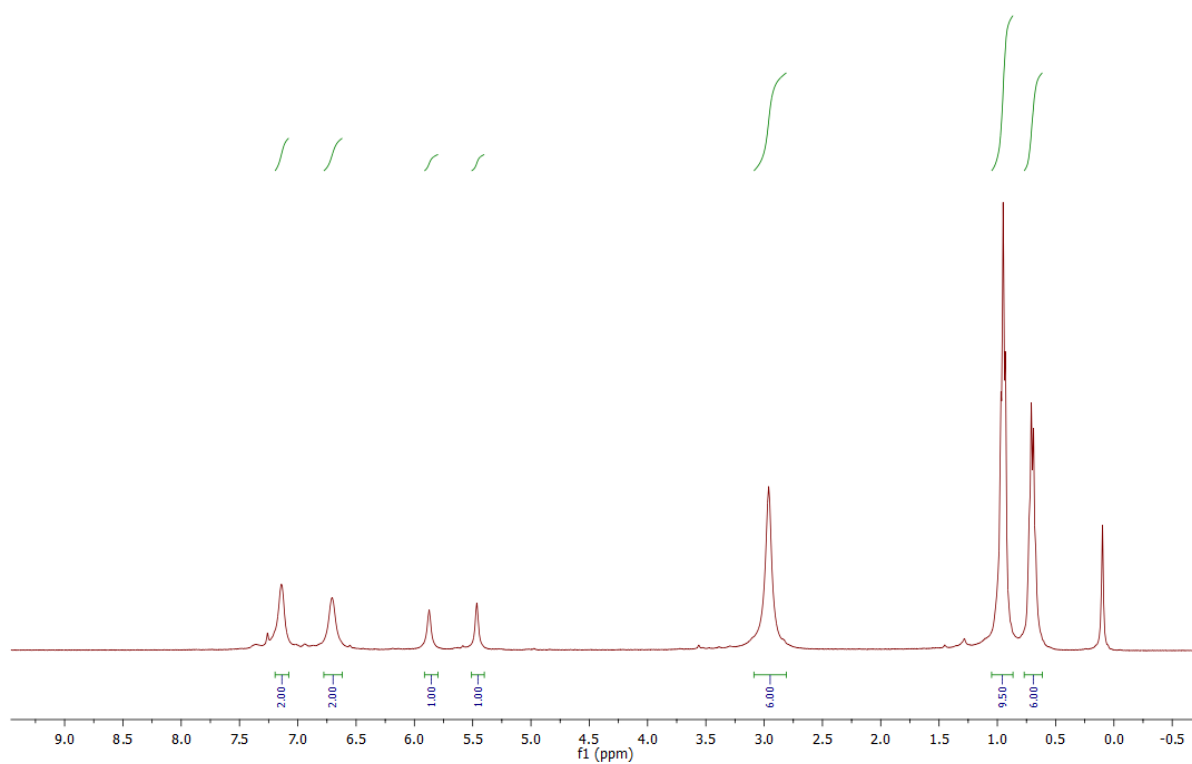

Figure S24. <sup>1</sup>H NMR (400 MHz, CDCl<sub>3</sub>) of product **P11**

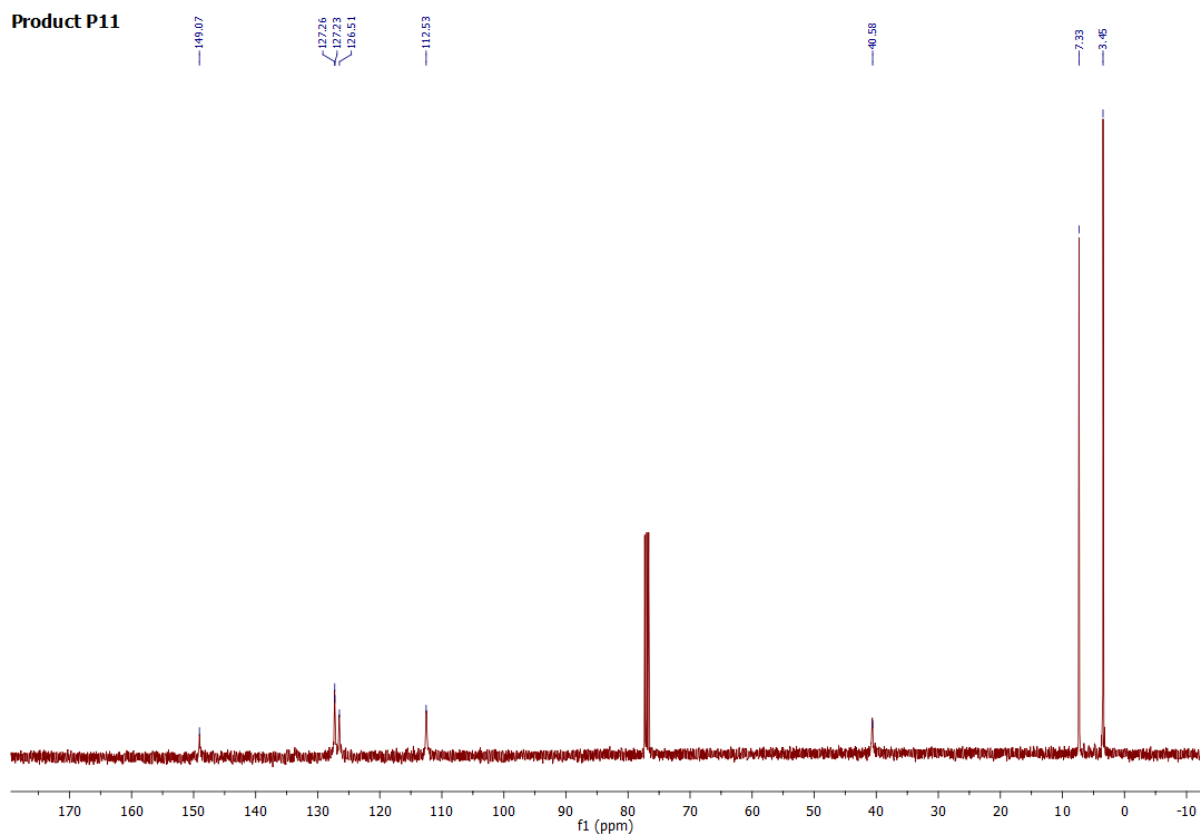

Figure S25. <sup>13</sup>C NMR (101 MHz, CDCl<sub>3</sub>) of product **P11**

**Product P12**

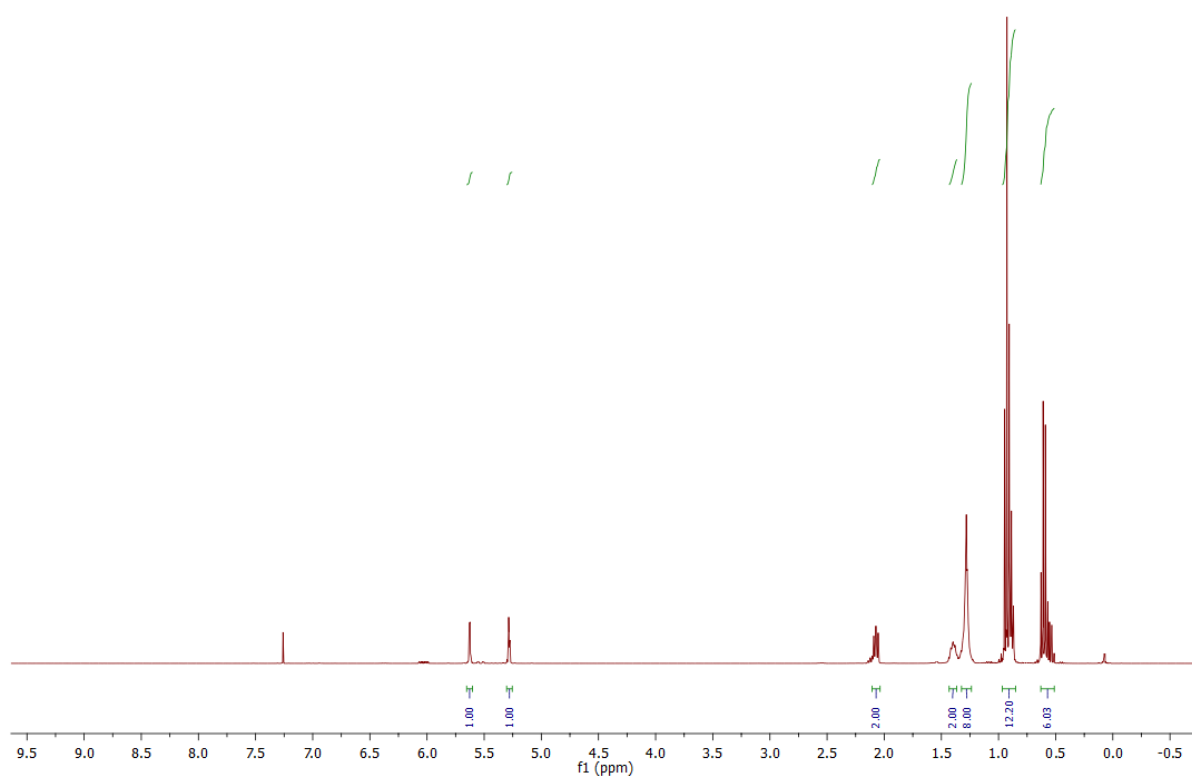

Figure S26. <sup>1</sup>H NMR (400 MHz, CDCl<sub>3</sub>) of product **P12**

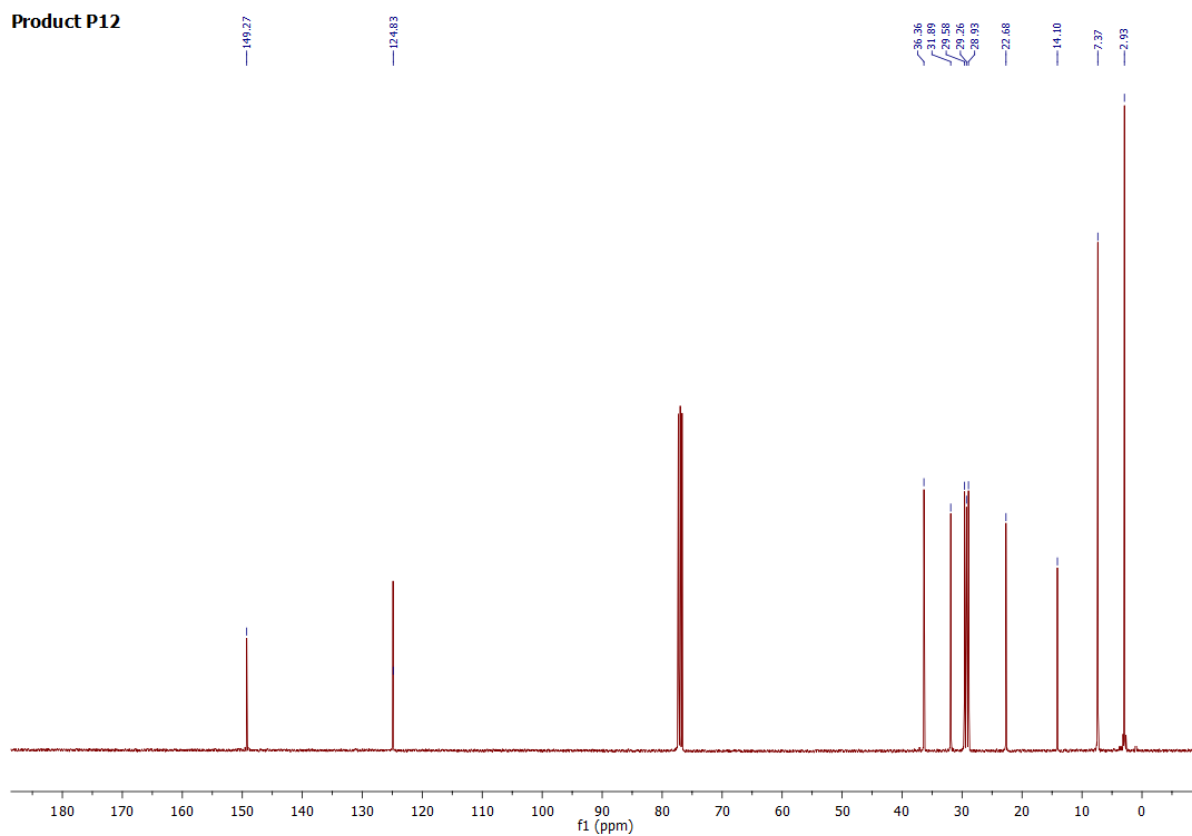

Figure S27. <sup>13</sup>C NMR (101 MHz, CDCl<sub>3</sub>) of product **P12**

Product P13

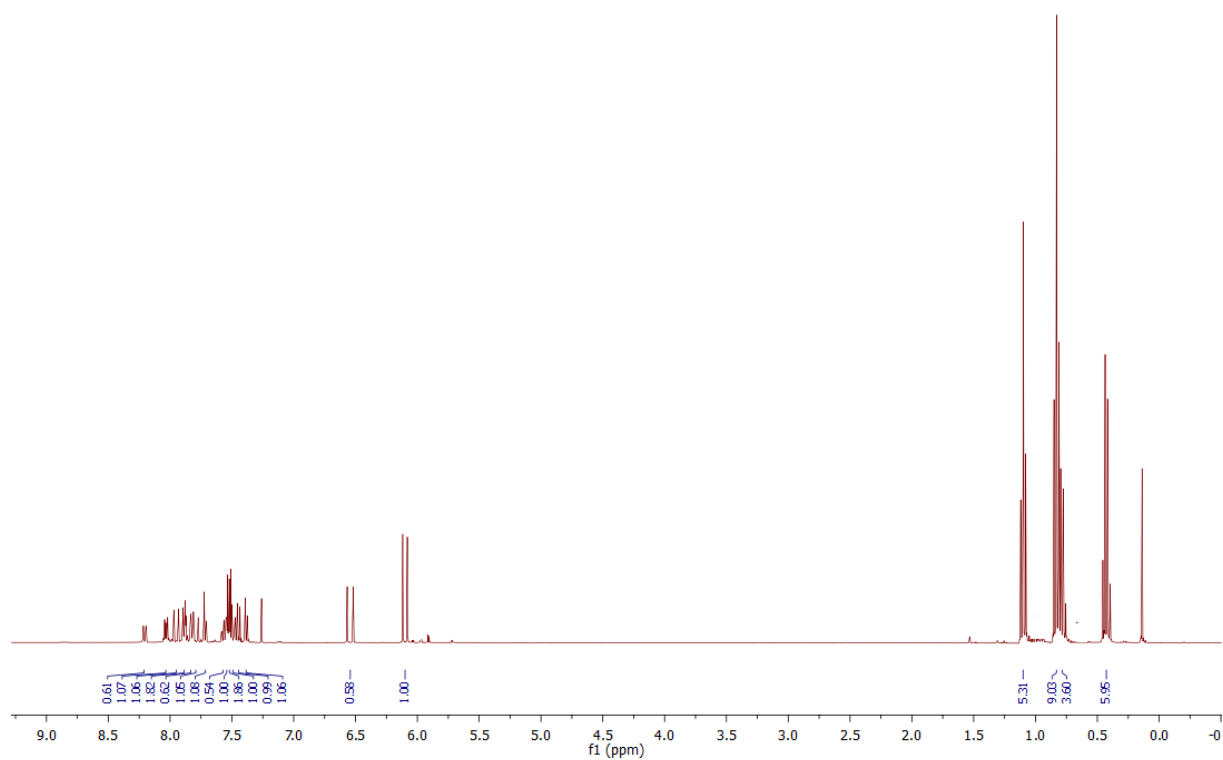

Figure S28. <sup>1</sup>H NMR (400 MHz, CDCl<sub>3</sub>) of product P13

Product P13

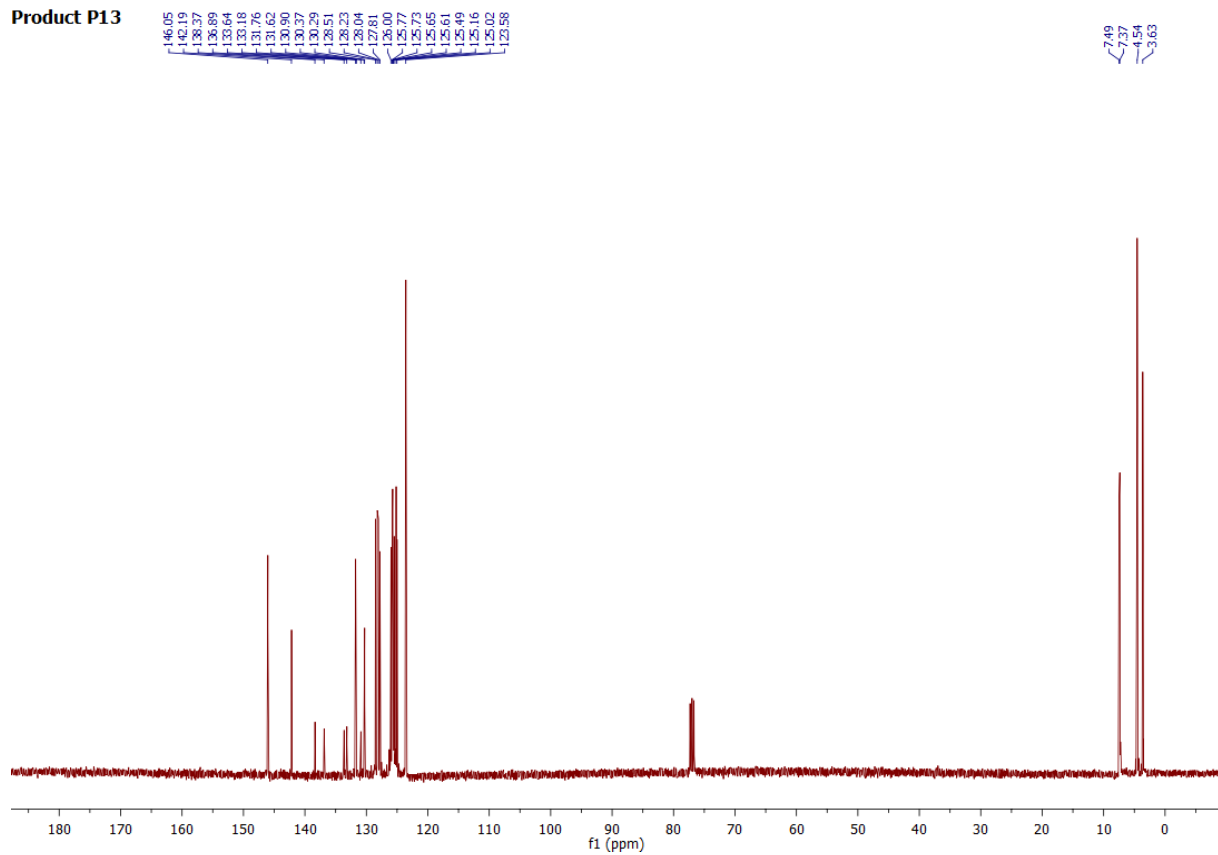

Figure S29. <sup>13</sup>C NMR (101 MHz, CDCl<sub>3</sub>) of product P13



**Product P14**

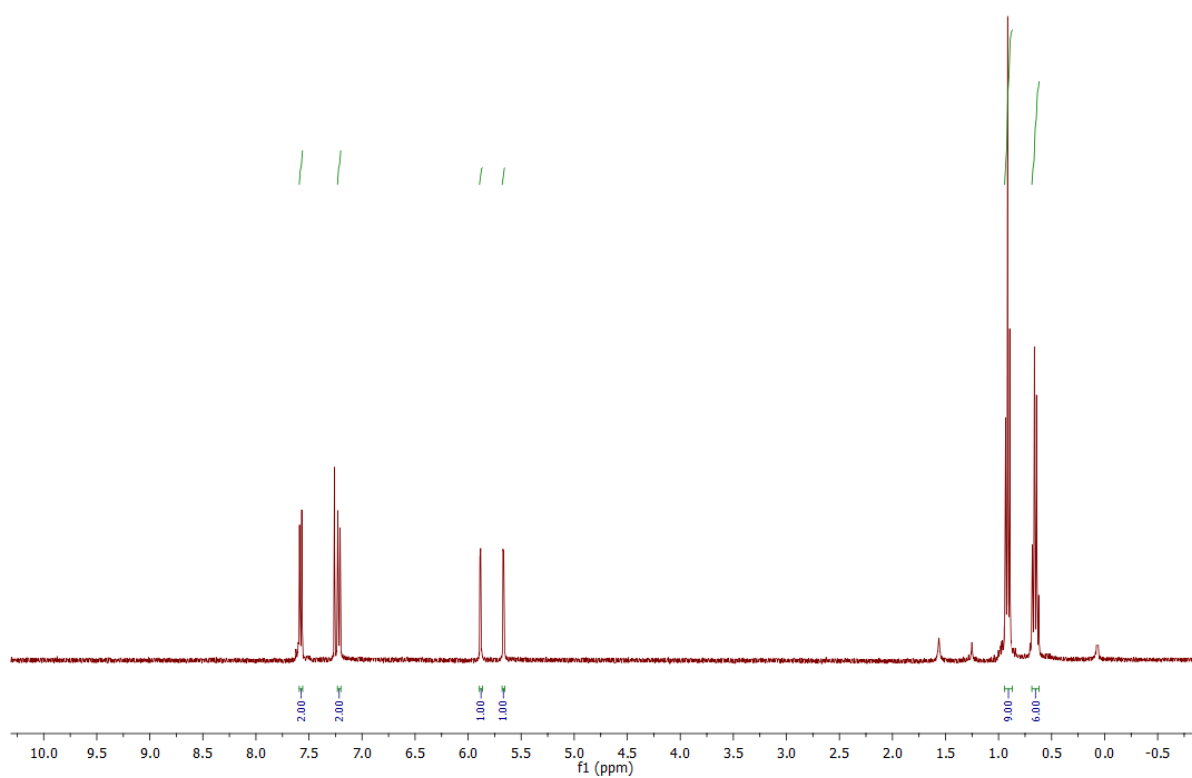

Figure S30.  $^1\text{H}$  NMR (400 MHz,  $\text{CDCl}_3$ ) of product **P14**

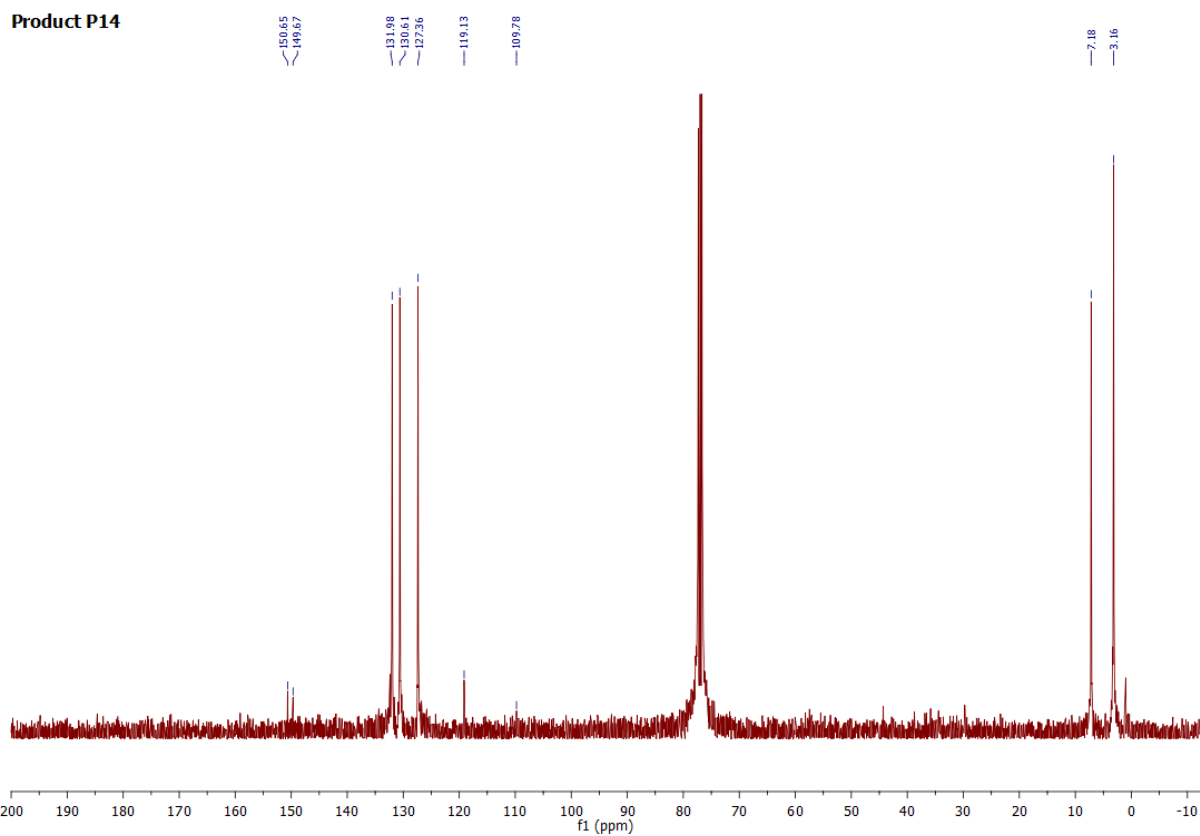

Figure S31.  $^{13}\text{C}$  NMR (101 MHz,  $\text{CDCl}_3$ ) of product **P14**

**Product P15**

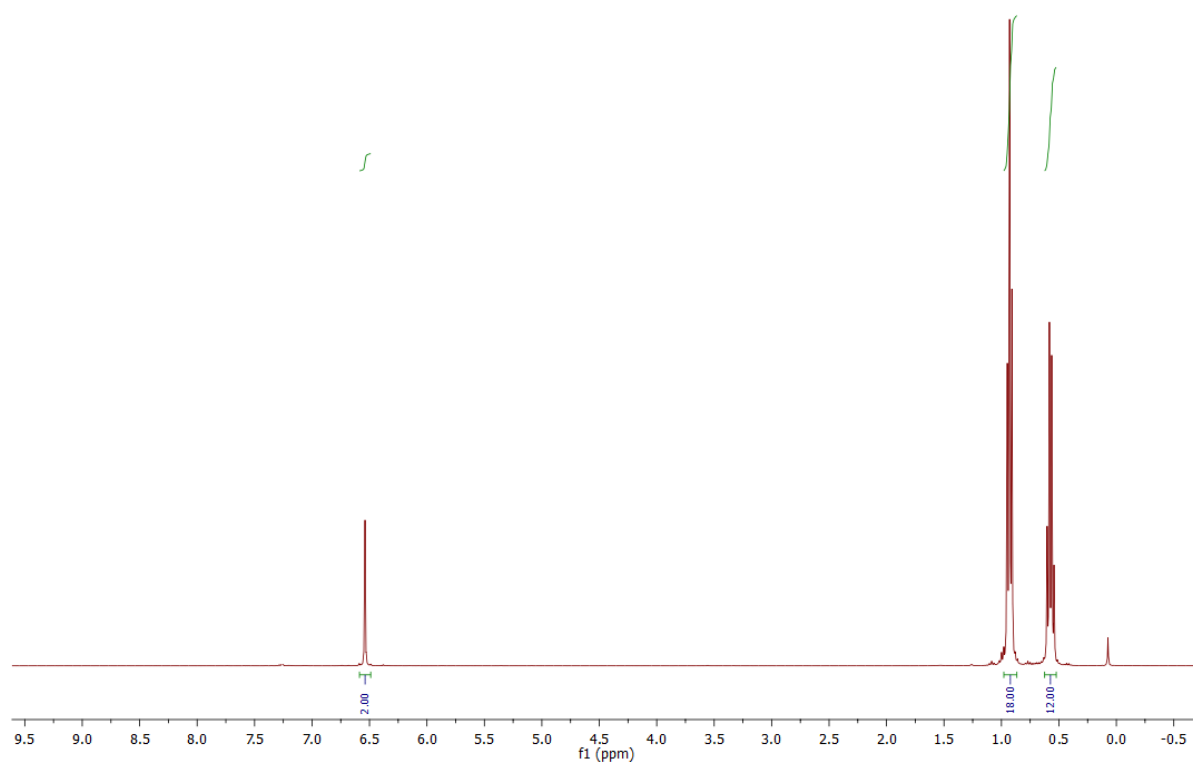

Figure S32. <sup>1</sup>H NMR (400 MHz, CDCl<sub>3</sub>) of product **P15**

**Product P15**

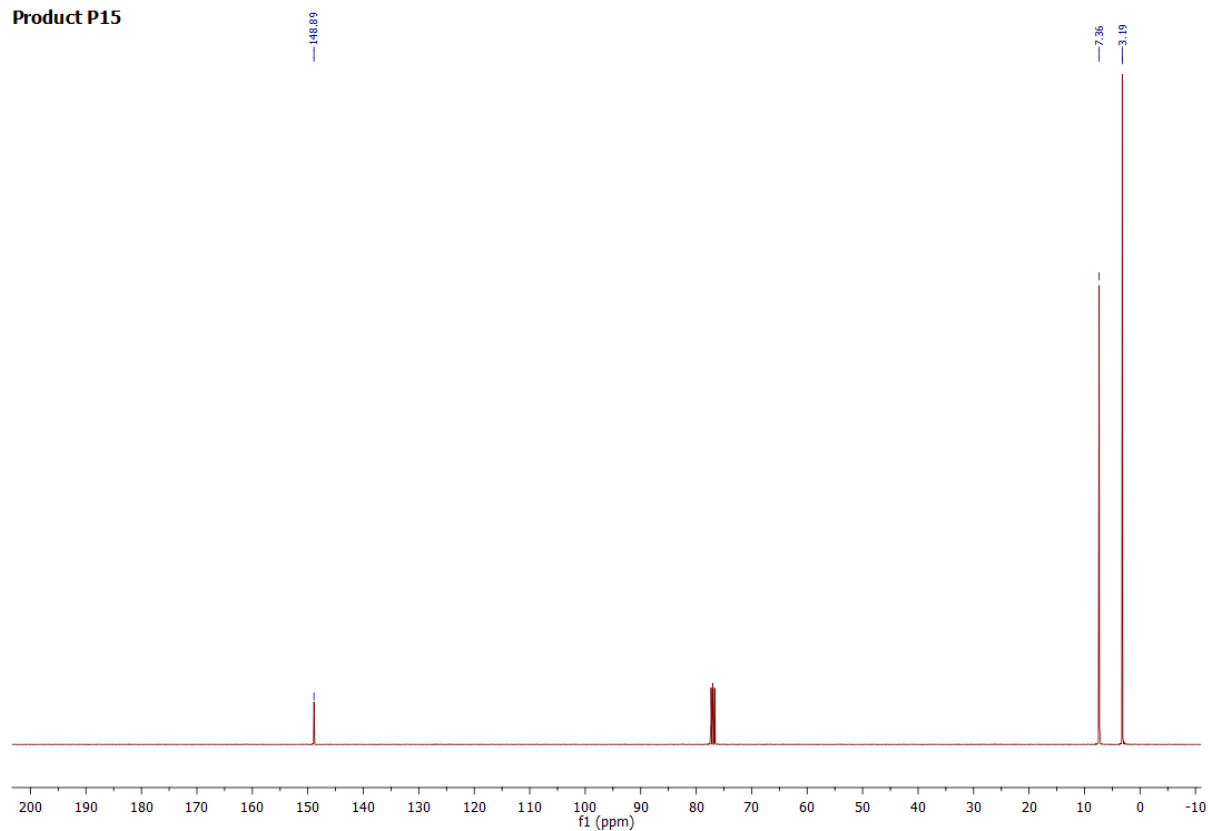

Figure S33. <sup>13</sup>C NMR (101 MHz, CDCl<sub>3</sub>) of product **P15**

**Product P16**

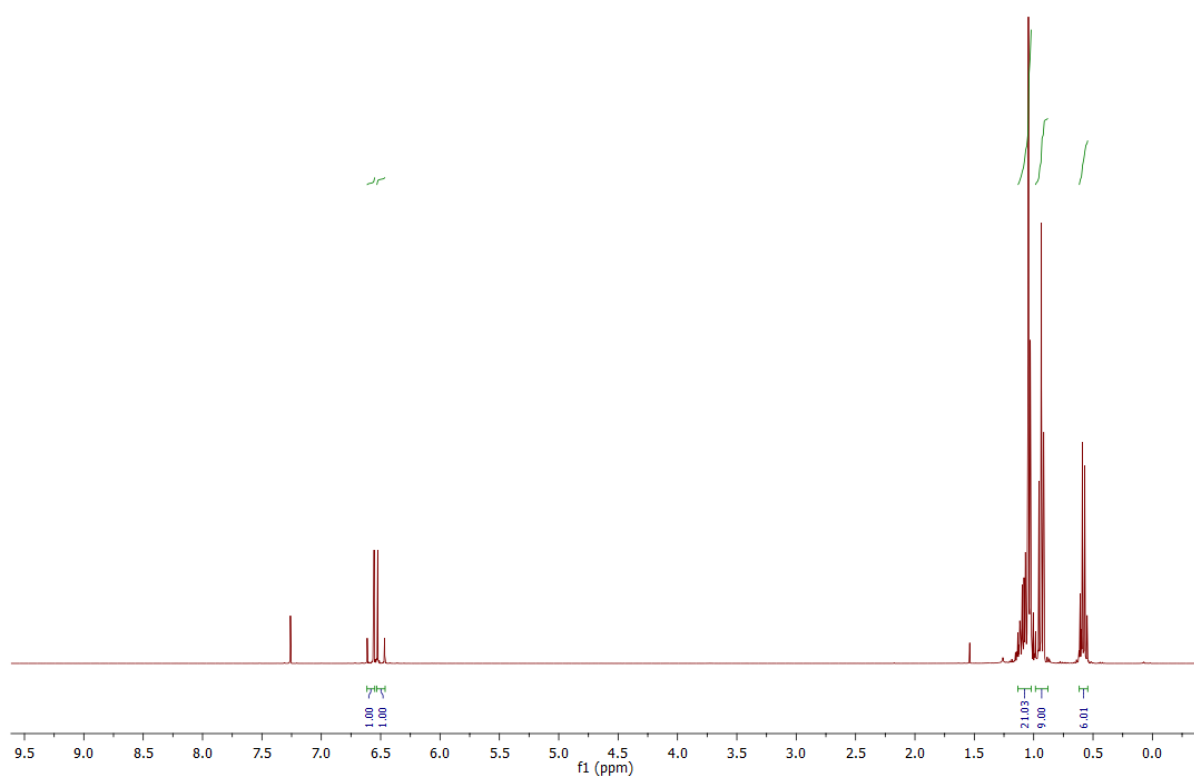

Figure S34. <sup>1</sup>H NMR (400 MHz, CDCl<sub>3</sub>) of product **P16**

**Product P16**

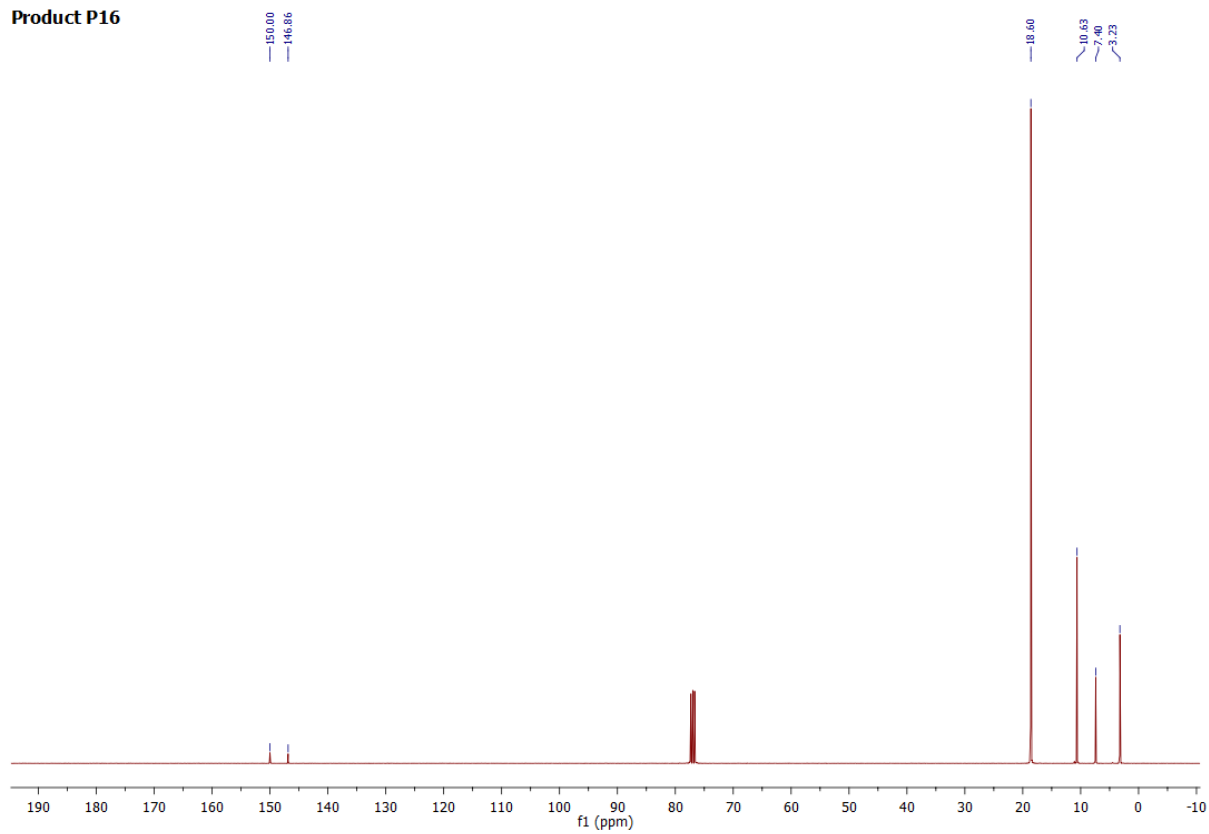

Figure S35. <sup>13</sup>C NMR (101 MHz, CDCl<sub>3</sub>) of product **P16**

**Product P17**

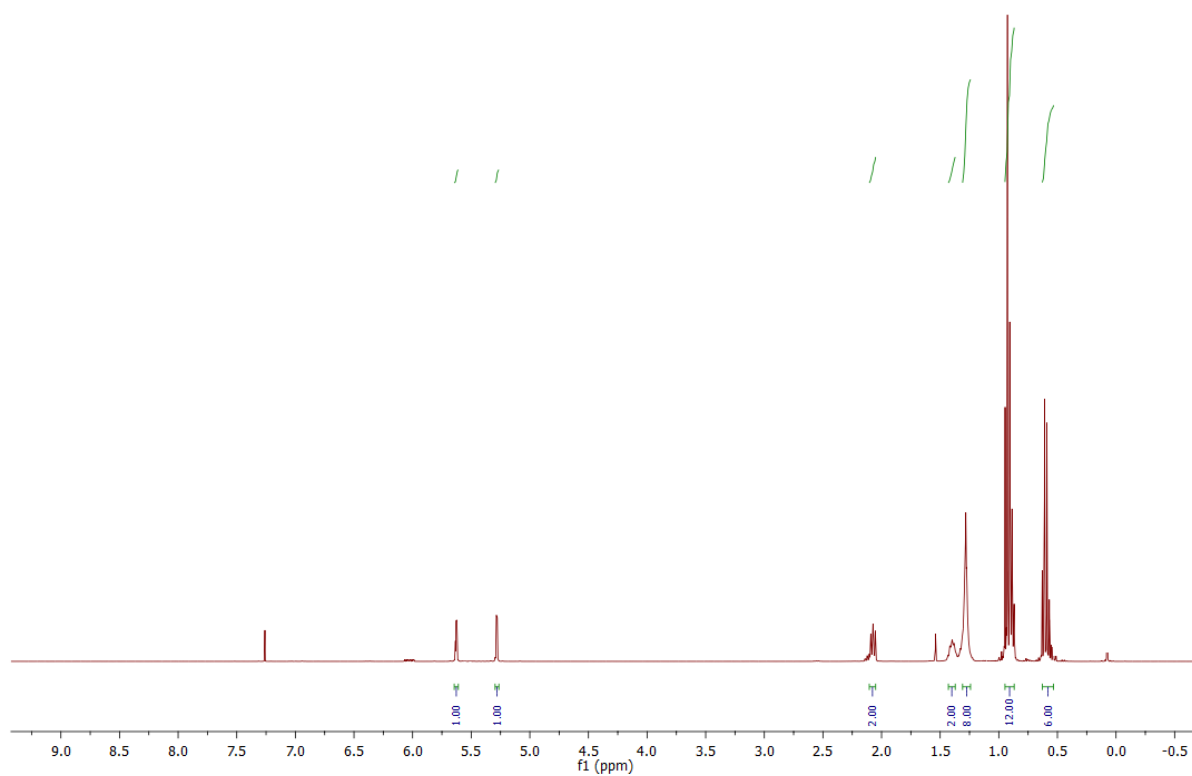

Figure S36.  $^1\text{H}$  NMR (400 MHz,  $\text{CDCl}_3$ ) of product **P17**

**Product P17**

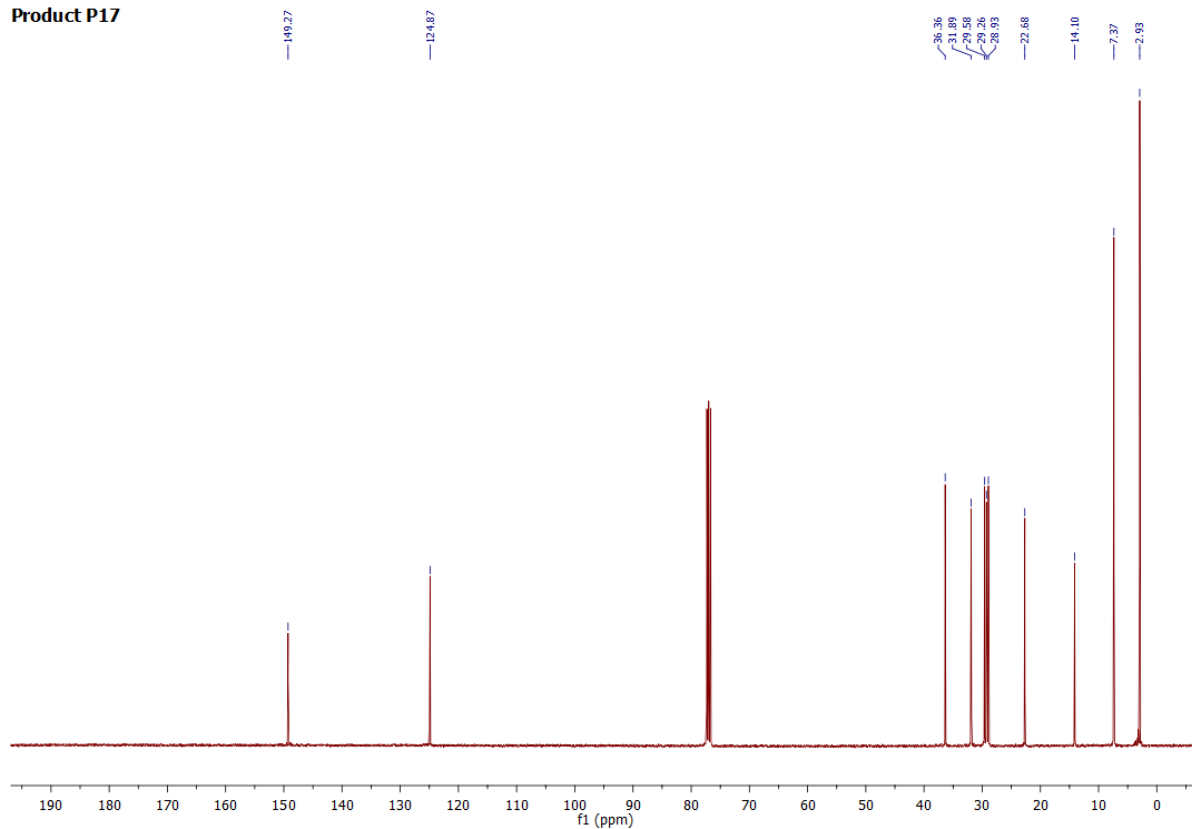

Figure S37.  $^{13}\text{C}$  NMR (101 MHz,  $\text{CDCl}_3$ ) of product **P17**

Product P18

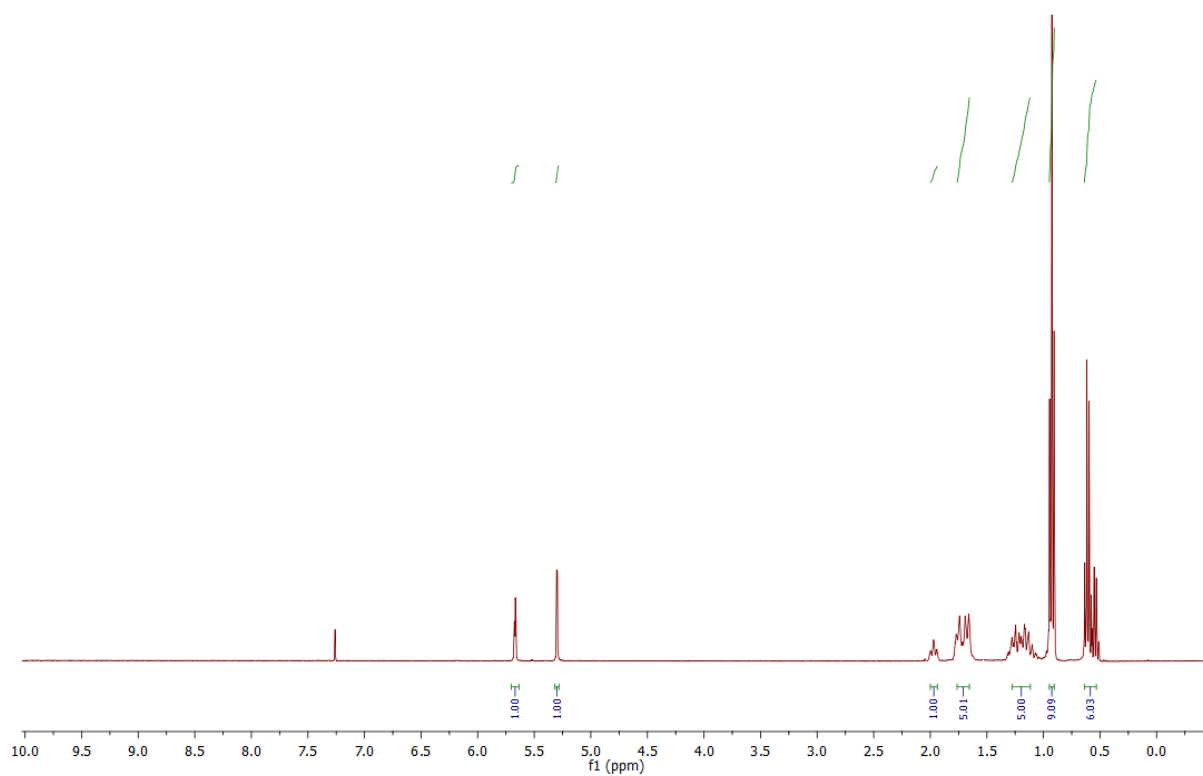

Figure S38. <sup>1</sup>H NMR (400 MHz, CDCl<sub>3</sub>) of product P18

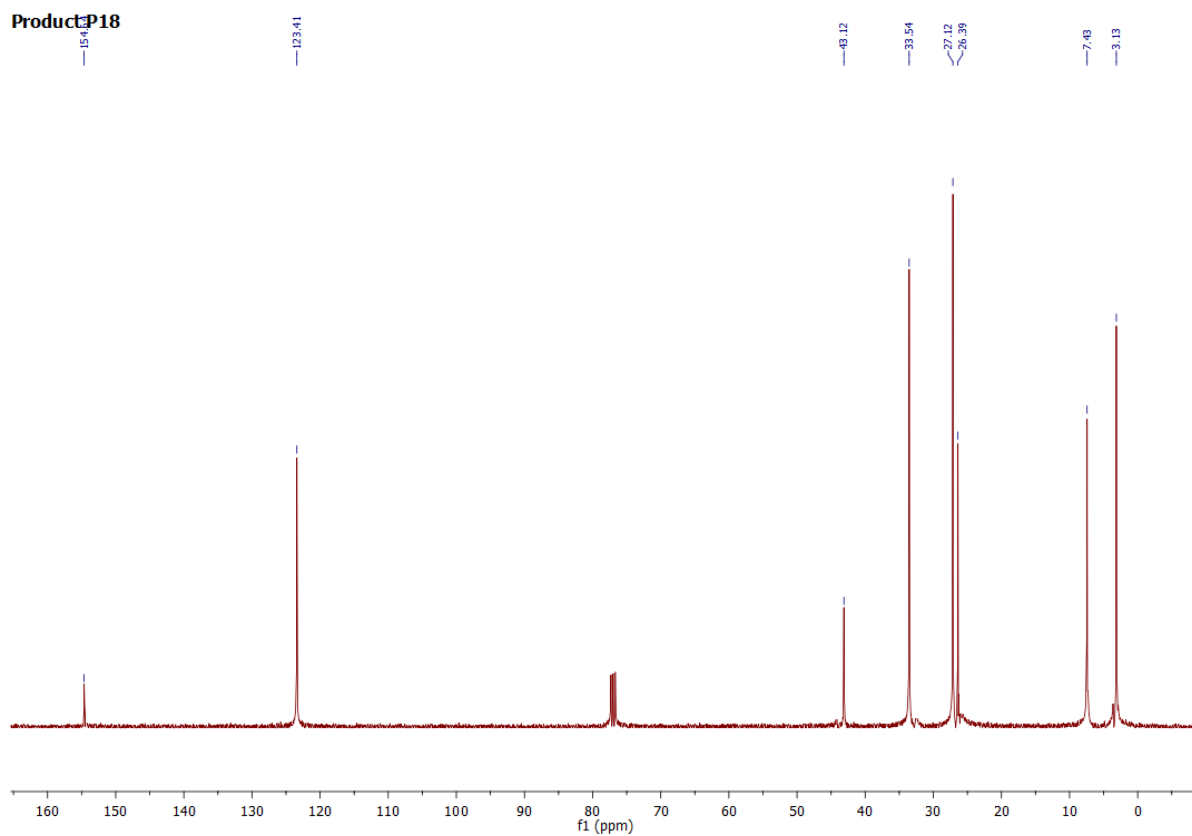

Figure S39. <sup>13</sup>C NMR (101 MHz, CDCl<sub>3</sub>) of product P18

**Product P19**

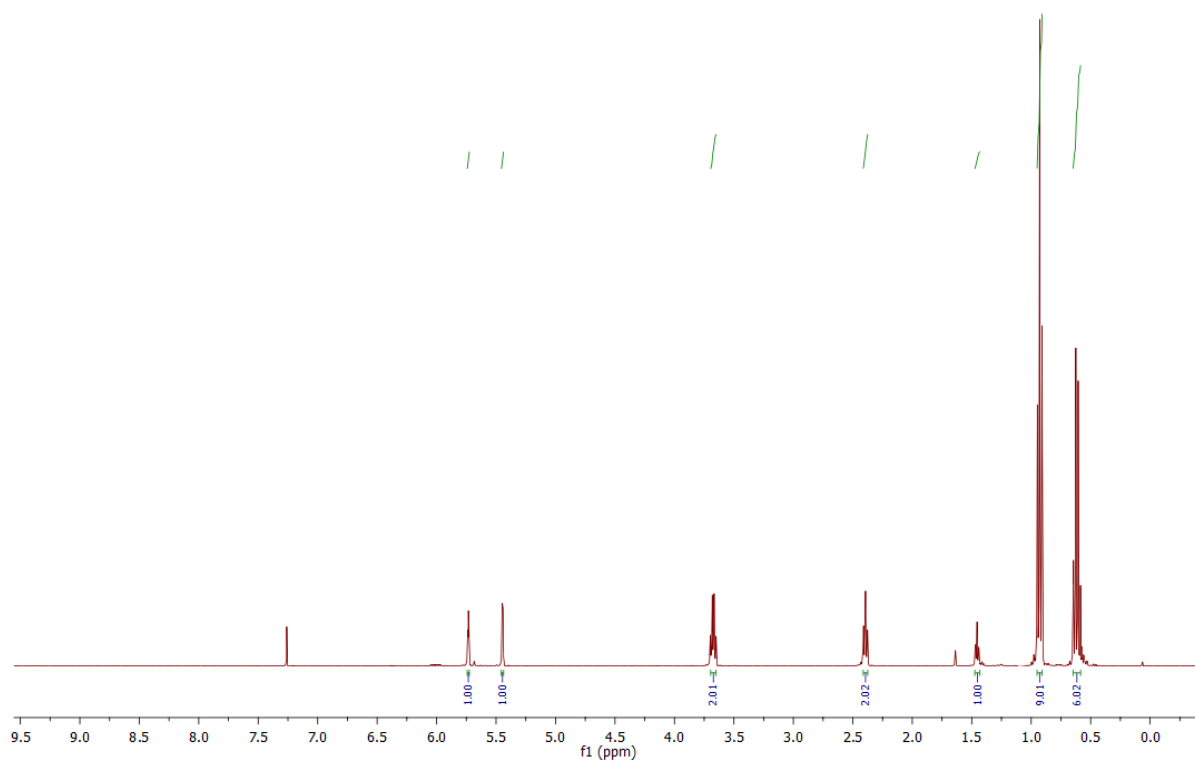

Figure S40. <sup>1</sup>H NMR (400 MHz, CDCl<sub>3</sub>) of product **P19**

**Product P19**

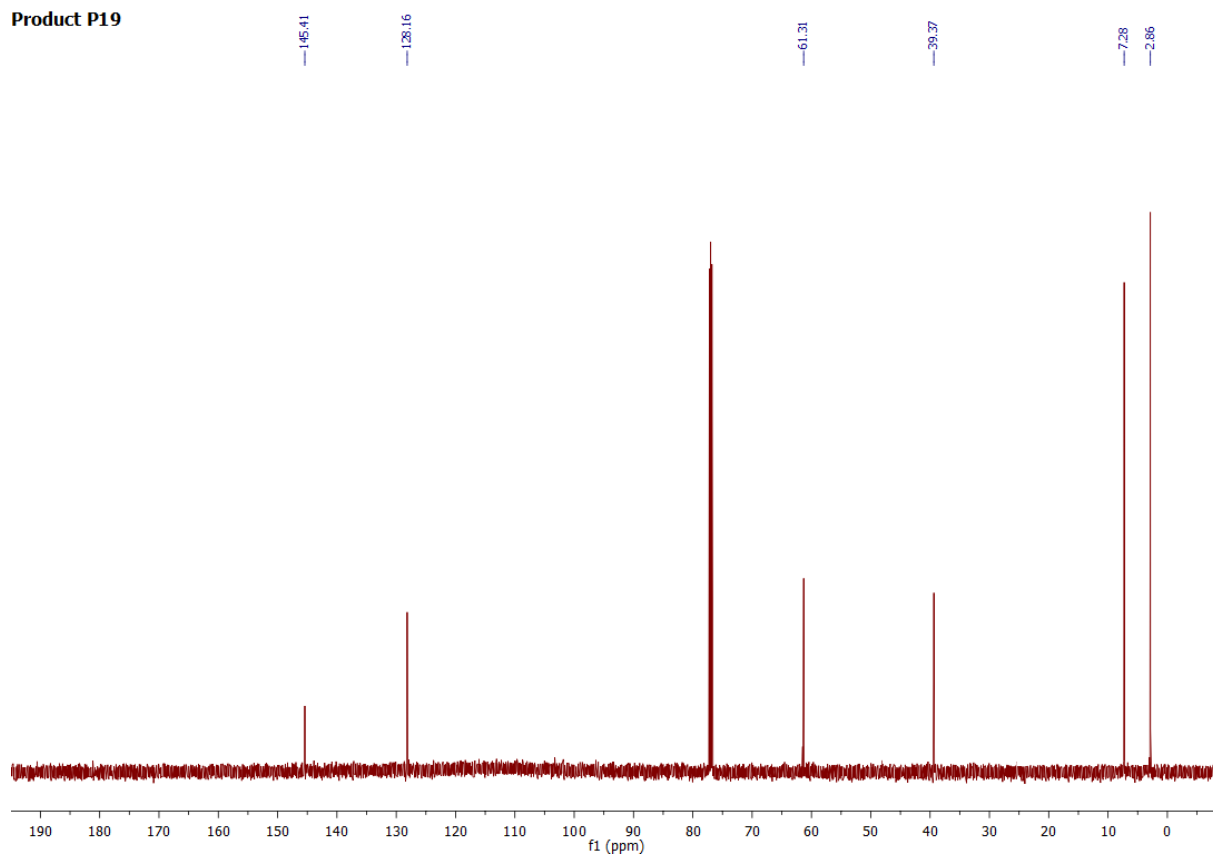

Figure S41. <sup>13</sup>C NMR (101 MHz, CDCl<sub>3</sub>) of product **P19**

**Product P20**

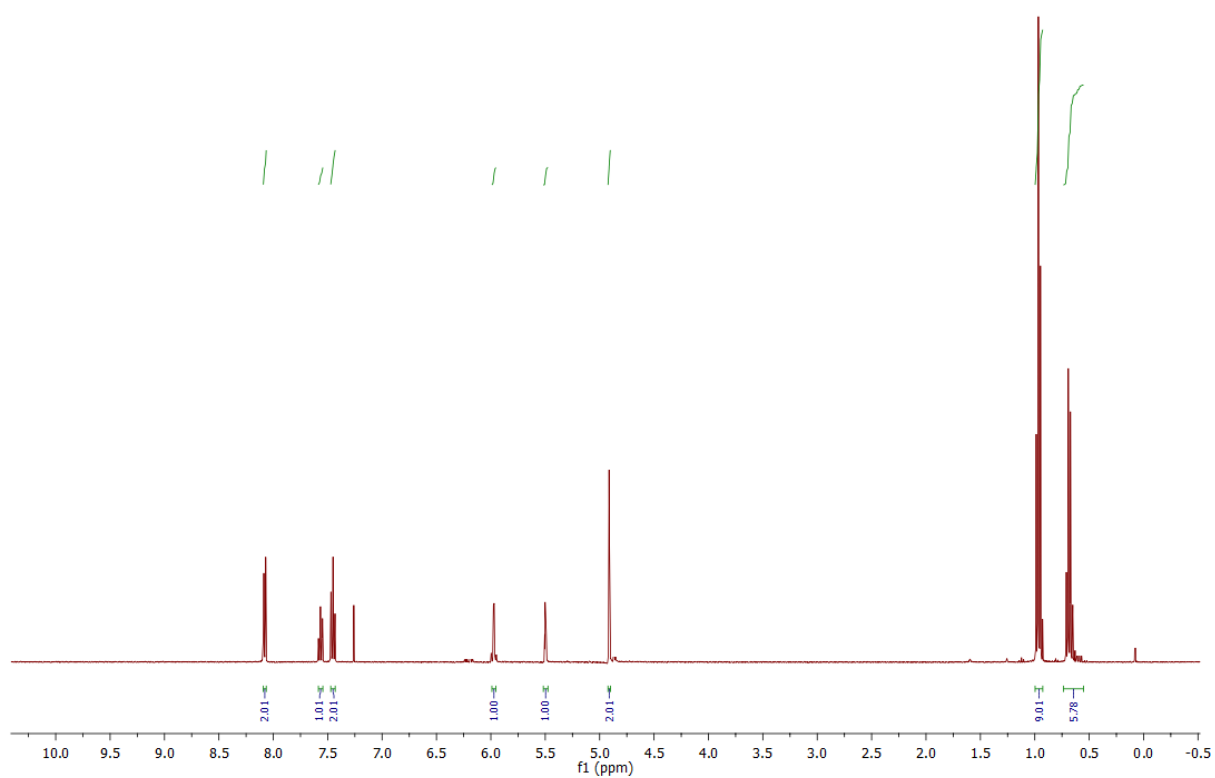

Figure S42. <sup>1</sup>H NMR (400 MHz, CDCl<sub>3</sub>) of product **P20**

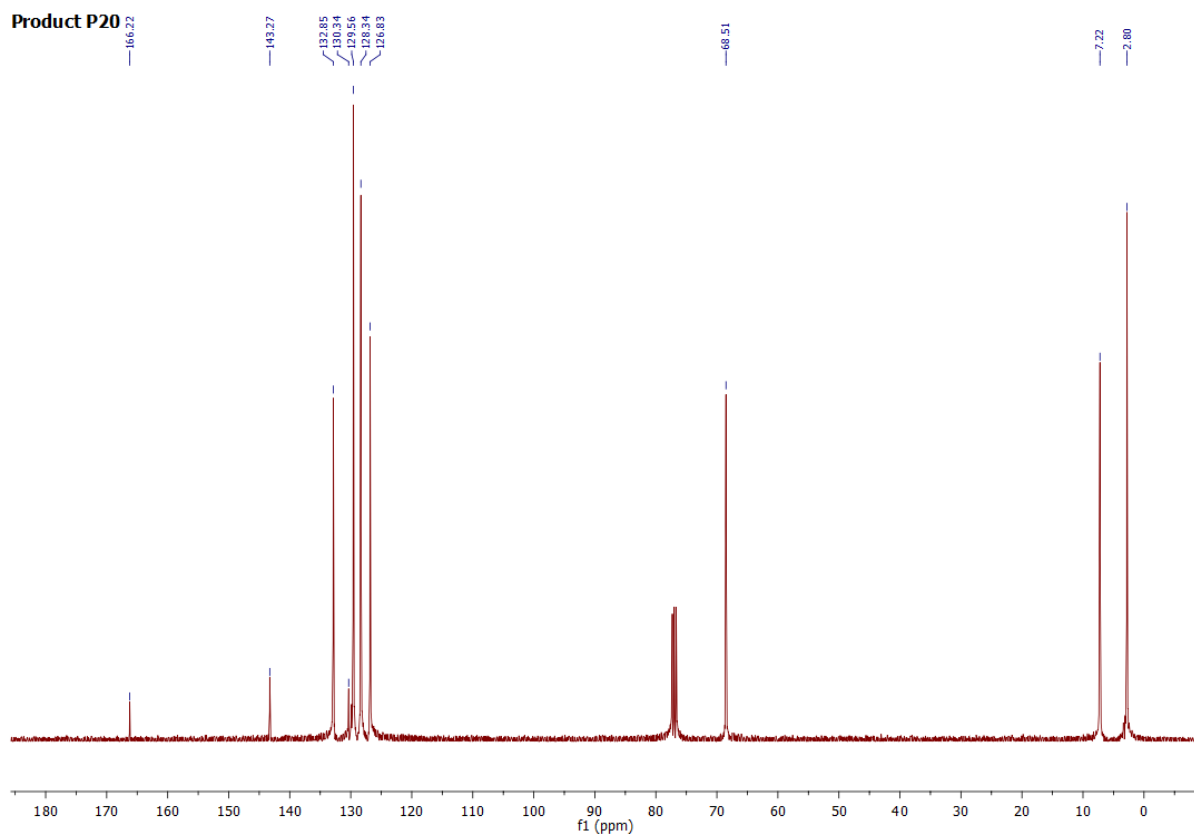

Figure S43. <sup>13</sup>C NMR (101 MHz, CDCl<sub>3</sub>) of product **P20**

Product P21

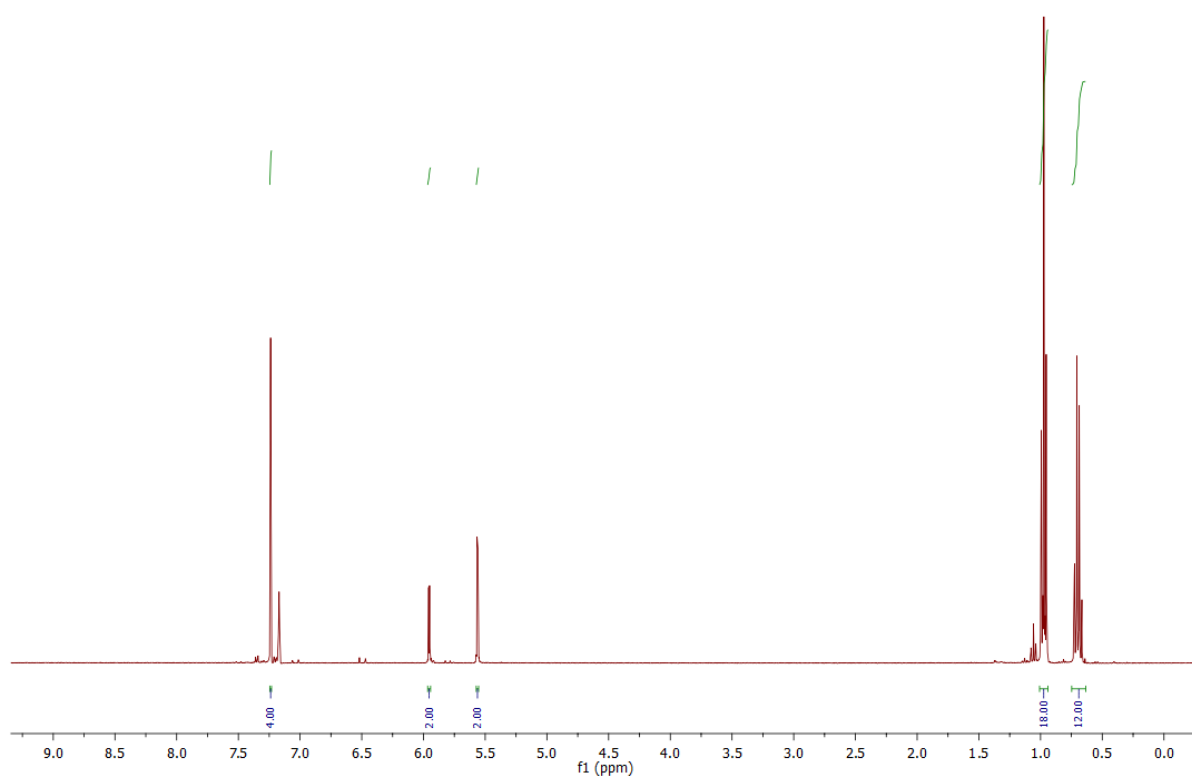

Figure S44. <sup>1</sup>H NMR (400 MHz, C<sub>6</sub>D<sub>6</sub>) of product **P21**

Product P21

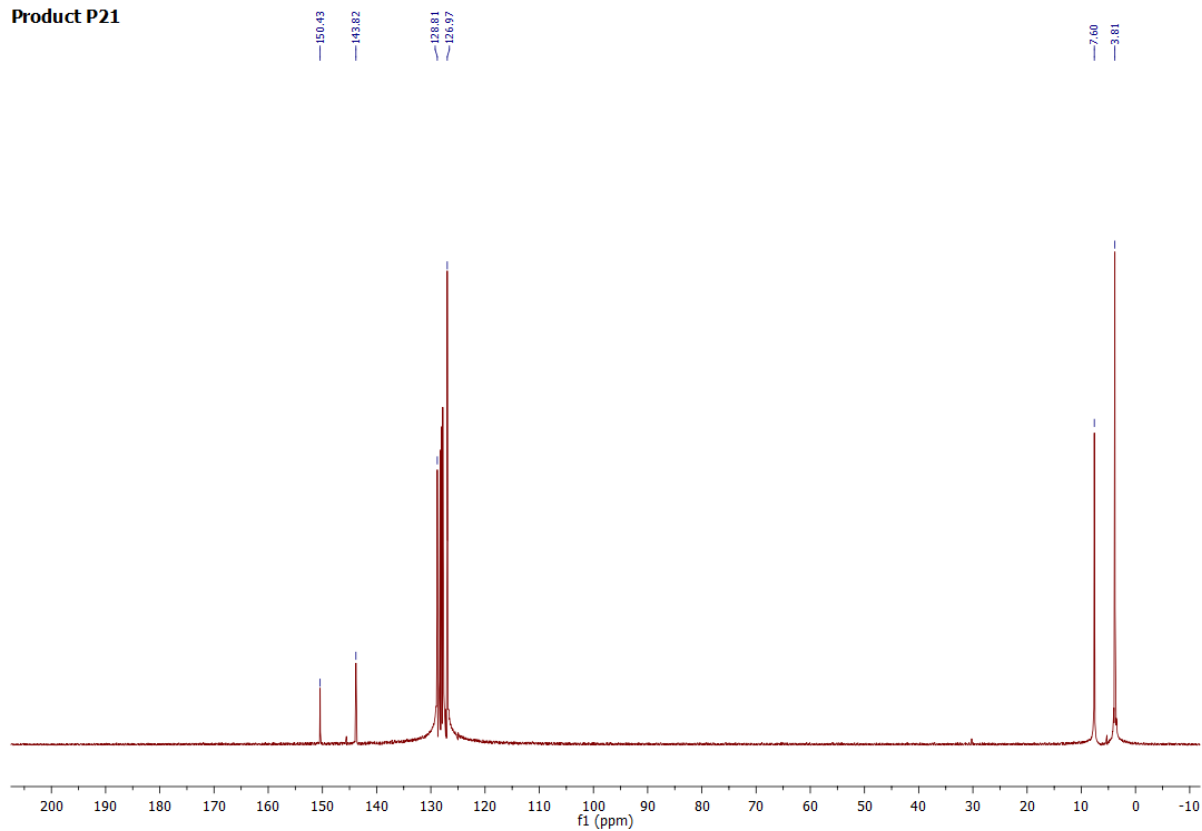

Figure S45. <sup>13</sup>C NMR (101 MHz, C<sub>6</sub>D<sub>6</sub>) of product **P21**



**Product P22**

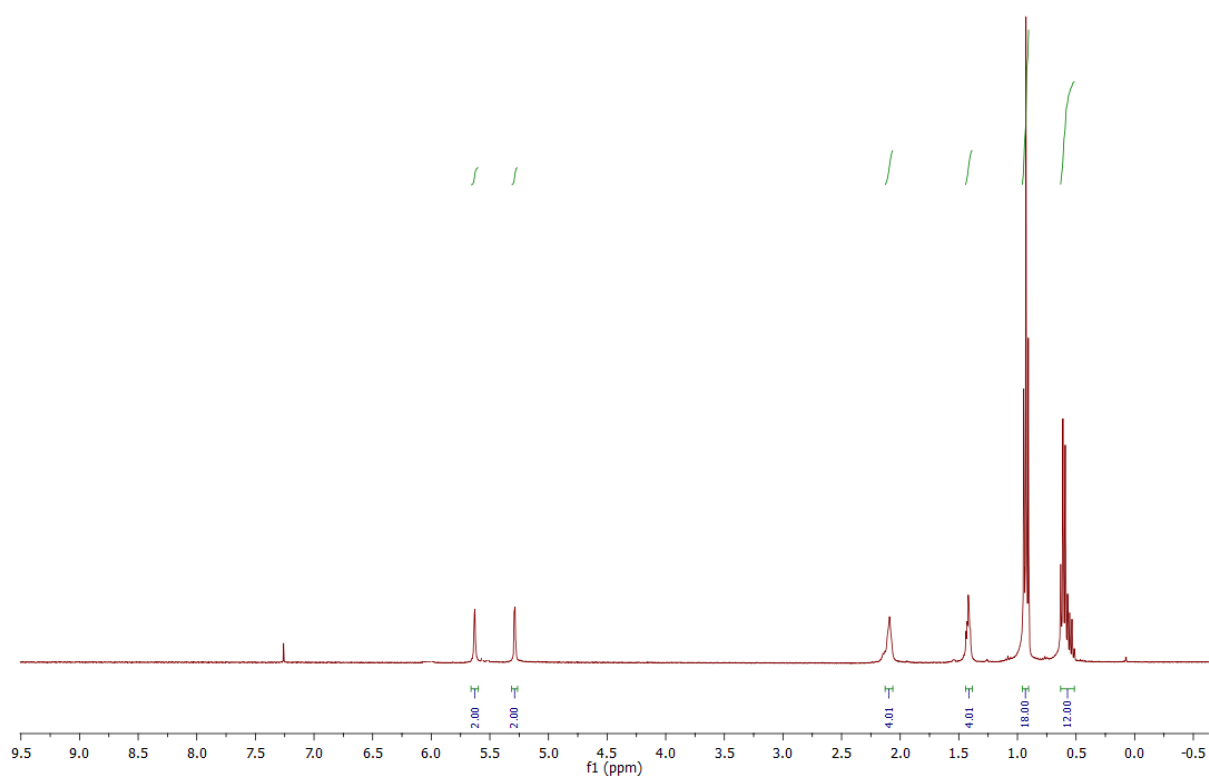

Figure S46. <sup>1</sup>H NMR (400 MHz, CDCl<sub>3</sub>) of product **P22**

**Product P22**

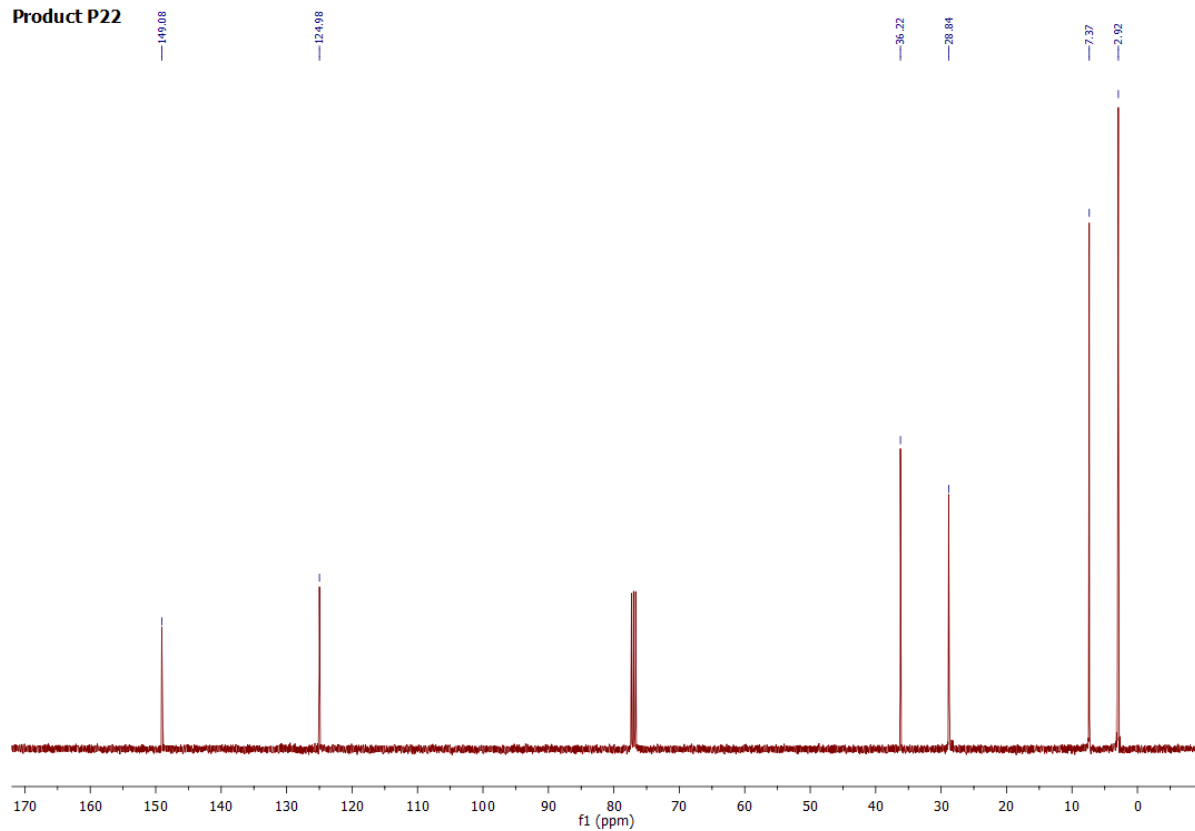

Figure S47. <sup>13</sup>C NMR (101 MHz, CDCl<sub>3</sub>) of product **P22**

Product P23

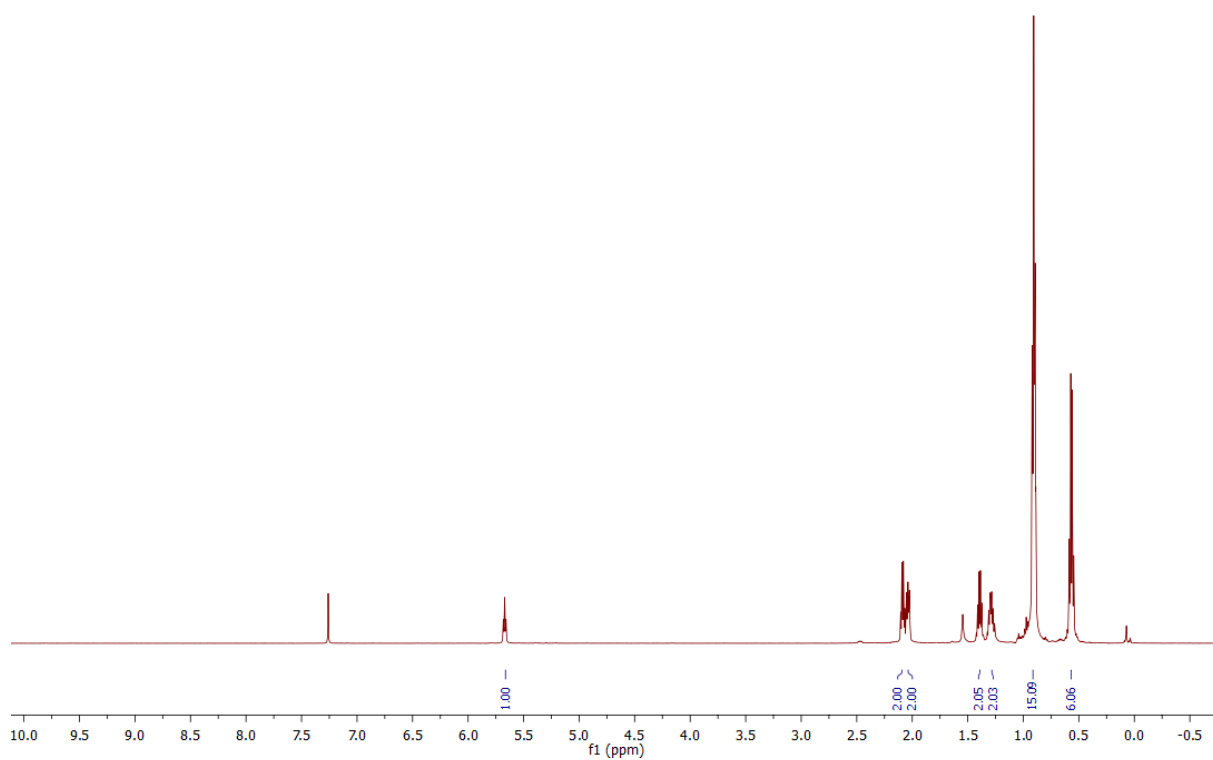

Figure S48. <sup>1</sup>H NMR (400 MHz, CDCl<sub>3</sub>) of product P23

Product P23

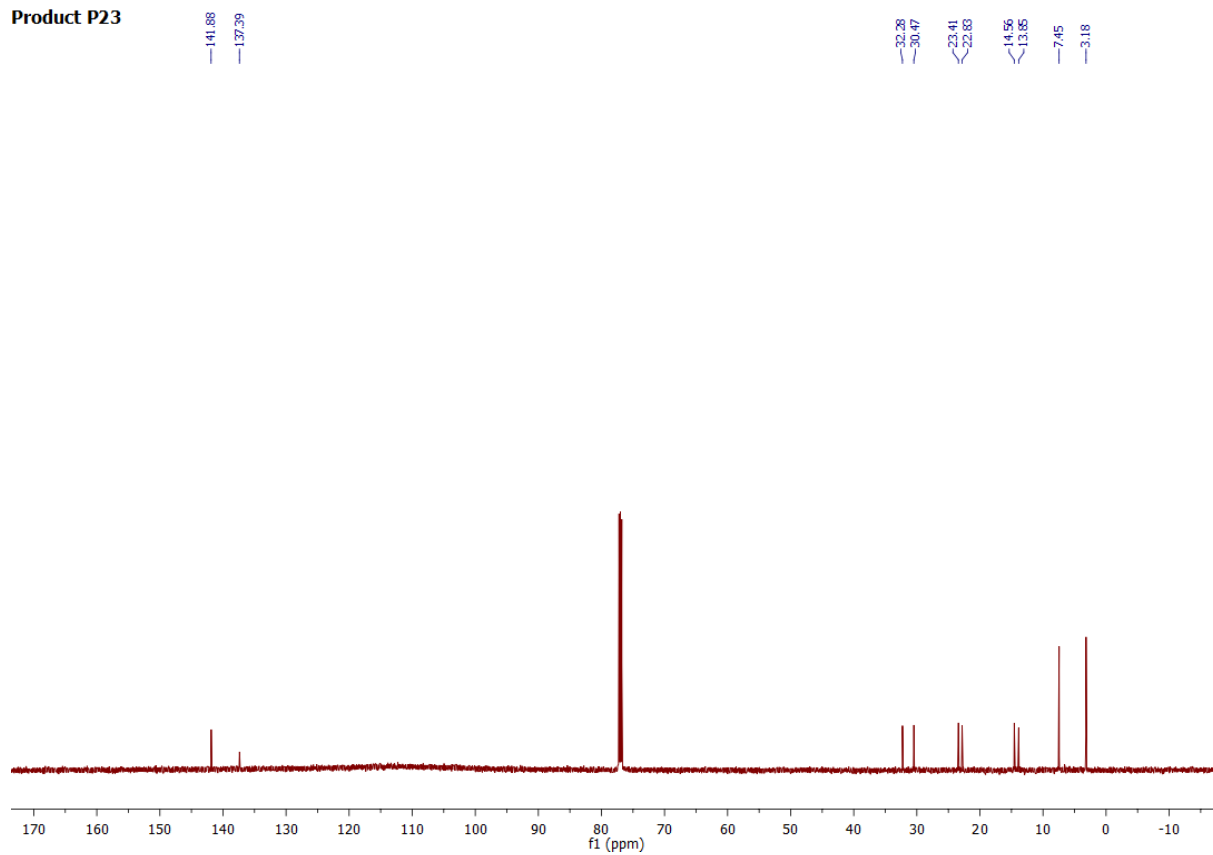

Figure S49. <sup>13</sup>C NMR (101 MHz, CDCl<sub>3</sub>) of product P23

Product P24

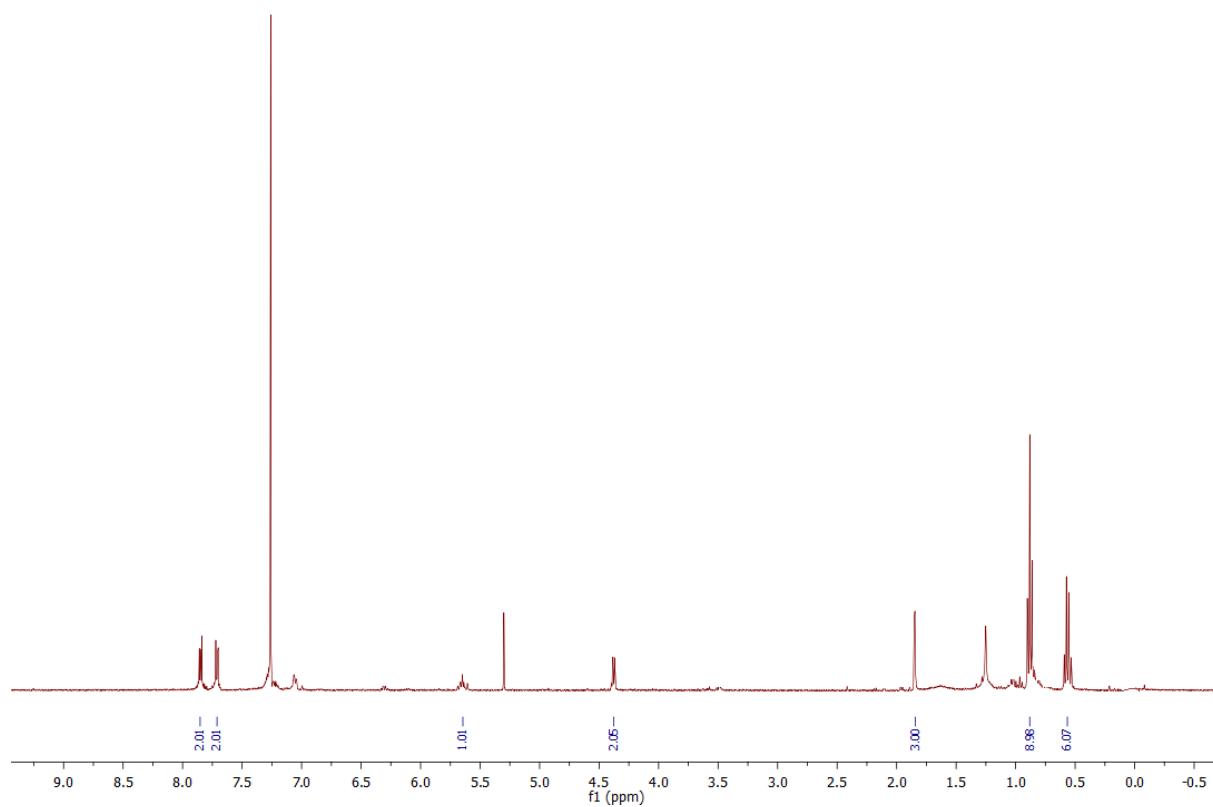

Figure S50. <sup>1</sup>H NMR (400 MHz, CDCl<sub>3</sub>) of product P24

Product P24

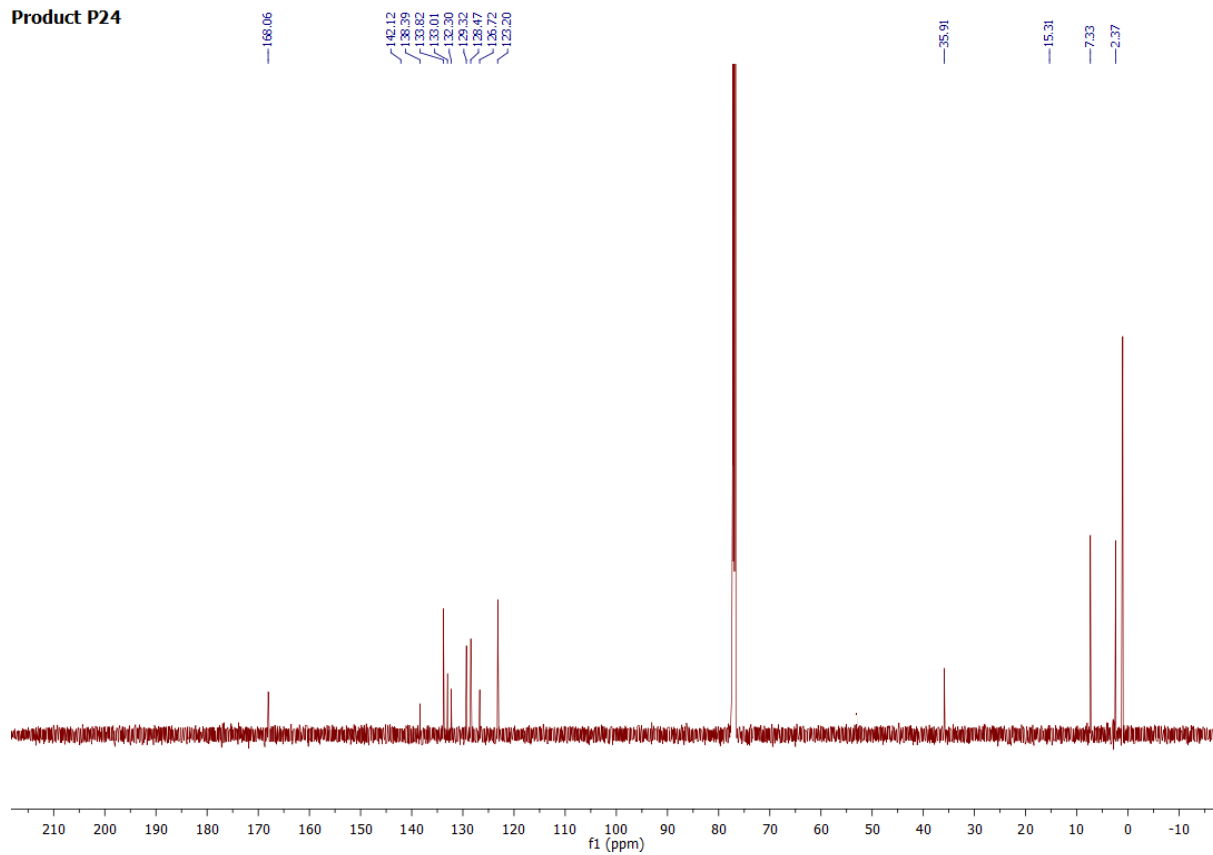

Figure S51. <sup>13</sup>C NMR (101 MHz, CDCl<sub>3</sub>) of product P24

**Product P26**

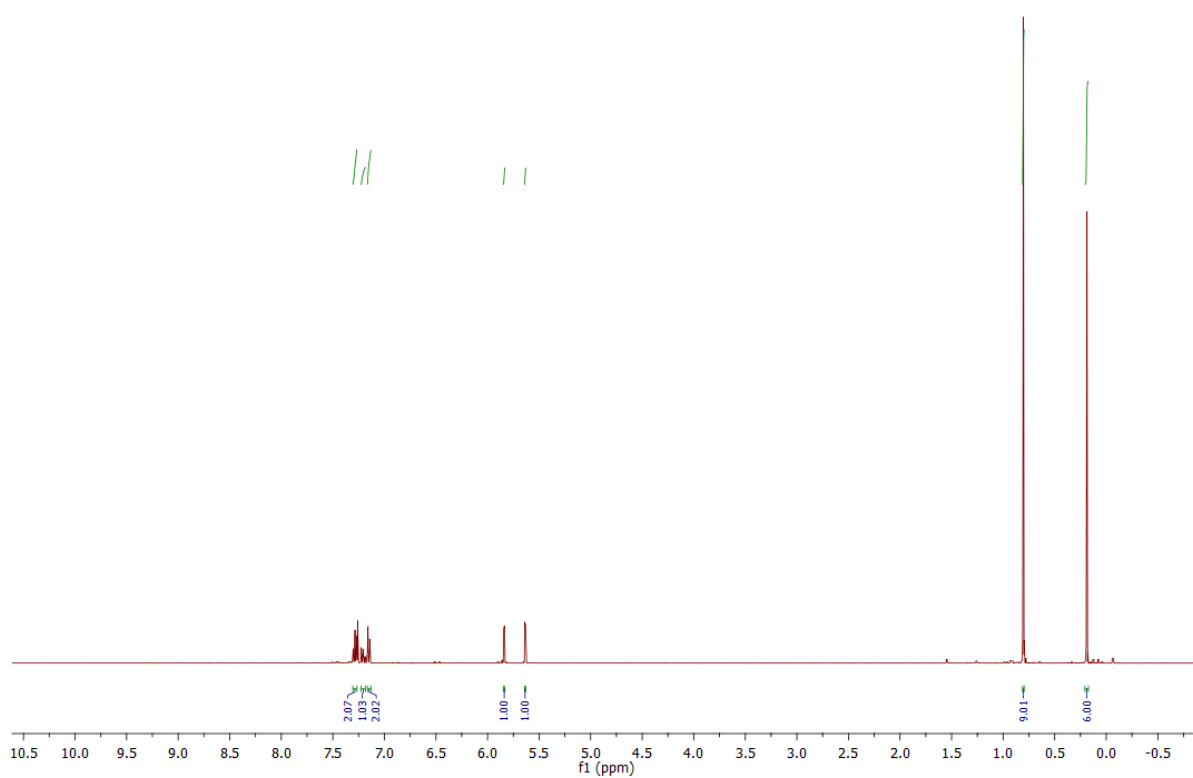

Figure S52.  $^1\text{H}$  NMR (400 MHz,  $\text{CDCl}_3$ ) of product **P26**

**Product P26**

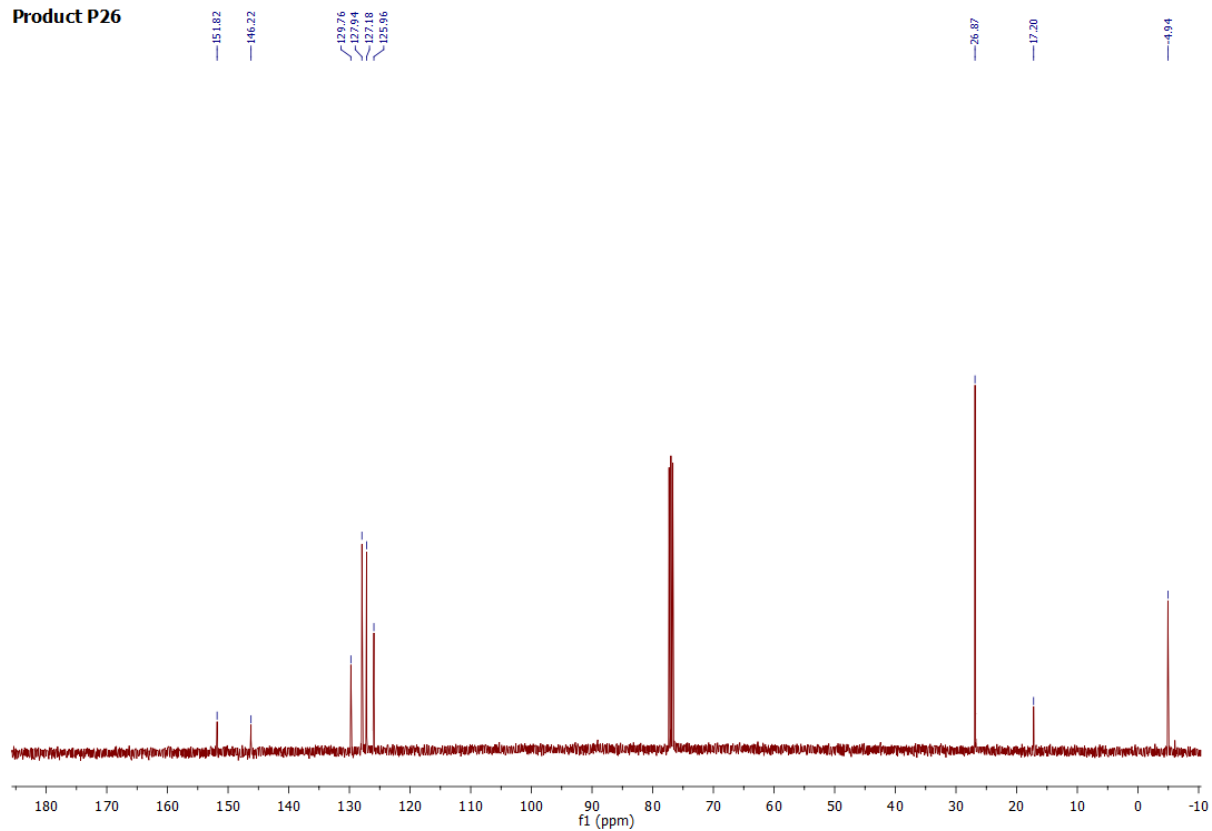

Figure S53.  $^{13}\text{C}$  NMR (101 MHz,  $\text{CDCl}_3$ ) of product **P26**

**Product P27**

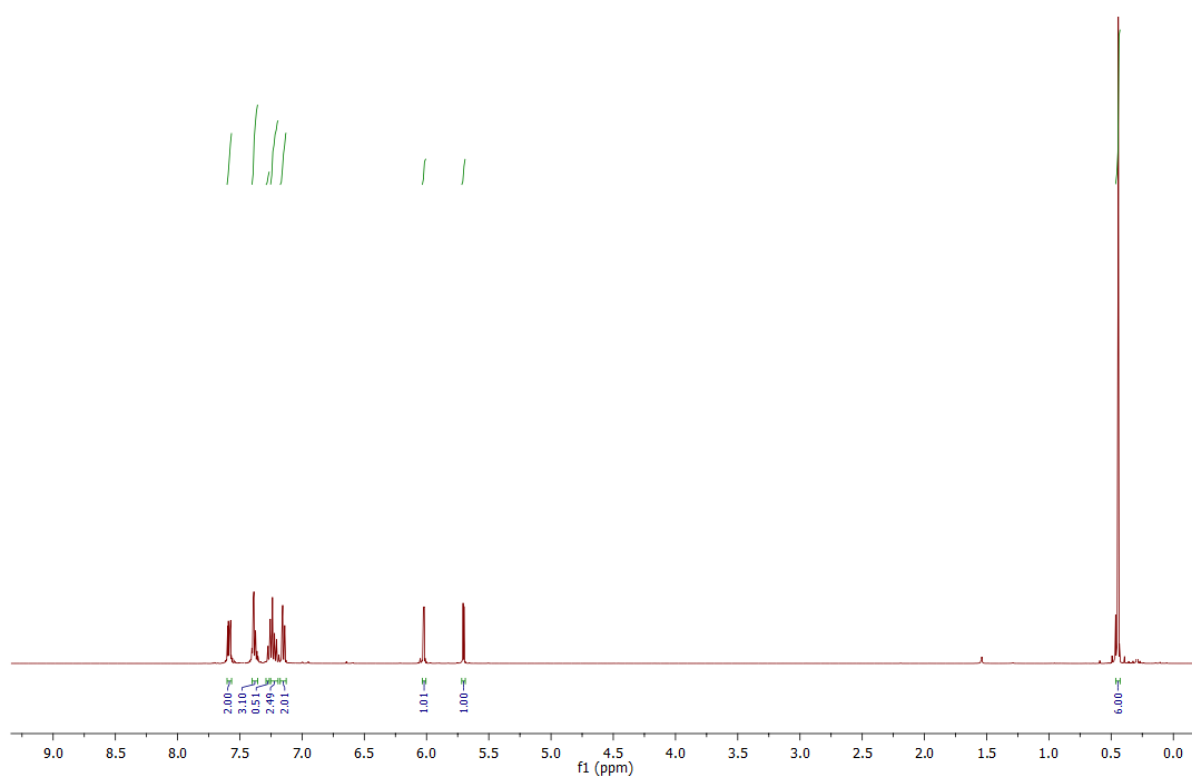

Figure S54. <sup>1</sup>H NMR (400 MHz, CDCl<sub>3</sub>) of product **P27**

**Product P27**

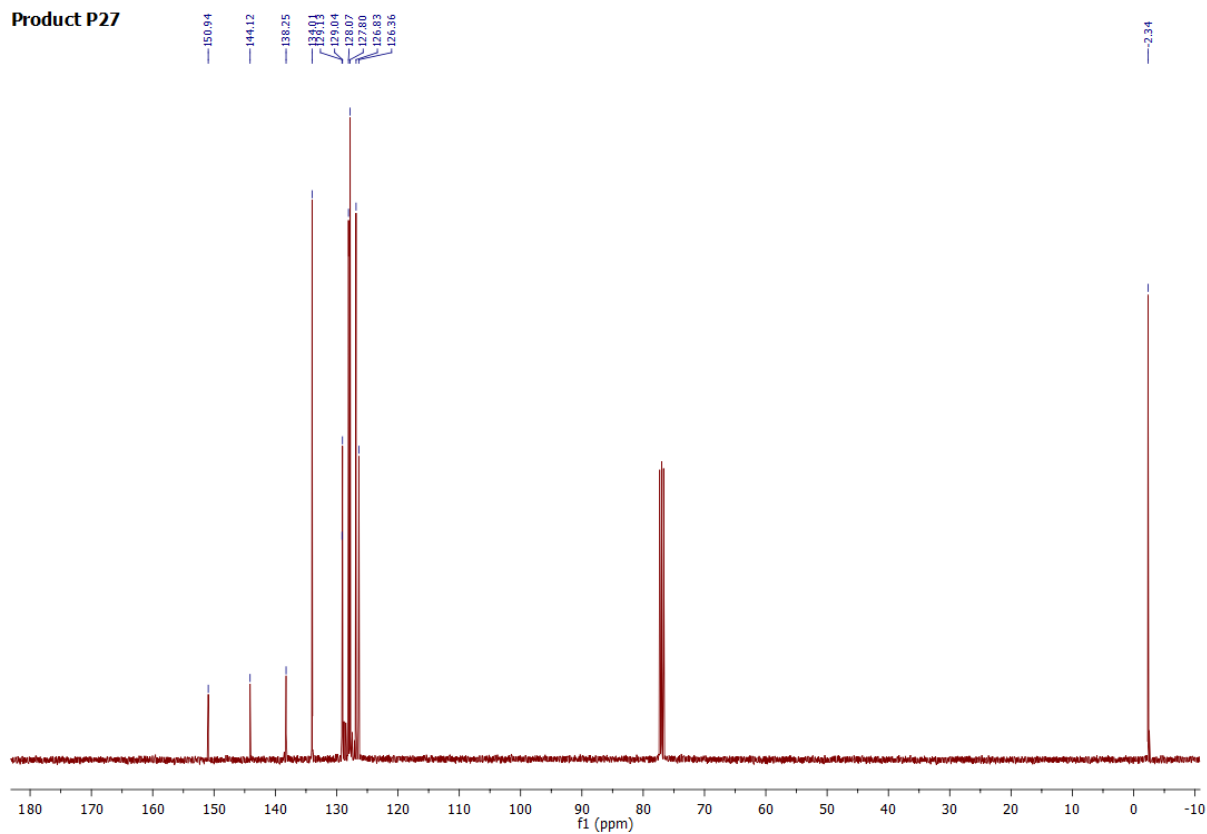

Figure S55. <sup>13</sup>C NMR (101 MHz, CDCl<sub>3</sub>) of product **P27**

**Product P28**

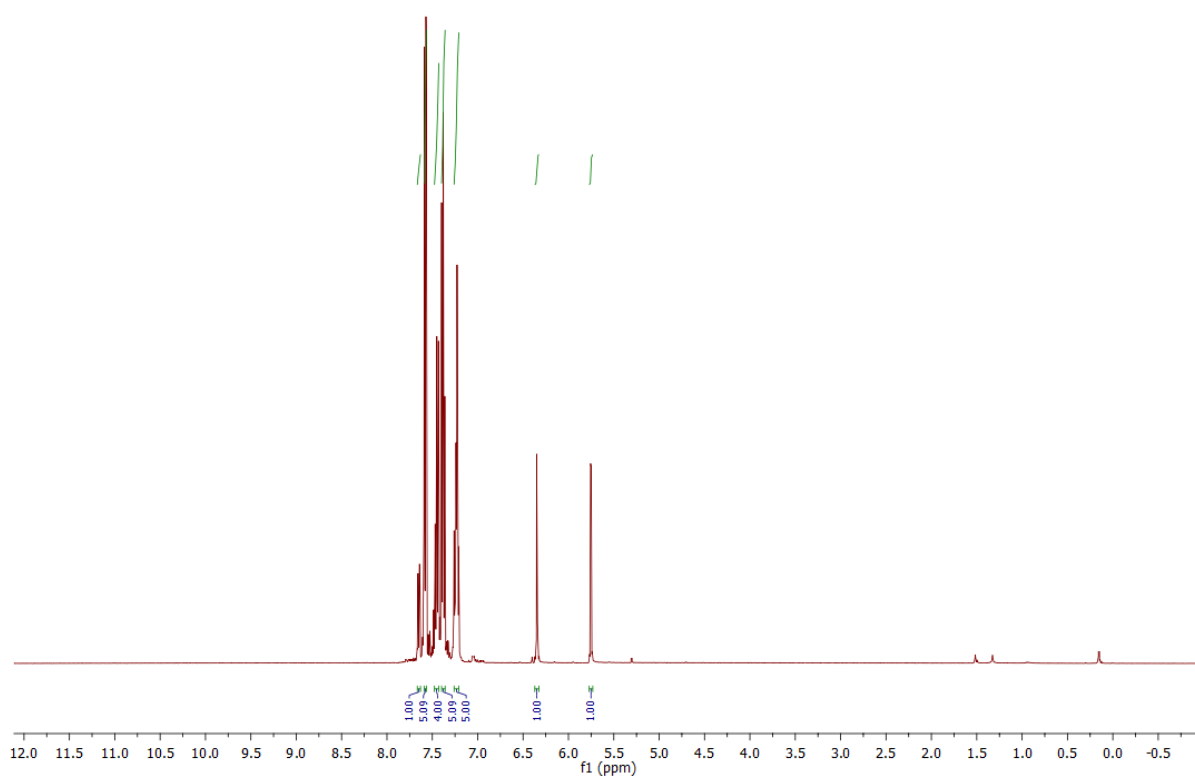

Figure S56. <sup>1</sup>H NMR (400 MHz, CDCl<sub>3</sub>) of product **P28**

**Product P28**

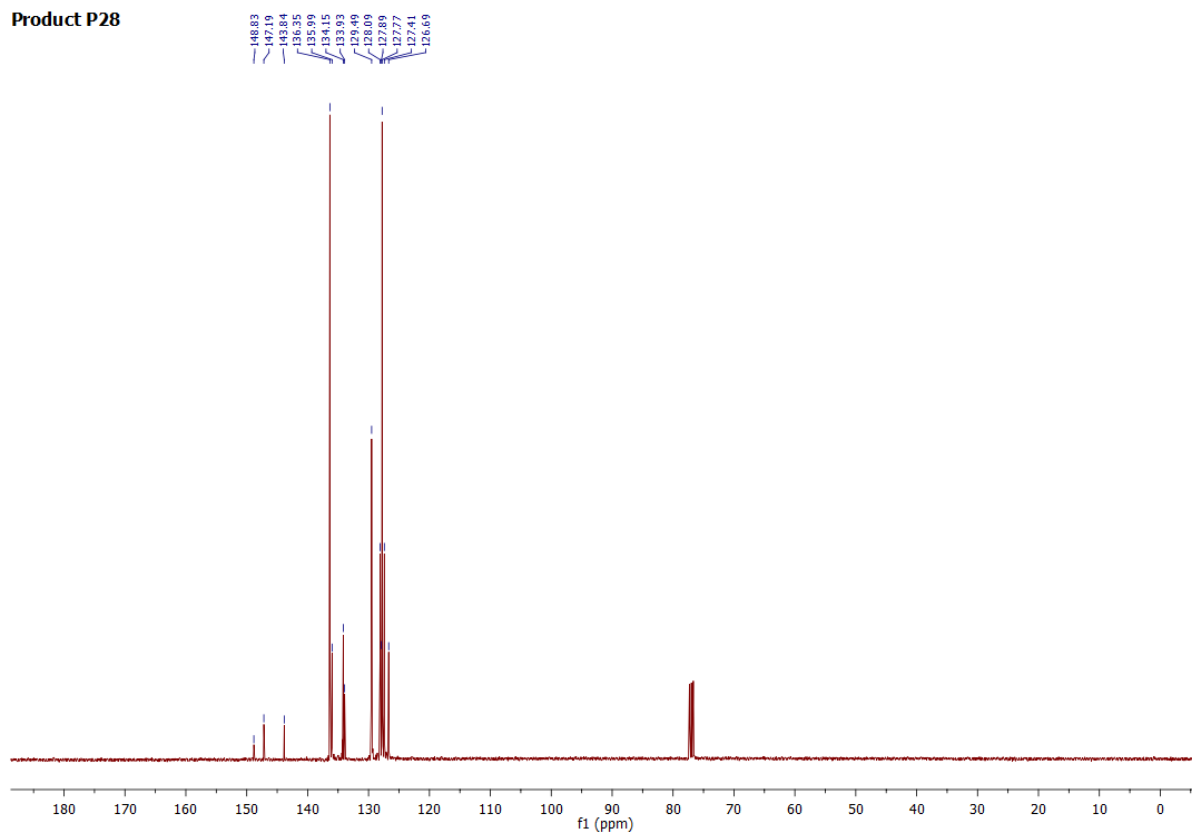

Figure S57. <sup>13</sup>C NMR (101 MHz, CDCl<sub>3</sub>) of product **P28**

**Product P29**

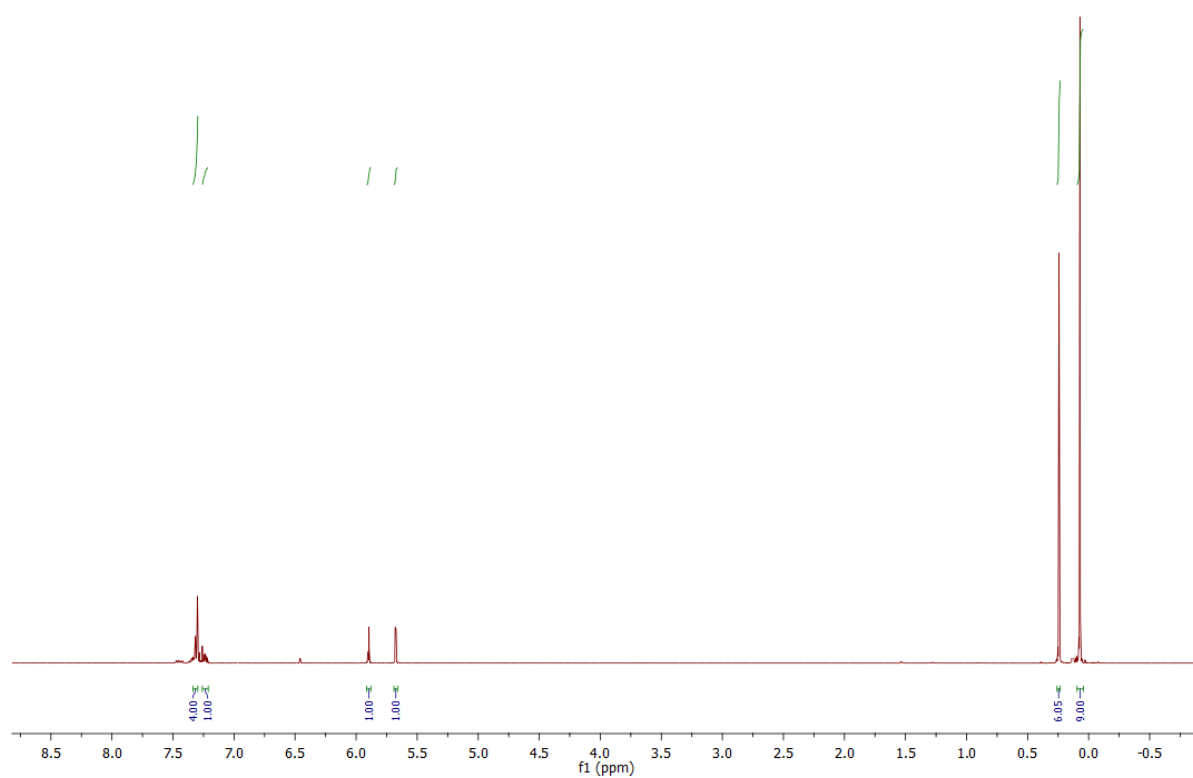

Figure S58. <sup>1</sup>H NMR (400 MHz, CDCl<sub>3</sub>) of product **P29**

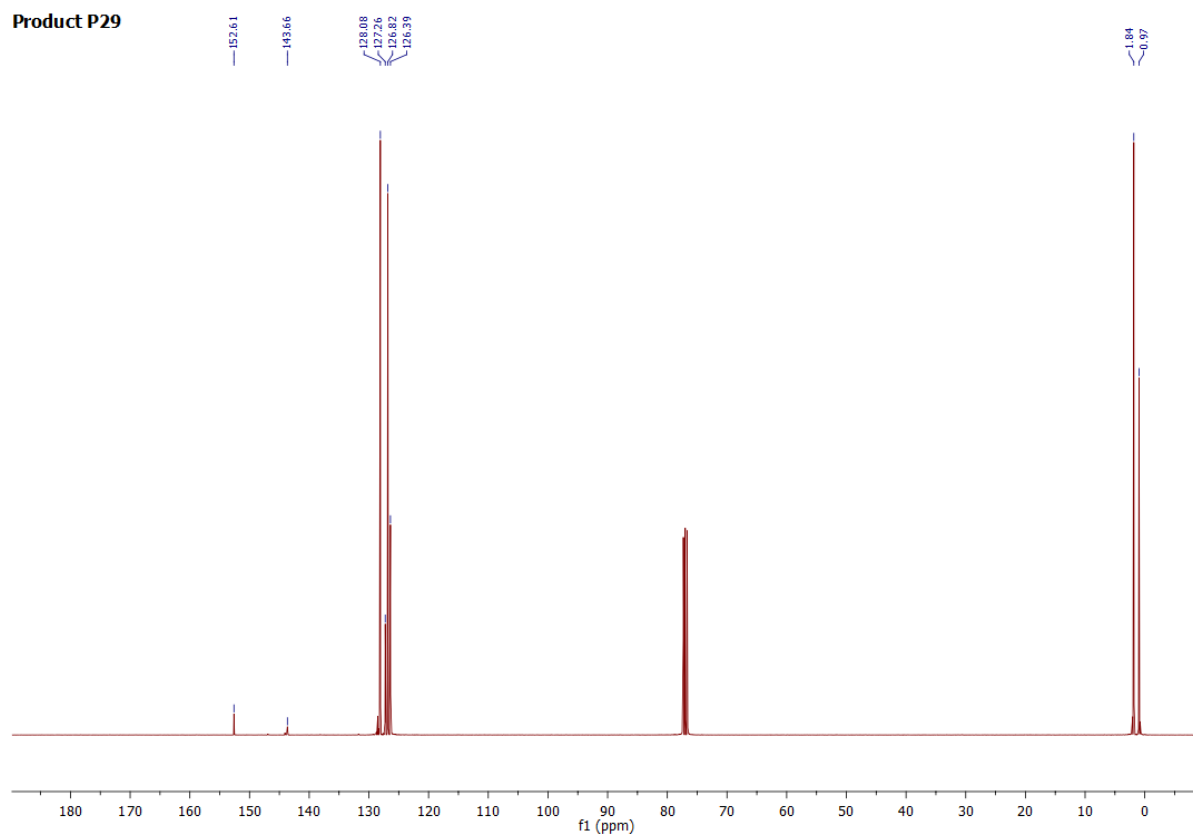

Figure S59. <sup>13</sup>C NMR (101 MHz, CDCl<sub>3</sub>) of product **P29**

Product P31

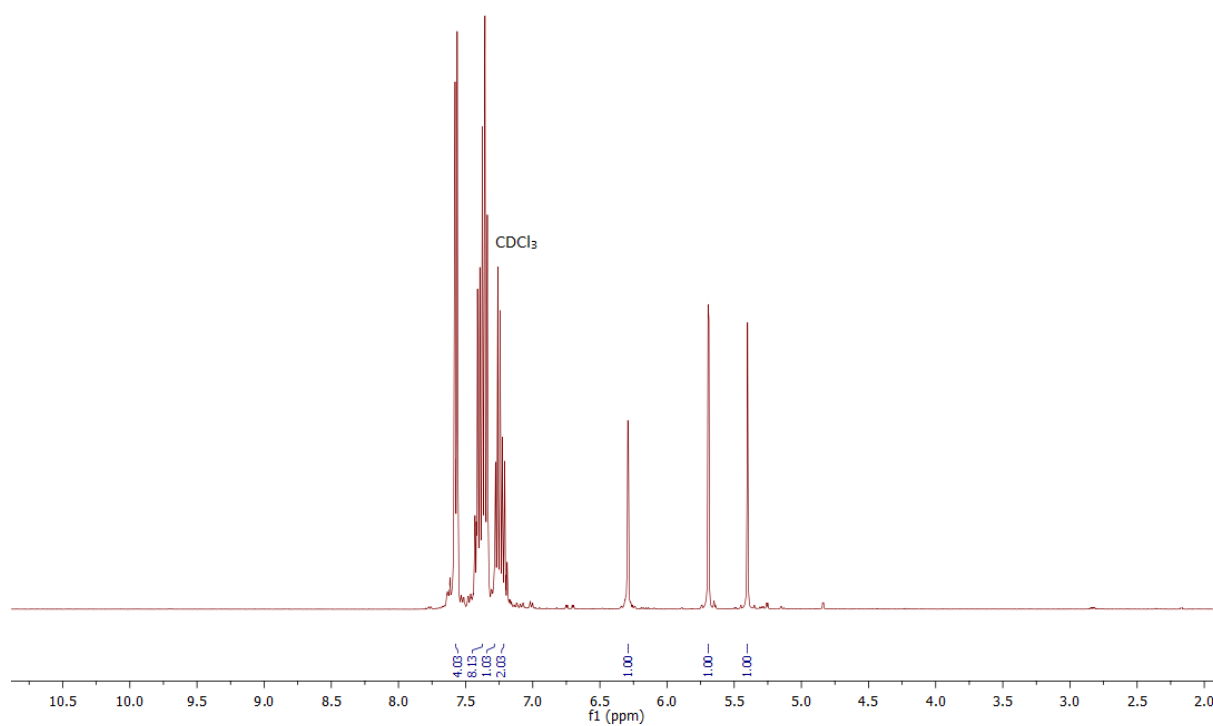

Figure S60. <sup>1</sup>H NMR (400 MHz, CDCl<sub>3</sub>) of product **P31**

Product P31

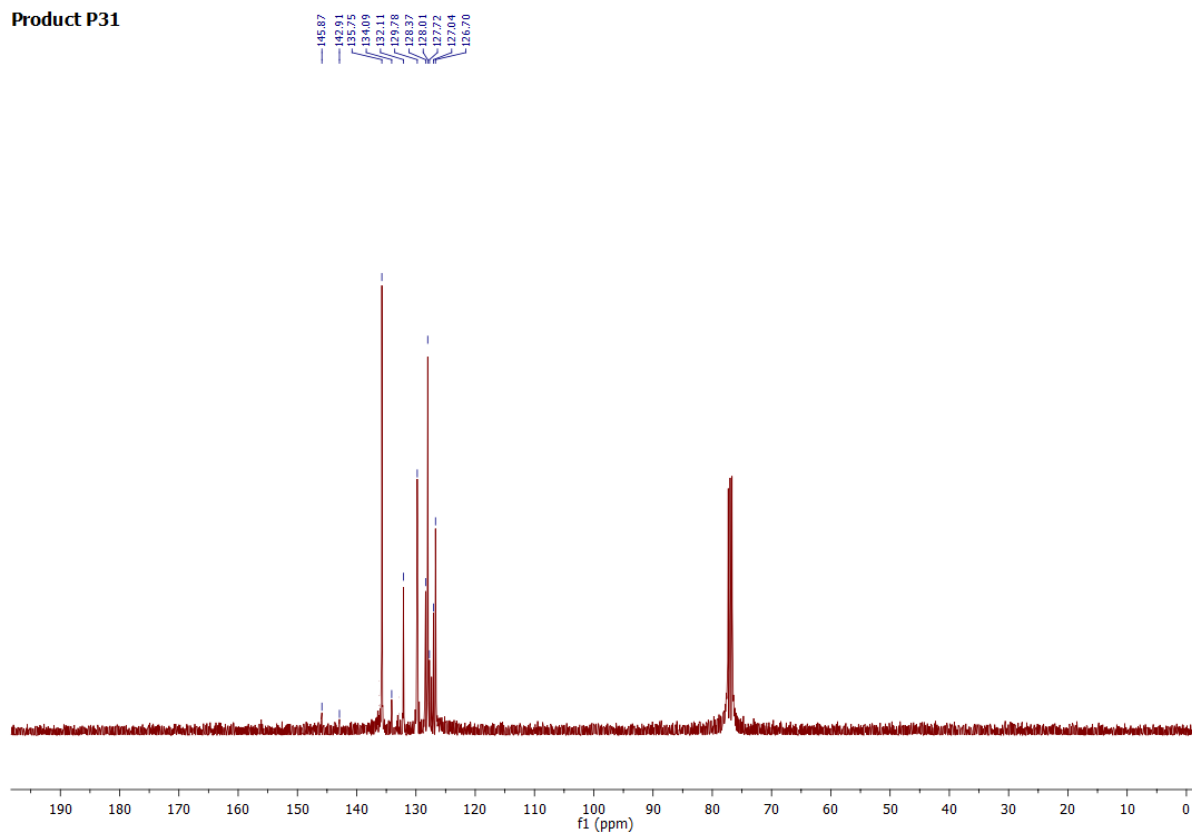

Figure S61. <sup>13</sup>C NMR (101 MHz, CDCl<sub>3</sub>) of product **P31**



**Product P32**

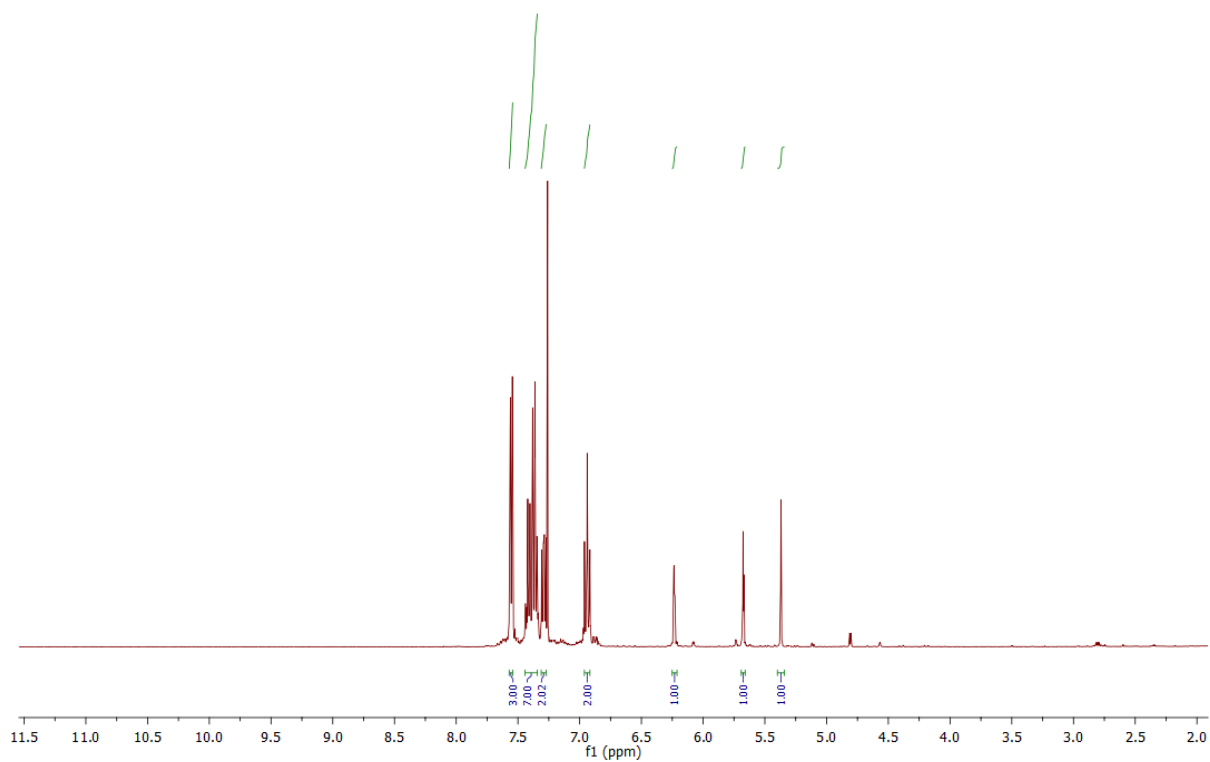

Figure S62.  $^1\text{H}$  NMR (400 MHz,  $\text{CDCl}_3$ ) of product **P32**

**Product P32**

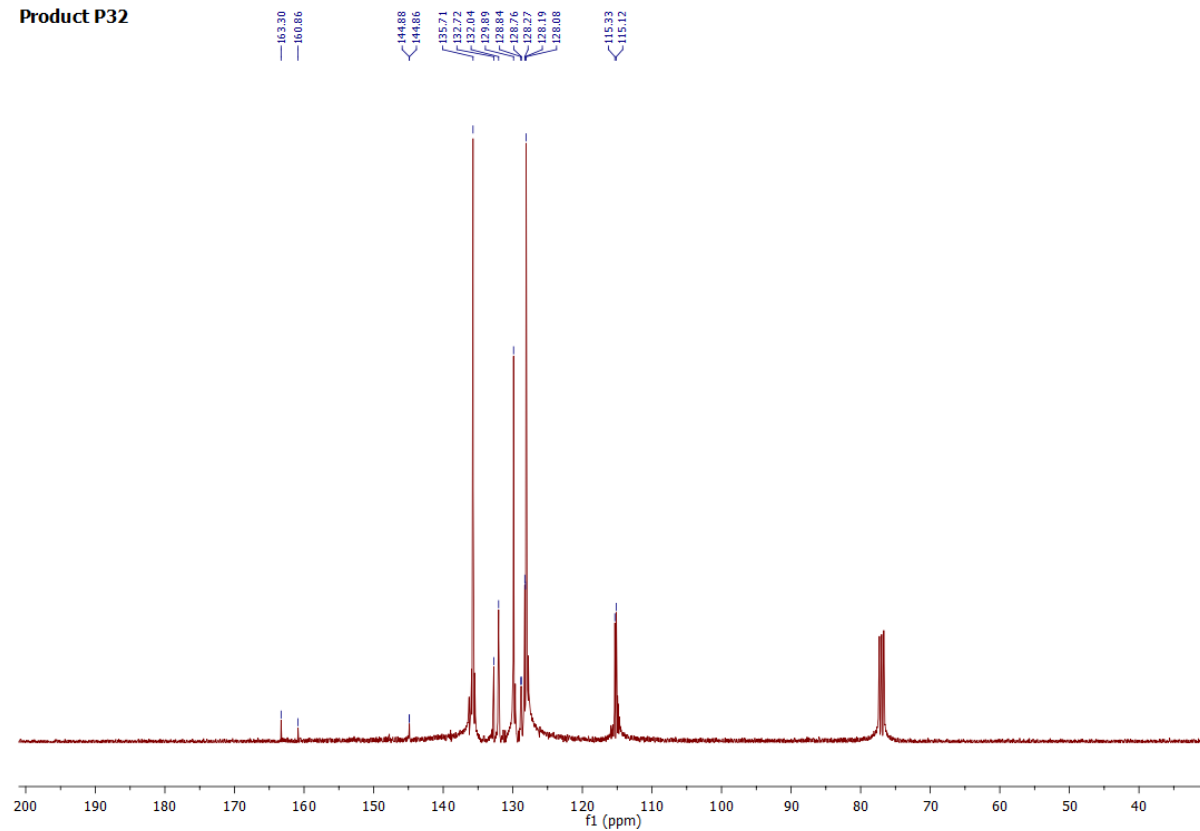

Figure S63.  $^{13}\text{C}$  NMR (101 MHz,  $\text{CDCl}_3$ ) of product **P32**

Product P33

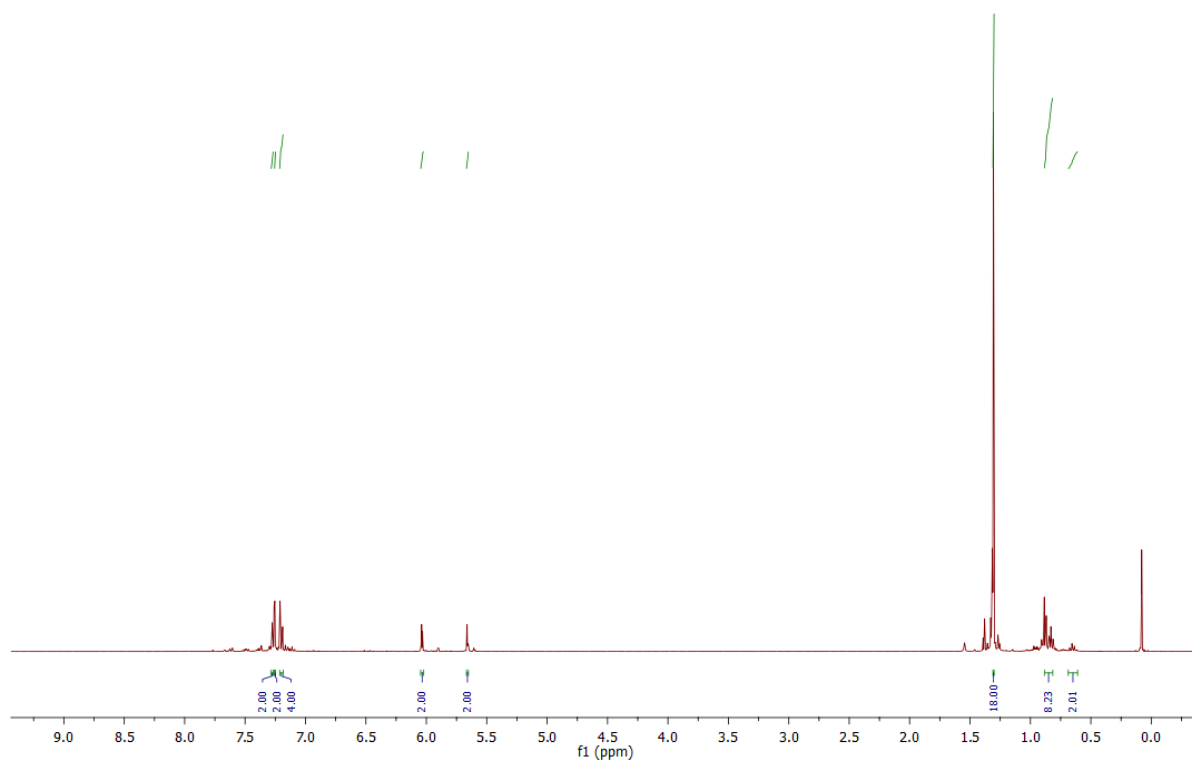

Figure S64.  $^1\text{H}$  NMR (400 MHz,  $\text{CDCl}_3$ ) of product **P33**

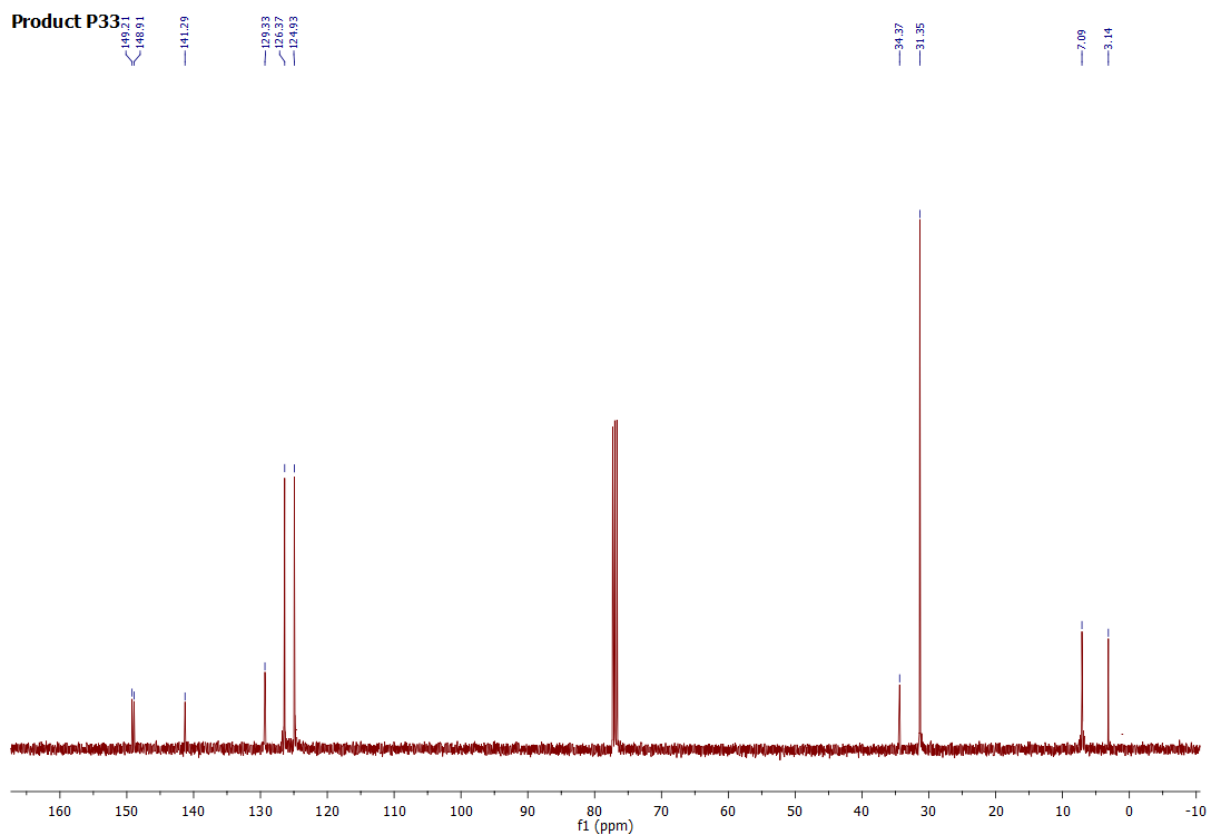

Figure S65.  $^{13}\text{C}$  NMR (101 MHz,  $\text{CDCl}_3$ ) of product **P33**

Product P34

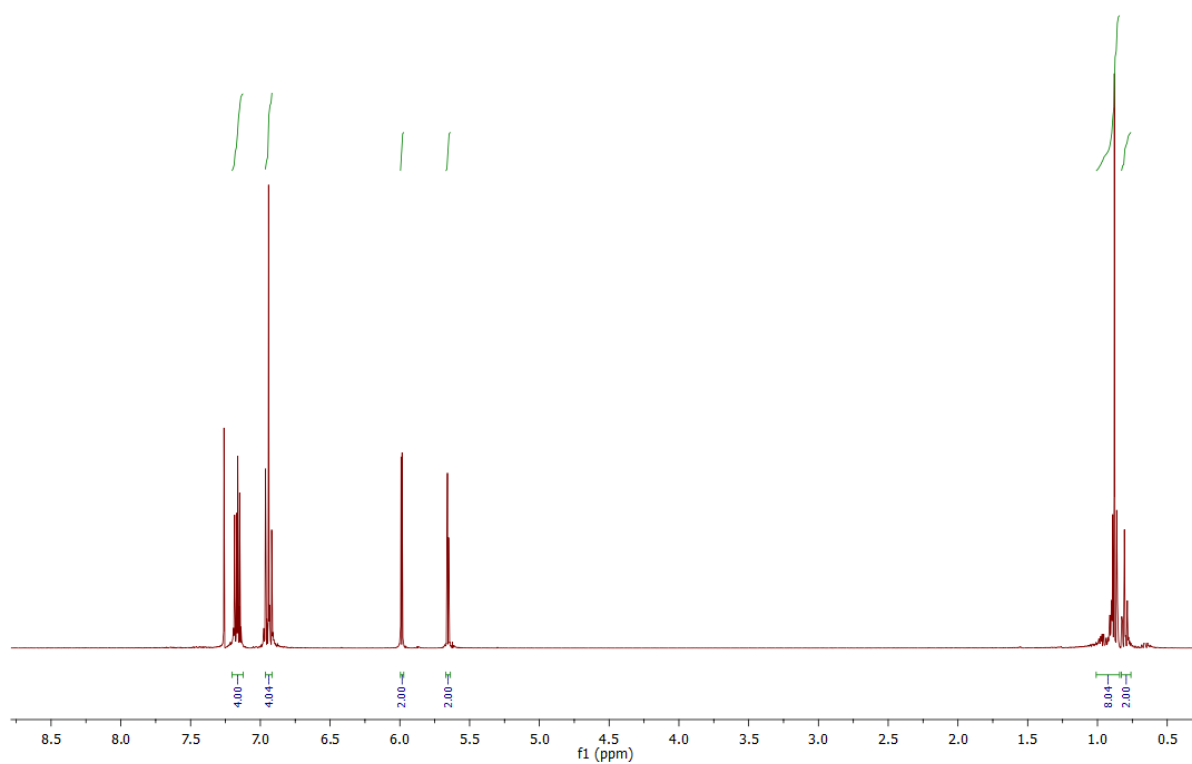

Figure S66. <sup>1</sup>H NMR (400 MHz, CDCl<sub>3</sub>) of product P34

Product P34

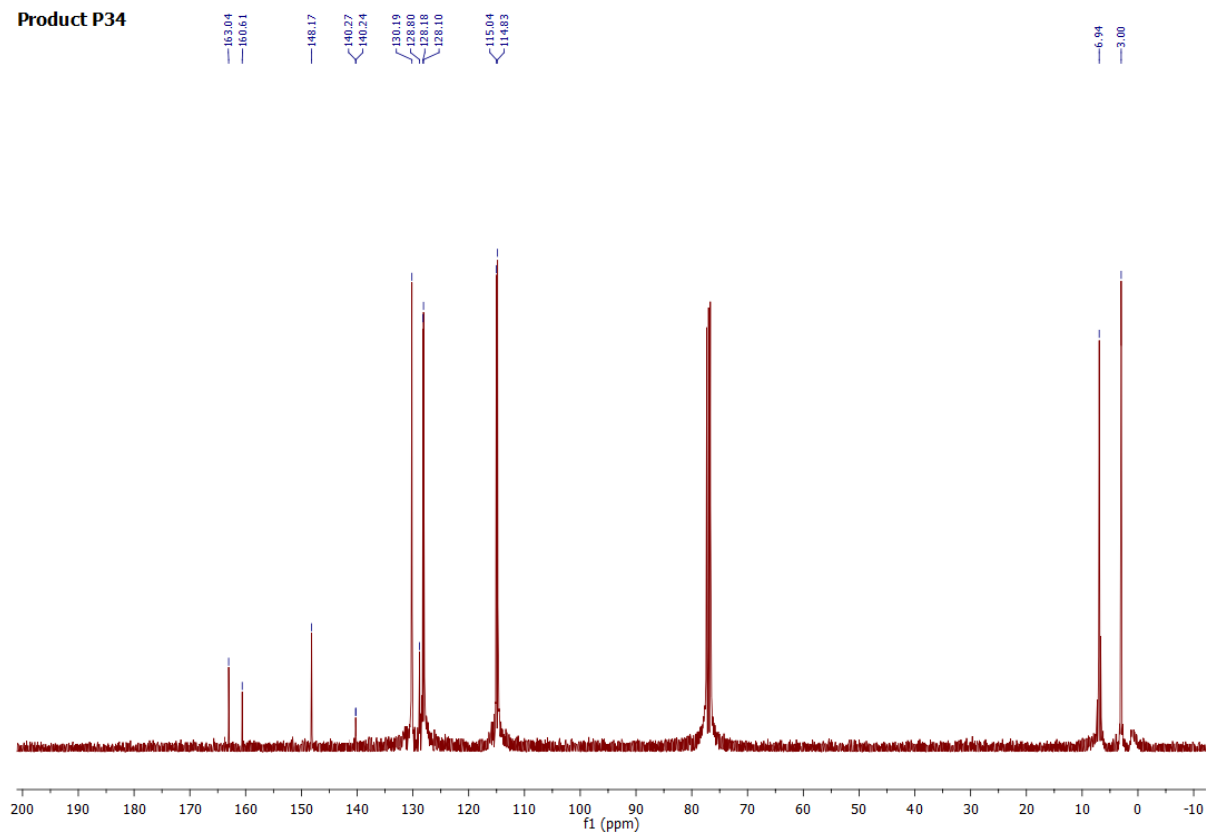

Figure S67. <sup>13</sup>C NMR (101 MHz, CDCl<sub>3</sub>) of product P34

## 5. References

- <sup>1</sup> Rivero-Crespo, M. A.; Leyva-Pérez, A.; Corma, A. A., *Chem. Eur. J.*, **2017**, *23*, 1702-1708.
- <sup>2</sup> Chauhan, B. P. S.; Sarka, A.; *Dalton Trans.*, **2017**, *46*, 8709-8715.
- <sup>3</sup> Gee, J. C.; Fuller, B. A.; Lockett, H.-M.; Sedghi, G.; Robertson, C. M.; Luzyanin, K. V., *Chem. Commun.*, **2018**, *54*, 9450—9453.
- <sup>4</sup> Wang, D; Lai, Y.; Wang, P.; Leng, X.; Xiao, J.; Deng, L., *J. Am. Chem. Soc.*, **2021**, *143*, 12847–12856.
- <sup>5</sup> Battace, A.; Zair, T.; Doucet, H.; Santelli, M.; *J. Organomet. Chem.*, **2005**, *690*, 3790-3802.
- <sup>6</sup> Zhang, X.; Ji, X.; Xie, X.; Ding, S., *Chem. Commun.*, **2018**, *54*, 12958—12961.
- <sup>7</sup> Bořt, M.; Žak, P.; Pietraszuk, C., *Dalton Trans.*, **2018**, *47*, 1903-1910.
- <sup>8</sup> Skrodzki, M.; Patroniak, V.; Pawluc, P., *Org. Lett.*, **2021**, *23*, 663-667.
- <sup>9</sup> Miura, H., Sasaki, S., Ogawa, R.; Shishido, T., *Eur. J. Org. Chem.*, **2018**, 1858-1862.
- <sup>10</sup> Zuo, Z.; Yang, J.; Huang, Z., *Angew. Chem. Int. Ed.* **2016**, *55*, 10839.
- <sup>11</sup> Kita, Y.; Tobisu, M.; Chatani, N., *Org. Lett.* **2010**, *12*, 1864–1867.
